# Supplementary material for: Performance and Value of IFN-Lambda3 and IFN-Lambda4 Genotyping in Patients with Chronic Hepatitis C (CHC) Genotype 2/3 in a Real World Setting
Source: PLoS One. 2015 Dec 23;10(12):e0145622. doi: 10.1371/journal.pone.0145622 (PMC4689517; doi:10.1371/journal.pone.0145622)
Supplement: S1 Data — (XLS) [file pone.0145622.s001.xls]

## Sheet: Blatt1
Pat_ID	Zentrum	Geb_Dat	Alter_alternativ	Sex	Groesse	Gewicht	HCV_Genotyp	Zirrhose_gesamt	HCV_BL_lokal	HCV_BL_E	HCV_BL_IU_angepasst	HCV_BL_log	HCV_RNA_BL_H_IUml	HCV_W4_lokal	HCV_W4_lokal_E	HCV_RNA_W4_H_IUml	HCV_W12_lokal	HCV_W12_lokal_E	HCV_W12_IUml_angepasst	HCV_W12_log	HCV_RNA_W12_H_IUml	HCV_Abfall_W12_log	HCV_End	HCV_EOT_lokal_IUml	HCV_EOT_response	HCV_FU24_lokal	HCV24E	HCV_Mess	MessTxt	HCV_Nachweisgrenze	ALT_Wert_original	ALT_E	ALT_Ul_angepasst	ALT_Ref	ALT_ULN	AST_W	AST_E	AST_Ul_angepasst	De_Ritis	GGT_Wert_original	GammaE	Gamma_Ul_angepasst	AP_Wert_original	AP_E	AP_Ul_angepasst	CHE_Wert_original	CHE_E	CHE_kUl_angepasst	Albumin_Wert_original
012a7y60p	35	12.08.1979	34.1361	1	170	85	3	0	3700	IU/ml	3700	3.5682	15										0					Amplicor		50 IU/ml	123	U/l	123	45	2.73333	67	U/l	67	0.544715	81	U/l	81	95	U/l	95				45.6
01wau52v2	11	07.09.1979	34.0667	0	162	50	3	0	9458	IU/ml	9458	3.9758	226000	28	IU/ml	29							1	0	1	neg	IU/ml	TaqMan		15 IU/ml	55	U/l	55	34	1.61765	72	U/l	72	1.30909	14	U/l	14	35	U/l	35
028FKUNVA	35	09.07.1985	28.2278	1	175	60	3	0	555000	IU/ml	555000	5.74429	29700	neg	IU/ml	0			0	0	0	5.74429	1	0	1	neg	IU/ml	Amplicor		50 IU/ml	128	U/l	128	45	2.84444	50	U/l	50	0.390625	22	U/l	22	63	U/l	63	8.075	KU/l	8.075	48
03f2xm2y6	25	01.01.1961	52.75	1	161	65.9	3	0	66559	IU/ml	66559	4.82321		neg.	IU/ml		< 12	IU/ml	12	1.07918		5.90239	1			0	IU/ml	Sonstiges	PCR	0	66	U/l	66	45	1.46667	25	U/l	25	0.378788	48	U/l	48
04srvvl5n	35	03.04.1964	49.4944	0	172	62	3	0	418000	IU/ml	418000	5.62118	1500	1500	IU/ml	62.6	neg.	IU/ml	0	0	0	5.62118	1	0	1	neg.	IU/ml	Amplicor		50 IU/ml	37	U/l	37	34	1.08824	27	U/l	27	0.72973	23	U/l	23	75	U/l	75				4.2
07nc2ukv7	25	02.06.1968	45.3306	1	195	75	3	0															0											45
0899XFYU4	16	06.06.1982	31.3194	1	176	76	3	0	3820000	IU/ml	3820000	6.58206	12000000			14			0	0	0	6.58206									163.8	U/l	163.8	45	3.64	82.2	U/l	82.2	0.501832	61.3	U/l	61.3	41	U/l	41
08e54y3st	22	19.02.1984	29.6167	0	178	86	3	0	4230000	IU/ml	4230000	6.62634		neg.	IU/ml		neg.	IU/ml	0	0		6.62634	1	0	1	neg.	IU/ml	TaqMan		0,01 KiU/ml	210	U/l	210	34	6.17647	105	U/l	105	0.5	41	U/l	41	55	U/l	55	5.7	KU/l	5.7	55.3
09plw6m0j	7	26.01.1959	54.6806	1	176	63.5	3	0	3720000	IU/ml	3720000	6.57054	792000	323	IU/ml	427	0	IU/ml	0	0	0	6.57054	1	0	1	0	IU/ml	TaqMan		<25	58	U/l	58	45	1.28889				0	32	U/l	32	88	U/l	88	7.233	KU/l	7.233	4.17
09sv8kcxg	22	15.09.1984	29.0444	1	183	77	3	0	1570000	IU/ml	1570000	6.1959		neg.	IU/ml		neg.	IU/ml	0	0		6.1959	1	0	1	neg.	IU/ml	TaqMan		0,01 KiU/ml	370	U/l	370	45	8.22222	125	U/l	125	0.337838	30	U/l	30	102	U/l	102	8.1	KU/l	8.1	60.6
0a701k13l	4	27.01.1986	27.6778	0	164	76.4	3	0	1030000	IU/ml	1030000	6.01284	508000	neg.	IU/ml		neg.	IU/ml	0	0	0	6.01284	1	0	1			TaqMan			8.43	µmol/ls	505.8	34	14.8765	3.76	µmol/ls	225.6	0.446026	0.77	µmol/ls	46.2	1.58	µmol/ls	94.8	169	µmol/ls	10.14	37
0a9lh97j5	7	21.01.1966	47.6944	0	166	56	3	1	16400	IU/ml	16400	4.21484	81600	0	IU/ml	14	0	IU/ml	0	0	0	4.21484	1	0	1	0	IU/ml	TaqMan		<25	35	U/l	35	34	1.02941				0	136	U/l	136	119	U/l	119	2.399	KU/l	2.399
0aex301ms	21	19.10.1955	57.95	1	190	94	3	0	682520	IU/ml	682520	5.83412		< 12	IU/ml	14	< 12	IU/ml	12	1.07918		6.9133	1	< 12	1	<12	IU/ml	Abbott Real Time PCR	Realtime Abbott	12 IU/ml	106	U/l	106	45	2.35556	85	U/l	85	0.801887	79	U/l	79	72	U/l	72
0alkhdr72	17	21.06.1969	44.2778	1	188	90.5	3	0	832800	IU/ml	832800	5.92054		<12	IU/ml		0	IU/ml	0	0	0	5.92054	0					Abbott Real Time PCR	Abbott Real Time	<12 50 IU/ml	174	U/l	174	45	3.86667	95	U/l	95	0.545977	112	U/l	112	102	U/l	102				48.9
0dvxa2aa6	17	06.02.1981	32.6528	1	186	87	3	0	602000	IU/ml	602000	5.7796		neg.	IU/ml		neg	IU/ml	0	0	0	5.7796	1			<NWG	IU/ml	Abbott Real Time PCR	PCR (Abott Real Time)	<50	51	U/l	51	45	1.13333	35	U/l	35	0.686275	38	U/l	38	79	U/l	79	10.852	KU/l	10.852	50.2
0fsy7hjd2	13	19.12.1972	40.7833	0	170	61	3	0	1104000	IU/ml	1104000	6.04297		neg.	IU/ml		neg	IU/ml	0	0	0	6.04297	1	0	1	neg	IU/ml	TaqMan		15 UI/ml	63	U/l	63	34	1.85294	38	U/l	38	0.603175	53	U/l	53	75	U/l	75				43.9
0gcghfkqy	7	09.02.1978	35.6444	1	180	79	3	0	4920000	IU/ml	4920000	6.69197	870000	0	IU/ml	0	0	IU/ml	0	0	0	6.69197	1	0	1			TaqMan		<25	88	U/l	88	45	1.95556	63	U/l	63	0.715909	26	U/l	26	62	U/l	62	8.077	KU/l	8.077	4.11
0gwptjmst	7	14.08.1950	63.1306	1	174	58	2	0	4830000	IU/ml	4830000	6.68395	2710000	<25	IU/ml	0	0	IU/ml	0	0	0	6.68395	1	0	1	3770000	IU/ml	TaqMan		<25	55	U/l	55	45	1.22222	49	U/l	49	0.890909	30	U/l	30	55	U/l	55	6.007	KU/l	6.007	4.38
0hmkxdqmx	13	12.05.1970	43.3861	0	168	60	2	0	338000	IU/ml	338000	5.52892		neg.	IU/ml		neg	IU/ml	0	0	0	5.52892	1	0	1	neg	IU/ml	TaqMan		15 IU/ml	76	U/l	76	34	2.23529	44	U/l	44	0.578947	44	U/l	44	60	U/l	60				40.9
0jda1e6q3	16	16.06.1976	37.2917	1	189	105	3	0	1010000	IU/ml	1010000	6.00432		< 15	IU/ml	0															167.9	U/l	167.9	45	3.73111	162.8	U/l	162.8	0.969625	46.1	U/l	46.1	62	U/l	62	9.138	KU/l	9.138
0jr855r9k	7	21.11.1970	42.8611	0	174	74	3	0	6240000	IU/ml	6240000	6.79518	1170000	0	IU/ml	0	0	IU/ml	0	0	0	6.79518	1					TaqMan		<25	121	U/l	121	34	3.55882				0	122	U/l	122	54	U/l	54				4.74
0l1cnc8qy	1	12.08.1955	58.1361	1	180	74	3	1	1320000	IU/ml	1320000	6.12057		neg.	IU/ml								0					TaqMan		< 15 IE/ml	105	U/l	105	45	2.33333	80	U/l	80	0.761905	114	U/l	114	83	U/l	83	6.81	KU/l	6.81	36
0l3619fv2	16	16.04.1968	45.4583	1	185	90	2	0	190000	IU/ml	190000	5.27875	281000	< 15	IU/ml	0		IU/ml	0	0	0	5.27875	1	<15	1	<15	IU/ml	TaqMan		<15	281.9	U/l	281.9	45	6.26444	87.3	U/l	87.3	0.309684	55.3	U/l	55.3	64	U/l	64
0L4TJE5VT	7	24.10.1960	52.9361	0	168	80	3	0	5510000	IU/ml	5510000	6.74115	3100000	52.3	IU/ml	650	0	IU/ml	0	0	0	6.74115	1	0	1	0	IU/ml	TaqMan		<25	65	U/l	65	34	1.91176				0	54	U/l	54	87	U/l	87	7.331	KU/l	7.331
0ll0d4lvd	1	27.08.1972	41.0944	1		85	3	0	535000	IU/ml	535000	5.72835											0								46	U/l	46	45	1.02222	42	U/l	42	0.913043	43	U/l	43	63	U/l	63	10.27	KU/l	10.27	45
0me0yjdnq	2	09.12.1982	30.8111	1	175	75	3	0	104000	IU/ml	104000	5.01703		< 25	IU/ml		neg. < 25	IU/ml	0	0	0	5.01703	1					TaqMan		25 IU/ml quant. 10 IU/ml qual.	0.59	µkat/l	35.3929	45	0.786509	0.49	µkat/l	29.3941	0.830508	0.27	µkat/l	16.1968	2.47	µkat/l	148.17				45.4
0mgmngnua	1	04.02.1967	46.6583	1	183	80	3	0	5870000	IU/ml	5870000	6.76864		neg.	IU/ml		neg.	IU/ml	0	0		6.76864	1	35700	0			TaqMan		<15 IE/ml	114	U/l	114	45	2.53333	80	U/l	80	0.701754	49	U/l	49	88	U/l	88	9.71	KU/l	9.71	42
0n0u3e9lp	2	27.11.1967	45.8444	1	184	93	3	1	1460000	IU/ml	1460000	6.16435		< 25	IU/ml		neg.	IU/ml	0	0		6.16435	1	< 25	1	763486	IU/ml	TaqMan		10 IU/ml	1.34	µkat/l	80.3839	45	1.78631	2.06	µkat/l	123.575	1.53731	2.15	µkat/l	128.974	1.78	µkat/l	106.779	115	µkat/l	6.89862	36.6
0q08uks37	1	14.05.1964	49.3806	0	160	74	3	0	374000	IU/ml	374000	5.57287		neg.	IU/ml		neg.	IU/ml	0	0		5.57287	1	0	1	neg.	IU/ml	TaqMan		<15 IE/ml	71	U/l	71	34	2.08824	57	U/l	57	0.802817	22	U/l	22	56	U/l	56	9.09	KU/l	9.09	39
0q13jvkau	16	20.10.1967	45.9472	1	177	67.5		0	13000000	IU/ml	13000000	7.11394		< 15	IU/ml	14		IU/ml	0	0	0	7.11394	1	0	1	positiv	IU/ml	TaqMan		<15	310.2	U/l	310.2	45	6.89333	148.1	U/l	148.1	0.477434	123.9	U/l	123.9	74	U/l	74
0r7hpa8c7	2	25.05.1985	28.35	1	184	70	3	0	698000	IU/ml	698000	5.84386		< 25	IU/ml		neg.	IU/ml	0	0		5.84386	1	0	1			TaqMan		25 IU/ml quant., 10 IU/ml qual	0.57	µkat/l	34.1932	45	0.759848	0.32	µkat/l	19.1962	0.561404	0.26	µkat/l	15.5969	1.94	µkat/l	116.377				49.1
0rcg007vl	1	13.11.1978	34.8833	0	160	51	3	0	1810000	IU/ml	1810000	6.25768		neg.	IU/ml		neg.	IU/ml	0	0		6.25768	1	0	1	neg.	IU/ml	TaqMan		<15 IE/ml	128	U/l	128	34	3.76471	66	U/l	66	0.515625	31	U/l	31	49	U/l	49	7.67	KU/l	7.67	38
0rgwu9hud	16	24.11.1955	57.8528	0	167	95	3	1	617000	IU/ml	617000	5.79029	685000	neg.	IU/ml	0	nd		0	0	0	5.79029	1			< 15	IU/ml	TaqMan		< 15 IU/ml	20.2	U/l	20.2	34	0.594118	23.5	U/l	23.5	1.16337	45.7	U/l	45.7	123	U/l	123
0rme1rphm	25	25.09.1978	35.0167	1	178	74	2	0	6437	Kopien/ml	2475.77	3.39371		0	IU/ml		0	IU/ml	0	0		3.39371	1	0	1	0	IU/ml	Abbott Real Time PCR	Abbott Realtime PCR	0	61	U/l	61	45	1.35556	130	U/l	130	2.13115	55	U/l	55	76	U/l	76
0sat71ql3	36	14.04.1963	50.4639	1	185	97	2	0	n.d.	IU/ml	4330	3.63649	4330	95400	IU/ml	174000							0					TaqMan		< 0,02	80	U/l	80	45	1.77778	58	U/l	58	0.725	100	U/l	100	95	U/l	95
0SJ6JH203	47	20065	58.8167	0	165	72	3	0			12000	4.07918	12000						0	0	0	4.07918		0	1	0		TaqMan		20			49	34	1.44118			42	0.857143			21			71			6.8
0t94kr30j	16	24.09.1959	54.0194	0	176	63	3	0	155000	IU/ml	155000	5.19033	612000	< 15	IU/ml	0	< 15	IU/ml	0	0	0	5.19033	1	< 15	1	< 15	IU/ml	TaqMan		< 15 IU/ml	20.5	U/l	20.5	34	0.602941	30	U/l	30	1.46341	36.7	U/l	36.7	80	U/l	80	5.684	KU/l	5.684
0tg6vatkd	36	24.01.1957	56.6861	1	180	75	3	0						22.9	IU/ml		neg.	IU/ml	0	0	0										92	U/l	92	45	2.04444	109	U/l	109	1.18478	233	U/l	233
0xfykulxv	13	09.06.1964	49.3111	1	178	65	3	0	10100000	IU/ml	10100000	7.00432	873000	neg.	IU/ml	0	neg	IU/ml	0	0	0	7.00432	1	0	1	neg	IU/ml	TaqMan		15 IU/ml	67	U/l	67	45	1.48889	30	U/l	30	0.447761	24	U/l	24	65	U/l	65				44.7
0xy87xrjv	36	08.07.1959	54.2306	1			3	0	nd														0								92	U/l	92	45	2.04444	60	U/l	60	0.652174	51	U/l	51	62	U/l	62
0YHM596S9	38	29.04.1968	45.4222	1	182	148	2	0	34684966	IU/ml	34684966	7.54014	8600000	neg	IU/ml	14	neg	IU/ml	0	0	0	7.54014	1	0	1			Sonstiges	PCR	10,5 IU/ml	100	U/l	100	45	2.22222	62	U/l	62	0.62	68	U/l	68	68	U/l	68	10.29	KU/l	10.29	44.11
0ylefw5uc	13	04.11.1965	47.9083	1	180	90	3	0	4340	IU/ml	4340	3.63749		neg.	IU/ml	14	neg	IU/ml	0	0	0	3.63749	1	0	1	neg	IU/ml	TaqMan		15 IU/ml	23	U/l	23	45	0.511111	30	U/l	30	1.30435	28	U/l	28	83	U/l	83				45.1
0yv1fxme2	13	29.07.1970	43.1722	0	169	72	2	1	466000	IU/ml	466000	5.66839	466000	neg	IU/ml		neg	IU/ml	0	0	0	5.66839	1	0	1	neg	IU/ml	TaqMan		15 IU/ml	368	U/l	368	34	10.8235	442	U/l	442	1.20109	181	U/l	181	125	U/l	125				34.4
10amcf9j0	38	19.10.1979	33.95	1	173	72	3	0	1391591	IU/ml	1391591	6.14351	69000	120	IU/ml	32	neg.	IU/ml	0	0	0	6.14351	1	0	1	neg	IU/ml	Sonstiges	PCR	10,5 IU/ml	113	U/l	113	45	2.51111	59	U/l	59	0.522124	75	U/l	75	65	U/l	65
10k4nmt9u	25	18.06.1983	30.2861	1	175	70	3	0	1184315	IU/ml	1184315	6.07347		0	IU/ml		0	IU/ml	0	0		6.07347	1	0	1	33937	IU/ml	Abbott Real Time PCR	Abbott Realtime	0	173	U/l	173	45	3.84444	87	U/l	87	0.50289	35	U/l	35	110	U/l	110				60.9
10TXAVCUD	13	01.01.1987	26.75	0	167	96	3	0			290000	5.4624	290000			14			0	0	0	5.4624											74	34	2.17647			40	0.540541			62			56
12jj9gj11	36	13.04.1981	32.4667	0	171	59	3	0	147000	IU/ml	147000	5.16732	19000										0					TaqMan		< 0,02	50	U/l	50	34	1.47059	39	U/l	39	0.78	103	U/l	103	104	U/l	104
14951mtel	25	31.08.1965	48.0861	1	183	74	3	0	8251886	IU/ml	8251886	6.91655		5340	IU/ml		0	IU/ml	0	0		6.91655	1	0	1			Abbott Real Time PCR	Abbott Realtime PCR	0	60	U/l	60	45	1.33333	42	U/l	42	0.7	58	U/l	58	75	U/l	75
15rj6a2qk	36	10.09.1962	51.0583	1	189	74	3	0	299000	IU/ml	299000	5.47567	559000	20	IU/ml	14	neg.	IU/ml	0	0	0	5.47567	1					TaqMan		0,02 KIU/ml	79	U/l	79	45	1.75556	68	U/l	68	0.860759	89	U/l	89	49	U/l	49
15y54n06u	47	08.06.1950	63.3139	1	187	94	3	0	2930000	IU/ml	2930000	6.46687		<25	IU/ml	864999	<20	IU/ml	0	0	0	6.46687	1	< 20	1	< 20	IU/ml	TaqMan		20 IE/ml	93	U/l	93	45	2.06667	52	U/l	52	0.55914
16tpke0qq	16	23.10.1982	30.9389	0	155	48	3	0	137000	IU/ml	137000	5.13672	34300	neg.	IU/ml	0	<15	IU/ml	15	1.17609		6.31281	1	<15	1	<15	IU/ml	TaqMan		< 15	24	U/l	24	34	0.705882	26.9	U/l	26.9	1.12083	12.2	U/l	12.2	42	U/l	42
16v1ep2rv	25	29.04.1970	43.4222	0	171	63	3	0	183771	IU/ml	183771	5.26428		35	IU/ml		0	IU/ml	0	0		5.26428	1	0	1	0	IU/ml	Abbott Real Time PCR	Abbott Realtime	0	42	U/l	42	34	1.23529	33	U/l	33	0.785714	16	U/l	16	74	U/l	74	7.1	KU/l	7.1	57.3
17qmp9j70	36	25.01.1964	49.6833	0	170	63	3	0	478000	IU/ml	478000	5.67943		70	IU/ml		neg.	IU/ml	0	0	0	5.67943	1	0.03	0	pos.	IU/ml	TaqMan		0.02	55	U/l	55	34	1.61765	60	U/l	60	1.09091	53	U/l	53	36	U/l	36
187nw10td	13	16.02.1974	39.625	1	178	105	3	0	35300	IU/ml	35300	4.54777	0	neg.	IU/ml	0	neg	IU/ml	0	0	0	4.54777	1	0	1	neg	IU/ml	TaqMan		15 IU/ml	28	U/l	28	45	0.622222	28	U/l	28	1	24	U/l	24	63	U/l	63
18C7SME16	11	10.09.1976	37.0583		178	80	3	0	3445000	IU/ml	3445000	6.53719	600000	neg	IU/ml	0															292	U/l	292			148	U/l	148	0.506849	111	U/l	111	52	U/l	52
1AF651GX0	44	08.12.1960	52.8139	1	172	78	2	0	161194	KIU/ml	161194000	8.20735	250000	neg	IU/ml	14	neg	IU/ml	0	0	0	8.20735	1	0	1	0	IU/ml	TaqMan		<25 kIU/l	138	U/l	138	45	3.06667	60.5	U/l	60.5	0.438406	52.5	U/l	52.5	55	U/l	55				42.4
1AP7A4L4F	47	29.06.1964	49.2556	1	187	150	3	0	1370000	IU/ml	1370000	6.13672		<20	IU/ml	0							0								54	U/l	54	45	1.2	48	U/l	48	0.888889	23	U/l	23	82	U/l	82	8.2	KU/l	8.2	49.3
1c13qxjt1	42	02.09.1978	35.0806	1	193	85	2	0	54000	IU/ml	54000	4.73239	1880										0								80	U/l	80	45	1.77778	44	U/l	44	0.55	24	U/l	24	60	U/l	60	8.286	KU/l	8.286	7
1dfc42ygq	47	21.07.1961	52.1944	0	170	65	3	0	2963000	IU/ml	2963000	6.47173	34900	<25	IU/ml	0	<20	IU/ml	0	0	0	6.47173	1	<20	1	< 20	IU/ml	TaqMan		20 IE/ml	69	U/l	69	34	2.02941	67	U/l	67	0.971014	66	U/l	66	48	U/l	48	7.258	KU/l	7.258	60.3
1dnq18ty9	42	13.04.1970	43.4667	0	167	76.4	3	0	660000	IU/ml	660000	5.81954		neg.	IU/ml		nd		0	0	0	5.81954	1	0	1	neg	IU/ml	TaqMan		<25	63	U/l	63	34	1.85294	104	U/l	104	1.65079	21	U/l	21	123	U/l	123	5.713	KU/l	5.713	3.9
1F9DK87TQ	13	29.08.1984	29.0889	1	184	82	3	0	4690000	IU/ml	4690000	6.67117	277000	neg	IU/ml	0	neg	IU/ml	0	0		6.67117	1	0	1	neg	IU/ml	TaqMan		15 IU/ml	390	U/l	390	45	8.66667	190	U/l	190	0.487179	71	U/l	71	83	U/l	83
1g19vxssl	16	06.12.1967	45.8194	1	180	70		0	2130000	IU/ml	2130000	6.32838	201000	< 15	IU/ml		nd	IU/ml	0	0	0	6.32838	1	<15	1	<15	IU/ml	TaqMan		< 15	363.8	U/l	363.8	45	8.08444	133.4	U/l	133.4	0.366685	136.8	U/l	136.8	56	U/l	56
1G1TRENEN	47	26899	40.1056	0	179	55	3	0			104000	5.01703	104000				neg		0	0		5.01703		0	1	0		TaqMan		20			45	34	1.32353			32	0.711111			16			41
1GG4MQ2EY	47	26601	40.9222	1	190	100	3	0			690000	5.83885	690000	<25	IU/ml				20	1.30103		7.13988				n.d.		TaqMan		20			101	45	2.24444			59	0.584158			71			91
1gnnauc69	17	29.08.1974	39.0889	0	162	75	3	0	472800	IU/ml	472800	5.67468	233999										0					Sonstiges	PCR	<12 - 50 IU/ml	28	U/l	28	34	0.823529	23	U/l	23	0.821429	78	U/l	78	59	U/l	59	10.846	KU/l	10.846	7.6
1GYV1W7YD	21	06.11.1979	33.9028	0	170	65	3	0	1534535	IU/ml	1534535	6.18598	6400000	neg	IU/ml	0	12	IU/ml	12	1.07918	0	7.26516	1	<12	1	<12	IU/ml	Abbott Real Time PCR	real Time Abbott	<12 IU/ml	62	U/l	62	34	1.82353	38	U/l	38	0.612903	22	U/l	22	60	U/l	60
1H62JERNE	11	12.03.1964	49.5528	1	181	86	3	1	2714000	IU/ml	2714000	6.43361		neg	IU/ml		neg	IU/ml	0	0	0	6.43361									148	U/l	148	45	3.28889	160	U/l	160	1.08108	333	U/l	333	107	U/l	107				34.1
1k33ekpfp	10	26.09.1968	45.0139	0	163	74	3	0	10000	IU/ml	10000	4		nicht reaktiv	IU/ml	14	neg.	IU/ml	0	0	0	4	1	0	1	neg.	IU/ml	TaqMan		15 IU/ml	117	U/l	117	34	3.44118	106	U/l	106	0.905983	101	U/l	101	118	U/l	118	5.6	KU/l	5.6	45
1k9x3dw7n	45	11.05.1971	42.3889	0	163	55	3	0	4350000	IU/ml	4350000	6.63849	23000	< 43	IU/ml		neg.	IU/ml	0	0	0	6.63849	1	0	1	neg.	IU/ml	Sonstiges	PCR	43 IE/ml bis 69 Mio. IE/ml				34
1llausxfp	10	15.11.1976	36.8778	0	155	49	2	0	3000	IU/ml	3000	3.47712		nicht reaktiv	IU/ml	0	neg.	IU/ml	0	0	0	3.47712	1	0	1	neg.	IU/ml	TaqMan		15 IU/ml	15	U/l	15	34	0.441176	25	U/l	25	1.66667	7	U/l	7	58	U/l	58				45
1mjpcexta	6	18.05.1966	47.3694	1	178	74	3	0	247000	IU/ml	247000	5.3927		80	IU/ml	25.4	0	IU/ml	0	0	0	5.3927	1	0	1	neg.	IU/ml	TaqMan		0	214	U/l	214	45	4.75556	114	U/l	114	0.53271	44	U/l	44	70	U/l	70	7	KU/l	7	35.4
1nr3st92g	10	03.06.1977	36.3278	1	191	104	3	0			337	2.52763	337	neg.	IU/ml	0	nd	IU/ml					1	0	1			TaqMan		< 15 IU/ml	37	U/l	37	45	0.822222	30	U/l	30	0.810811	45	U/l	45	64	U/l	64	11.66	KU/l	11.66	49
1nw4f0udv	25	03.02.1959	54.6611	1	178	75	3	0	1246380	IU/ml	1246380	6.09565		5083	IU/ml		942551	IU/ml	942551	5.9743		12.07									329	U/l	329	45	7.31111	262	U/l	262	0.796353	75	U/l	75	76	U/l	76	7.1	KU/l	7.1	54.2
1NWWSQ6F0	13	19.03.1960	53.5333	0		54	3	0	842000	IU/ml	842000	5.92531		4070	IU/ml	1370			0	0	0	5.92531									138	U/l	138	34	4.05882	98	U/l	98	0.710145	274	U/l	274	95	U/l	95				43
1nxhlefa7	6	16.04.1958	55.4583	0	170	61.4	3	0	704000	IU/ml	704000	5.84757		<15	IU/ml	14	neg.	IU/ml	0	0	0	5.84757	1	0	1	0	IU/ml	Sonstiges	Ampli Prep / TaqMan		170	U/l	170	34	5	119	U/l	119	0.7	225	U/l	225	59	U/l	59	8.626	KU/l	8.626	36.5
1s6f1pg97	10	22.06.1959	54.275	0	163	72	2	0	90000	IU/ml	90000	4.95424	1470000	neg.	IU/ml		neg.	IU/ml	0	0	0	4.95424	1	0	1	neg.	IU/ml	TaqMan		40 IU/ml	39	U/l	39	34	1.14706	38	U/l	38	0.974359	58	U/l	58
1s9v991g8	6	01.04.1955	58.5	0	158	85	2	0	3940000	IU/ml	3940000	6.5955	3870000	neg.	IU/ml	0	neg.	IU/ml	0	0	0	6.5955	1	0	1	neg.	IU/ml	TaqMan		0	130	U/l	130	34	3.82353	71	U/l	71	0.546154	45	U/l	45	106	U/l	106	10.509	KU/l	10.509	39.7
1u3rj82q6	10	05.08.1959	54.1556	0	170	66.7	3	0	30000	IU/ml	30000	4.47712		neg.	IU/ml																82	U/l	82	34	2.41176	55	U/l	55	0.670732	44	U/l	44	61	U/l	61	9.27	KU/l	9.27	45
1vlqwsmxs	10	14.09.1953	60.0472	1	178	81	3	0	1000000	IU/ml	1000000	6		8000	IU/ml	4890	neg.	IU/ml	0	0		6		0	1			TaqMan		< 15 IU/ml	67	U/l	67	45	1.48889	40	U/l	40	0.597015				72	U/l	72				43
1VVMVYFQL	39							0			290000	5.4624	290000						0	0	0	5.4624
1xp58exep	10	31.05.1980	33.3361	1	174	68	3	0	4000000	IU/ml	4000000	6.60206		15	IU/ml																247	U/l	247	45	5.48889	126	U/l	126	0.510121	31	U/l	31	82	U/l	82	8.95	U/l	8.95	48
1xqt3vwff	25	10.04.1955	58.475	0	168	76	3	1	1300275	IU/ml	1300275	6.11404		84	IU/ml		nd						1	0	1	0	IU/ml	Abbott Real Time PCR	Abbott Realtime PCR	0	101	U/l	101	34	2.97059	117	U/l	117	1.15842	176	U/l	176	132	U/l	132
1YATJY786	35	02.05.1975	38.4139	1	180	86	3	0	53900	IU/ml	53900	4.73159	91000	neg	IU/ml	0			0	0	0	4.73159									65	U/l	65	45	1.44444	36	U/l	36	0.553846	37	U/l	37	89	U/l	89	8.8	KU/l	8.8	49
1YGPG1YUK	21	19.04.1981	32.45	0	166	52	3	0	60354	IU/ml	60354	4.78071		<12	IU/ml		<12	IU/ml	0	0	0	4.78071	1	<12	1			Abbott Real Time PCR	RealTime Abbott	<12 IU	166	U/l	166	34	4.88235	95	U/l	95	0.572289	14	U/l	14	39	U/l	39	7.172	KU/l	7.172	5.4
1yqtwfr2e	10	22.12.1961	51.775	1	175	72	3	0	300000	IU/ml	300000	5.47712		neg.	IU/ml	14	nd	IU/ml	0	0	0	5.47712	1	0	1	neg.	IU/ml	TaqMan		15 U/ml	59	U/l	59	45	1.31111	58	U/l	58	0.983051	37	U/l	37	74	U/l	74	9.58	KU/l	9.58	46
1yrrcvsrv	25	21.08.1975	38.1111	1	178	84	3	0	212032	IU/ml	212032	5.3264		0	IU/ml		0	IU/ml	0	0		5.3264	1	0	1	0	IU/ml	Sonstiges	PCR	0 IU/ml	120	U/l	120	45	2.66667	68	U/l	68	0.566667	52	U/l	52	120	U/l	120
21EXXPNKR	16	17.06.1966	47.2889	1	186	80	3	0	5920000	IU/ml	5920000	6.77232	31500000			40															80.3	U/l	80.3	45	1.78444	53.7	U/l	53.7	0.668742	32.3	U/l	32.3	61	U/l	61
21JSHHTGK	21	05.03.1970	43.5722	0	170	73.9	3	0	1268207	IU/ml	1268207	6.10319	280000	48	IU/ml	130	neg	IU/ml	0	0	0	6.10319	1	<12	1	<12	IU/ml	Abbott Real Time PCR	Abbott Real Time	<12 IU	56	U/l	56	34	1.64706	47	U/l	47	0.839286	71	U/l	71	75	U/l	75	9.877	KU/l	9.877	55.4
21mnu2a03	10	16.09.1960	53.0417	0	167	65	3	0	2000000	IU/ml	2000000	6.30103	1220000	< 15	IU/ml	0			0	0	0	6.30103									112	U/l	112	34	3.29412	69	U/l	69	0.616071	338	U/l	338	83	U/l	83	7.2	U/l	7.2	46
22A4RVD09	42	01.10.1962	51	1	186	76	3	0	2800000	IU/ml	2800000	6.44716	130000	63	IU/ml	2000	<25	IU/ml	0	0	0	6.44716		< 25	1	93000	IU/ml	TaqMan		25 IU/ml	67.2	U/l	67.2	45	1.49333	50.8	U/l	50.8	0.755952	218	U/l	218	101	U/l	101	6.385	KU/l	6.385	4.4
24fj9m046	10	09.01.1962	51.7278	1	178	100	2	0	nd	IU/ml	951000	5.97818	951000	neg.	IU/ml	0	neg.	IU/ml	0	0	0	5.97818	1	0	1	neg.	IU/ml	TaqMan		15 IU/ml	68	U/l	68	45	1.51111	48	U/l	48	0.705882	44	U/l	44	64	U/l	64	9.48	KU/l	9.48	44
24N2D7N9W	42	06.04.1983	30.4861	1	170	76	3	0	540000	IU/ml	540000	5.73239	540000			860000															137	U/l	137	45	3.04444	85	U/l	85	0.620438	30	U/l	30	80	U/l	80	7025	KU/l	7.025	4.6
24yl4th4u	10	16.07.1982	31.2083	1	180	75		0	300000	IU/ml	300000	5.47712		n.d.	IU/ml		15	IU/ml	15	1.17609	0	6.65321	1	0	1	neg.	IU/ml	TaqMan		< 15 IU/ml	61	U/l	61	45	1.35556	40	U/l	40	0.655738	81	U/l	81	82	U/l	82	7.72	U/l	7.72	43
2555tp4cg	6	24.12.1975	37.7694	0	176	65	3	0	5570	IU/ml	5570	3.74586		2462	IU/ml		0	IU/ml	0	0	0	3.74586	1	0	1	0	IU/ml	TaqMan		0	27.6	U/l	27.6	34	0.811765	34.2	U/l	34.2	1.23913	25.8	U/l	25.8	72	U/l	72	7.77	KU/l	7.77	52
26mk3mypc	7	26.08.1977	36.0972	0	161	69	3	0	119000	IU/ml	119000	5.07555	135000	0	IU/ml	0	0	IU/ml	0	0	0	5.07555	1	0	1	0	IU/ml	TaqMan		<25	92	U/l	92	34	2.70588				0	55	U/l	55	50	U/l	50	10.149	KU/l	10.149
27j8gk764	7	20.04.1965	48.4472	0	163	63	3	0	3740000	IU/ml	3740000	6.57287	635000	<25	IU/ml	14	0	IU/ml	0	0	0	6.57287	1	0	1	0	IU/ml	TaqMan		<25	68	U/l	68	34	2				0	102	U/l	102	92	U/l	92	8.6	KU/l	8.6
2av0e6qq3	7	20.01.1968	45.6972	1	187	109.5	3	0	519000	IU/ml	519000	5.71517	173000	756	IU/ml	1090	102	IU/ml	102	2.0086	28	7.72377	1	0	1	0	IU/ml	TaqMan		<25	71	U/l	71	45	1.57778				0	65	U/l	65	77	U/l	77	9.263	KU/l	9.263
2hhy7p0cr	85	02.12.1981	31.8306	0	181	80.9	3	0	1000	IU/ml	1000	3		<10	IU/ml	0	<10	IU/ml	0	0	0	3						TaqMan		10IU/ml	29	U/l	29	34	0.852941	25	U/l	25	0.862069	24	U/l	24	107	U/l	107				52.6
2K41RGEFL	35	06.01.1961	52.7361	0	160	75	3	1	1050000	IU/ml	1050000	6.02119	39300	100	IU/ml	125							1	1830000	0	473000	IU/ml	TaqMan		0.015 IU/ml	16	U/l	16	34	0.470588	39	U/l	39	2.4375	110	U/l	110	126	U/l	126				46.5
2LAQKTAH1	35	28.12.1969	43.7583	1	165	90	3	0	1460000	IU/ml	1460000	6.16435		neg.	IU/ml	0	neg	IU/ml	0	0	0	6.16435	1	0	1	neg	IU/ml	TaqMan		0,015 KIU/ml	176	U/l	176	45	3.91111	118	U/l	118	0.670455	120	U/l	120	86	U/l	86	7.3	KU/l	7.3	57.2
2N7Q9Y8AN	35	21.03.1972	41.5278	1	177	85	3	0	5520000	IU/ml	5520000	6.74194	354000	neg.	IU/ml	0	neg	IU/ml	0	0		6.74194	1	0	1	neg	IU/ml	Amplicor		50 KIU/ml	187	U/l	187	45	4.15556	92	U/l	92	0.491979	98	U/l	98	59	U/l	59	5	KU/l	5	4.83
2Q1XQH6NP	35	30.12.1957	55.7528	1	190	70	3	0	547000	IU/ml	547000	5.73799	130000										0					TaqMan		0,015 KIU/ml	50	U/l	50	45	1.11111	65	U/l	65	1.3	377	U/l	377	95	U/l	95	3.6	KU/l	3.6	45
2REM4J8T2	35	24.01.1979	34.6861	1	196	90	3	0	2230000	IU/ml	2230000	6.3483	99000	8800	IU/ml	7430	neg	IU/ml	0	0	0	6.3483	0					Amplicor		50 IU/ml	56	U/l	56	45	1.24444	34	U/l	34	0.607143	67	U/l	67	87	U/l	87	11957	KU/l	11.957	40
2rf0e8wj2	47	23.09.1984	29.0222	0	173	59	3	0	128000	IU/ml	128000	5.10721	4120				<20	IU/ml	0	0	0	5.10721	1	< 20	1			TaqMan		20 IU/ml	127	U/l	127	34	3.73529	70	U/l	70	0.551181	32	U/l	32	83	U/l	83	14.5	KU/l	14.5	53.9
2RL0ETELK	35	03.10.1964	48.9944	0	164	57	3	0	4290000	IU/ml	4290000	6.63246		neg	IU/ml	0	neg	IU/ml	0	0	0	6.63246	1	0	1	neg	IU/ml	Amplicor		50 IU/ml	155	U/l	155	34	4.55882	116	U/l	116	0.748387	28	U/l	28	56	U/l	56
2UFVNGGU2	13	30.12.1978	34.7528	1	180	94	3	0	182000	IU/ml	182000	5.26007	163000	neg	IU/ml	0	neg	IU/ml	0	0	0	5.26007	1	0	1	neg.	IU/ml	TaqMan		15 IU/ml	50	U/l	50	45	1.11111	32	U/l	32	0.64	67	U/l	67	57	U/l	57				49.3
2ux06caw6	47	04.10.1977	35.9917	0	161	50	3	0	85500	IU/ml	85500	4.93197	5170	<20	IU/ml		< 20	IU/ml	0	0	0	4.93197	1	< 20	1			TaqMan		20 IU/ml	24	U/l	24	34	0.705882	14	U/l	14	0.583333	18	U/l	18	46	U/l	46	9.1	KU/l	9.1	59.7
2VET3PUU1	13	19.11.1970	42.8667	1	196	136	3	0	436000	IU/ml	436000	5.63949	270000	neg	IU/ml	0	neg	IU/ml	0	0	0	5.63949	1	0	1	neg.	IU/ml	TaqMan		15IU/ml	120	U/l	120	45	2.66667	102	U/l	102	0.85	108	U/l	108	130	U/l	130
2x5l979g8	91	23.11.1962	50.8556	1	172	80	3	0	400000	IU/ml	400000	5.60206		< NWG	IU/ml	0	neg.	IU/ml	0	0	0	5.60206	1	0	1	neg.	IU/ml	TaqMan		< 12 IU/ml	1.79	µmol/sl	107.4	45	2.38667	0.98	µmol/sl	58.8	0.547486	0.67	µmol/sl	40.2	1.66	µmol/sl	99.6	101	µmol/sl	6.06	47.58
30Q2CER2R	7	23.03.1953	60.5222	0	154	50	3	0	3140000	IU/ml	3140000	6.49693	7500000	0	IU/ml	7500000	0	IU/ml	0	0	0	6.49693	1	0	1	neg	IU/ml	TaqMan		<25 IU/ml	81	U/l	81	34	2.38235				0	32	U/l	32	139	U/l	139	7.483	KU/l	7.483
30vllfkfe	91	25.03.1974	39.5167	1	175	80	3	0	2300000	IU/ml	2300000	6.36173	1730	neg.	IU/ml	0	neg.	IU/ml	0	0	0	6.36173	1	0	1	neg.	IU/ml	TaqMan		12 IU/ml	8.24	µmol/sl	494.4	45	10.9867	3.77	µmol/sl	226.2	0.457524	2.04	µmol/sl	122.4	1.4	µmol/sl	84	131	µmol/sl	7.86	51.15
3223RXC9A	13	15.01.1960	53.7111	1	174	64	3	0	440000	IU/ml	440000	5.64345		<15	IU/ml																70	U/l	70	45	1.55556	60	U/l	60	0.857143	17	U/l	17	48	U/l	48	8.17	KU/l	8.17	39
324ew0gkv	142	16.03.1987	26.5417	1	176	69	3	0	38500	Kopien/ml	14807.7	4.17049	104956	< 12	IU/ml	14	<12	IU/ml	0	0	0	4.17049	1	<12	1	<12	IU/ml	Abbott Real Time PCR	Abbott	<12	144	U/l	144	45	3.2	76	U/l	76	0.527778	33	U/l	33	98	U/l	98
32wwlragu	91	15.08.1978	35.1278	1	172	80	3	0	1440000	IU/ml	1440000	6.15836	1970000	neg.	IU/ml		neg.	IU/ml	0	0	0	6.15836	1	0	1	neg.	IU/ml	TaqMan		0,025 KIU/ml	2.16	µmol/sl	129.6	45	2.88	0.85	µmol/sl	51	0.393519	0.7	µmol/sl	42	1.05	µmol/sl	63	117	µmol/sl	7.02	50.69
33a074csh	44	18.08.1964	49.1194	1	187	94	3	0	275963	IU/ml	275963	5.44085	176000	neg.	IU/ml	0	neg.	IU/ml	0	0	0	5.44085	1	0	1			TaqMan		25 IU/ml	294	U/l	294	45	6.53333	179	U/l	179	0.608844	64.8	U/l	64.8	80.7	U/l	80.7				38.4
35h5dy5m1	142	01.05.1958	55.4167	0	172	64	3	0	43803	IU/ml	43803	4.6415	49100	< 12	IU/ml	0	< 12	IU/ml	0	0	0	4.6415	1	< 12	1	< 12	IU/ml	Abbott Real Time PCR	Abbott Real Time PCR	< 12 IU/ml	76	U/l	76	34	2.23529	78	U/l	78	1.02632	235	U/l	235	80	U/l	80				62.8
35m38ur62	91	22.11.1979	33.8583	1	186	78	2	0	145000	IU/ml	145000	5.16137		neg.	IU/ml	0	neg.	IU/ml	0	0	0	5.16137	1	0	1	neg.	IU/ml	TaqMan		12 IU/ml	1.06	µmol/sl	63.6	45	1.41333	0.59	µmol/sl	35.4	0.556604	0.8	µmol/sl	48	1.53	µmol/sl	91.8				49.9
35uge2dwf	120	08.07.1979	34.2306	0	161	50	3	0	100000	IU/ml	100000	5	158000	<12	IU/ml		neg	IU/ml	0	0		5	1	0	1	neg	IU/ml	Abbott Real Time PCR	abbott real time	12 IU/ml	0.62	µkat/l	37.1926	34	1.0939	0.47	µkat/l	28.1944	0.758065	0.17	µkat/l	10.198	0.65	µkat/l	38.9922				58.6
36VTWT328	11	15.03.1993	20.5444	1	188	68	3	0	893397	IU/ml	893397	5.95104	190000	13892	IU/ml	13000															45	U/l	45	45	1	27	U/l	27	0.6	33	U/l	33	54	U/l	54
36WY5LG1G	47	09.07.1972	41.2278	1	176	65	3	1	1570000	IU/ml	1570000	6.1959		420	IU/ml	690	<20	IU/ml	20	1.30103		7.49693	1	<20	1			TaqMan		<20	189	U/l	189	45	4.2	180	U/l	180	0.952381	248	U/l	248	84	U/l	84
37n10762j	44	04.10.1965	47.9917	1	187	93	3	0	7952481	IU/ml	7952481	6.9005		neg.	IU/ml	0	neg.	IU/ml	0	0	0	6.9005	1	0	1	neg.	IU/ml	TaqMan		< 25 IU/ml	175	U/l	175	45	3.88889	117	U/l	117	0.668571	171	U/l	171	63.3	U/l	63.3				42.4
3ajenucxk	35	12.02.1959	54.6361	0	152	94	2	0	876000	IU/ml	876000	5.9425	82400	neg.	IU/ml	0	neg.	IU/ml	0	0	0	5.9425	1	0	1	neg.	IU/ml	Amplicor		50 IU/ml	33	U/l	33	34	0.970588	25	U/l	25	0.757576	26	U/l	26	55	U/l	55				4.34
3cy1sevmj	39	28.06.1978	35.2583	1	172	85	3	0	65500	IU/ml	65500	4.81624	7890	< 12	IU/ml								0					Abbott Real Time PCR	Abbott Real Time	< 12	71	U/l	71	45	1.57778	47	U/l	47	0.661972	19	U/l	19	69	U/l	69
3ekxfyf26	142	25.11.1956	56.85	1	192	93	3	0	127125	IU/ml	127125	5.10423	332000	< 12	IU/ml	0	< 12	IU/ml	0	0	0	5.10423	1	< 12	1	558111	IU/ml	Abbott Real Time PCR	Abbott	< 12 IU/ml	177	U/l	177	45	3.93333	110	U/l	110	0.621469	60	U/l	60	54	U/l	54				60.1
3eqx4qglv	25	16.09.1975	38.0417	1	178	75.7	3	0	9090803	IU/ml	9090803	6.9586		0	IU/ml		< 12	IU/ml	12	1.07918		8.03778	1	0	1						67	U/l	67	45	1.48889	57	U/l	57	0.850746	43	U/l	43	70	U/l	70	6.7	KU/l	6.7	56.7
3fng9t4tw	39	15.05.1986	27.3778	1	168	64	3	0	868000	IU/ml	868000	5.93852		35	IU/ml				0	0	0	5.93852									442	U/l	442	45	9.82222	151	U/l	151	0.341629	54	U/l	54	88	U/l	88	7.19	KU/l	7.19	49
3fwux7012	44	02.06.1952	61.3306	1	165	76	2	1	8289961	IU/ml	8289961	6.91855	18000000	neg.	IU/ml	0	neg.	IU/ml	0	0	0	6.91855	1	0	1	neg.	IU/ml	TaqMan		< 25 KIU/ml	88.4	U/l	88.4	45	1.96444	89.9	U/l	89.9	1.01697	203	U/l	203	61.9	U/l	61.9				34.4
3g9ft1r9n	43	31.07.1979	34.1694	1	180	81.9	3	0		IU/ml				neg.	IU/ml																0.96	µmol/sl	57.6	45	1.28	0.78	µmol/sl	46.8	0.8125	0.3	µmol/sl	18
3gkvtpgp8	22	04.11.1973	39.9083	1	190	65	3	0	2290000	IU/ml	2290000	6.35984	65700	10	IU/ml		neg.	IU/ml	0	0		6.35984	1	0	1	neg.	IU/ml	TaqMan		ca. 0,01 KiU/ml	67	U/l	67	45	1.48889	44	U/l	44	0.656716	15	U/l	15	51	U/l	51	8.1	KU/l	8.1	64.5
3hl7n4nvp	22	18.08.1964	49.1194	1	170	58	3	0	1960000	IU/ml	1960000	6.29226		neg.	IU/ml		neg.	IU/ml	0	0		6.29226	1	0	1			TaqMan		0,01 KIU/ml	85	U/l	85	45	1.88889	89	U/l	89	1.04706	137	U/l	137	55	U/l	55	8.7	KU/l	8.7	62.6
3J3N1GF25	14	22.08.1963	50.1083	1	170	95	2	0	9259960	IU/ml	9259960	6.96661	4590000	<15	IU/ml	0	<15	IU/ml	0	0	0	6.96661	1	<15	1	<30	IU/ml	Sonstiges	PCR	15IU/ml	20	U/l	20	45	0.444444	25	U/l	25	1.25	26	U/l	26	66	U/l	66	9.02	KU/l	9.02	46.58
3klv4lrlm	6	26.03.1956	57.5139	0	160	63	3	0	4170106	IU/ml	4170106	6.62015		< 15	IU/ml	14	0	IU/ml	0	0	0	6.62015	1	0	1	0	IU/ml	TaqMan		0	44.4	U/l	44.4	34	1.30588	42.6	U/l	42.6	0.959459	26.4	U/l	26.4	80	U/l	80
3lt7u725c	22	09.06.1961	52.3111	1	186	66	3	0	1380	IU/ml	1380	3.13988		neg.	IU/ml		neg.	IU/ml	0	0		3.13988	1	0	1	neg.	IU/ml	TaqMan		ca. 0,01 KiU/ml	63	U/l	63	45	1.4	44	U/l	44	0.698413	48	U/l	48	87	U/l	87	7.4	KU/l	7.4	55.2
3LVTM3QYM	14	11.10.1977	35.9722	1	176	76	3	0	345280	IU/ml	345280	5.53817		201	IU/ml	2680000	<15	IU/ml	0	0	0	5.53817	1	<12	1	<15	IU/ml	Sonstiges	PCR	15	563	U/l	563	45	12.5111	214	U/l	214	0.380107	107	U/l	107	105	U/l	105	6.06	KU/l	6.06	60.9
3mfl7n8cd	8	03.01.1957	56.7444	1	180	90	2	0	10200000	IU/ml	10200000	7.0086	10200000	< 12	IU/ml	0	< 12	IU/ml	0	0	0	7.0086	1	0	1	neg.	IU/ml	Abbott Real Time PCR	Abbott	< 12	68	U/l	68	45	1.51111	127	U/l	127	1.86765	30	U/l	30	52	U/l	52
3mvfjxy58	35	22.12.1962	50.775	1	178	72	3	0	1050000	IU/ml	1050000	6.02119	286000	319000	IU/ml	213000	19500	IU/ml	19500	4.29003	13600	10.3112	1	11400	0	1810000	IU/ml	Amplicor		0,015 KIU/ml	52	U/l	52	45	1.15556	41	U/l	41	0.788462	68	U/l	68	57	U/l	57	9.1	KU/l	9.1	47.8
3N9NJHQ6C	8							0			1100000	6.04139	1100000			0
3nchawqn8	35	02.01.1979	34.7472	1	182	73	3	0	743000	IU/ml	743000	5.87099	806000	neg.	IU/ml	0	neg.	IU/ml	0	0	0	5.87099	1	0	1	neg.	IU/ml	Amplicor		50 IU/ml	380	U/l	380	45	8.44444	183	U/l	183	0.481579	64	U/l	64	73	U/l	73				4.56
3NQYNHAPX	7	30.08.1986	27.0861	0	163	52.5	3	0	362000	IU/ml	362000	5.55871	280000	0	IU/ml	0	0	IU/ml	0	0	0	5.55871	1	0	1	neg	IU/ml	TaqMan		<25 IU/ml	85	U/l	85	34	2.5				0	34	U/l	34	53	U/l	53	7079	U/l	7.079
3pv85x2w7	8	25.03.1977	36.5167	1	167	65	3	1	2980714	IU/ml	2980714	6.47432		< 12	IU/ml	0												Abbott Real Time PCR	Abbott	< 12	181	U/l	181	45	4.02222	122	U/l	122	0.674033	61	U/l	61	56	U/l	56	8.94	KU/l	8.94	4.6
3Q247A7A7	21	10.09.1981	32.0583	0	173	63	3	0	47514	IU/ml	47514	4.67682	12000	<12	IU/ml		<12	IU/ml	0	0	0	4.67682	1	<12	1	<12		Abbott Real Time PCR	real Time Abbott	<12	125	U/l	125	34	3.67647	220	U/l	220	1.76	35	U/l	35	100	U/l	100	8674	U/l	8.674	55.8
3q9h0pl3l	44	13.08.1979	34.1333	0	168	78	2	0	444165	IU/ml	444165	5.64754	812000	< 25	IU/ml	0	nd		0	0	0	5.64754	1	0	1	neg.	IU/ml	TaqMan		< 25	70.4	U/l	70.4	34	2.07059	49.3	U/l	49.3	0.700284	72.5	U/l	72.5	96.8	U/l	96.8				43.5
3qns5krem	35	28.12.1976	36.7583	1	176	85	3	0	333000	IU/ml	333000	5.52244	506000	neg.	IU/ml	14	neg.	IU/ml	0	0	0	5.52244	1	1330000	0	746000	IU/ml	TaqMan		0,043 KIU/ml	307	U/l	307	45	6.82222	247	U/l	247	0.80456	228	U/l	228	95	U/l	95				4.64
3QRYJMN5M	55	14.05.1963	50.3806	1	170	80	3	0	68700	IU/ml	68700	4.83696							0	0		4.83696		0	1	0		TaqMan		25 IU/ml	107	U/l	107	45	2.37778	91	U/l	91	0.850467	74	U/l	74	90	U/l	90	6.8	KU/l	6.8	49.9
3quagy6eu	8	08.05.1971	42.3972	1	194	95	3	0	2115799	IU/ml	2115799	6.32547		22	IU/ml		neg.	IU/ml	0	0		6.32547	1	0	1	neg.	IU/ml	TaqMan		15 IU/ml	76	U/l	76	45	1.68889	55	U/l	55	0.723684	18	U/l	18	78	U/l	78				4.7
3r2t2kp83	11	10.01.1974	39.725	0	174	70	3	0	869191	IU/ml	869191	5.93912	6500000	384	IU/ml		< NWG	IU/ml	15	1.17609		7.11521	1	0	1	neg	IU/ml	TaqMan		15 IU/ml	42	U/l	42	34	1.23529	27	U/l	27	0.642857	13	U/l	13	48	U/l	48
3rlyrqtcf	43	20.02.1974	39.6139	1	174	79	2	0	308000	IU/ml	308000	5.48855		308	IU/ml																2.01	µmol/sl	120.6	45	2.68	1.02	µmol/sl	61.2	0.507463	1.09	µmol/sl	65.4	1.2	µmol/sl	72				47
3smvs1jg8	8	20.05.1969	44.3639	0	184	84	3	0	653680	IU/ml	653680	5.81537		512	IU/ml		neg.	IU/ml	0	0		5.81537						Abbott Real Time PCR	Abbott	< 12	330	U/l	330	34	9.70588	157	U/l	157	0.475758	41	U/l	41	73	U/l	73				4.5
3sudk7g1p	11	01.03.1965	48.5833	0	174	92.9	3	0	616798	IU/ml	616798	5.79014	3350000	839	IU/ml	354	neg	IU/ml	0	0	0	5.79014	1	0	1	neg	IU/ml	TaqMan		15 IU/ml	73	U/l	73	34	2.14706	44	U/l	44	0.60274	21	U/l	21	56	U/l	56				38.6
3T5JQCNA5	7	17.08.1982	31.1222	0	162	50	3	0	12700000	IU/ml	12700000	7.1038	12700000			14	0	IU/ml	0	0	0	7.1038	1	0	1			TaqMan		25 IU/ml	195	U/l	195	34	5.73529				0	77	U/l	77	75	U/l	75	9.15	KU/l	9.15
3T76A8A46	1	17.06.1939	74.2889	1	172	75	2	0	3900000	IU/ml	3900000	6.59106		neg	IU/ml		neg.	IU/ml	0	0		6.59106	1	0	1	neg	IU/ml	TaqMan		<15 IU/ml	70	U/l	70	45	1.55556	63	U/l	63	0.9	24	U/l	24	118	U/l	118	6.82	KU/l	6.82	40
3u0c8757j	7	18.08.1988	25.1194	1	186	66	3	0	1400000	IU/ml	1400000	6.14613	298000	0	IU/ml	14	0	IU/ml	0	0	0	6.14613	1	0	1			TaqMan		<25 IU/ml	487	U/l	487	45	10.8222				0	101	U/l	101	86	U/l	86				4.68
3v0jcy135	43	12.01.1972	41.7194	1	173	84.5	3	0	147482	IU/ml	147482	5.16874		neg.	IU/ml																1.64	µmol/sl	98.4	45	2.18667	0.84	µmol/sl	50.4	0.512195	0.59	µmol/sl	35.4	1.32	µmol/sl	79.2				46.3
3V9SKS69H	17	06.07.1963	50.2361	1	178	70	3	0	4819078	IU/ml	4819078	6.68296		0	IU/ml								0					Sonstiges	PCR	<12-50 IU/ml	253	U/l	253	45	5.62222	151	U/l	151	0.596838	125	U/l	125	81	U/l	81	8.044	KU/l	8.044	454
3v9yflhy9	36	12.07.1963	50.2194	1	187	105	3	0	3200	KIU/ml	3200000	6.50515			IU/ml		0.43	KIU/ml	17900	4.25285	17900	10.758	1	973000	0			TaqMan		0,02 KIU/ml	110	U/l	110	45	2.44444	116	U/l	116	1.05455	187	U/l	187	66	U/l	66
3w663p3p5	8	15.02.1972	41.6278	1	175	90	3	0	82200	IU/ml	82200	4.91487	169000																		182	U/l	182	45	4.04444	76	U/l	76	0.417582	50	U/l	50	116	U/l	116				4.5
3ydpfq6wx	8	28.02.1966	47.5861	1	175	94	3	0	669000	IU/ml	669000	5.82543		nd																	65	U/l	65	45	1.44444	58	U/l	58	0.892308	227	U/l	227	90	U/l	90				43
41nwh58p3	44	04.07.1964	49.2417	1	180	90	3	1	2254252	IU/ml	2254252	6.353	1820000	83.3	IU/ml	34	neg.	IU/ml	0	0	0	6.353									89.1	U/l	89.1	45	1.98	118	U/l	118	1.32435	150	U/l	150	120	U/l	120				30.6
43pm6nef5	44	15.01.1958	55.7111	0	158	78	2	0	1159992	IU/ml	1159992	6.06445	2340000	< 25	IU/ml	14	neg.	IU/ml	0	0	0	6.06445	1	0	1	neg.	IU/ml	TaqMan		< 25	127	U/l	127	34	3.73529	87.3	U/l	87.3	0.687402	31.6	U/l	31.6	78.8	U/l	78.8				39
44DC9PYSH	35							0			270000	5.43136	270000			270000			0	0	0	5.43136
45en18sfd	44	28.03.1971	42.5083	0	171	72.3	3	0	390000	IU/ml	390000	5.59106	102000	nd		0	neg.	IU/ml	0	0		5.59106	1	0	1			TaqMan		< 25	71.4	U/l	71.4	34	2.1	62.9	U/l	62.9	0.880952	40.6	U/l	40.6	55.8	U/l	55.8				39.5
45vtkm6yl	11	15.07.1977	36.2111	1	180	85	3	0	4340000	IU/ml	4340000	6.63749		< NWG	IU/ml		<NWG	IU/ml	15	1.17609		7.81358	1	0	1	<NWG	IU/ml	TaqMan		< 15 IU/ml	52	U/l	52	45	1.15556	33	U/l	33	0.634615	15	U/l	15	53	U/l	53
475ur2tj0	44	16.11.1963	49.875	0	165	88	3	0	5425682	IU/ml	5425682	6.73445	1460000	740	IU/ml	1620	< 25	Kopien/ml	0	0	0	6.73445	1					TaqMan		< 25 KIU/ml	86.7	U/l	86.7	34	2.55	93.6	U/l	93.6	1.07958	185	U/l	185	73	U/l	73				38.3
477x79v0y	11	21.03.1992	21.5278	0	164	60	3	0	9279	IU/ml	9279	3.9675		<NWG	IU/ml								0					TaqMan		15 IU/ml	41	U/l	41	34	1.20588	30	U/l	30	0.731707	12	U/l	12	95	U/l	95
48DANEWDQ	44	03.01.1975	38.7444	1	185	99	3	0	1331881	IU/ml	1331881	6.12447	9400000	100	IU/ml	1200			0	0	0	6.12447									243	U/l	243	45	5.4	174	U/l	174	0.716049	160	U/l	160	88	U/l	88				48
4A4EWGKY3	7	01.04.1974	39.5	1	168	58	3	0	6730000	IU/ml	6730000	6.82802	6100000	0	IU/ml	0	0	IU/ml	0	0	0	6.82802	1	0	1	0	IU/ml	TaqMan		<25	66	U/l	66	45	1.46667				0	42	U/l	42	65	U/l	65	9.741	KU/l	9.741	54.7
4akcqg7wf	11	06.10.1971	41.9861	0	164	48	3	0	13440000	IU/ml	13440000	7.1284		< NWG	IU/ml		< NWG	IU/ml	15	1.17609		8.30449	1	0	1	<NWG	IU/ml	TaqMan		< 15 IU/ml	99	U/l	99	34	2.91176	33	U/l	33	0.333333	17	U/l	17	44	U/l	44
4c08v8jw3	64	22.09.1982	31.025	1	172	80	3	0	44221	IU/ml	44221	4.64563	3770		IU/ml	0															53	U/l	53	45	1.17778	52	U/l	52	0.981132	88	U/l	88	153	U/l	153	9.168	KU/l	9.168	7.7
4d6jc17a2	44	28.05.1976	37.3417	0	166	54	3	0	803221	IU/ml	803221	5.90484	726000	neg	IU/ml	14	neg	IU/ml	0	0	0	5.90484	1	0	1	neg	IU/ml	TaqMan		<0,25 KIU/l	89.8	U/l	89.8	34	2.64118	67.2	U/l	67.2	0.74833	33.3	U/l	33.3	89.9	U/l	89.9				42.9
4h7wlchh8	7	06.10.1985	27.9861	1	196	87	3	0	9150000	IU/ml	9150000	6.96142	7760000	0	IU/ml	0	0	IU/ml	0	0	0	6.96142	1	0	1			TaqMan		<25	185	U/l	185	45	4.11111	120	U/l	120	0.648649	125	U/l	125	64	U/l	64	7.186	KU/l	7.186	4.31
4j7dapwu1	2	08.06.1964	49.3139	1	183	87	3	0	52000	IU/ml	52000	4.716		< 25	IU/ml		neg.	IU/ml	0	0	0	4.716	1	< 25 (neg.)	1	< 25 (neg.)	IU/ml			10 IU/ml	1.31	µkat/l	78.5843	45	1.74632	0.8	µkat/l	47.9904	0.610687				1.24	µkat/l	74.3851				40
4k7tf6scp	2	16.04.1962	51.4583	1	176	72	3	0	716000	IU/ml	716000	5.85491	398000	< 25	IU/ml	0	neg.	IU/ml	0	0	0	5.85491	1	0	1	neg.	IU/ml	TaqMan		15 IU/ml	2.81	µkat/l	168.566	45	3.74592	2.02	µkat/l	121.176	0.718861	1.84	µkat/l	110.378
4KXT86QF7	47	23.10.1968	44.9389	0	159	47	3	0	205000	IU/ml	205000	5.31175	264000				<20	IU/ml	0	0	0	5.31175	1	0	1	0	IU/ml	TaqMan			19	U/l	19	34	0.558824	18	U/l	18	0.947368	16	U/l	16	66	U/l	66	9.7	KU/l	9.7	44.2
4L8856AMS	22	10.10.1963	49.975	0	158	70	3	1	24400	IU/ml	24400	4.38739	86000				neg.	IU/ml	0	0	0	4.38739	1	0	1			TaqMan		0,01 KIU/ml	67	U/l	67	34	1.97059	69	U/l	69	1.02985	97	U/l	97	87	U/l	87	8.9	KU/l	8.9	48.7
4p5sl8agt	21	21.04.1980	33.4444	0	160	60	3	0	327000	IU/ml	327000	5.51455	301000	neg	IU/ml	0	<25	IU/ml	0	0	0	5.51455	1					TaqMan		15 IU/ml	3.72	µkat/l	223.155	34	6.56339	1.65	µkat/l	98.9802	0.443548	1.13	µkat/l	67.7864
4q73rrtjw	130	01.02.1941	72.6667	0	150	53	2	0	31462	IU/ml	31462	4.49779	940000	1	IU/ml	14	neg.	IU/ml	0	0	0	4.49779	1	0	1	neg.	IU/ml	TaqMan		< 43	42	U/l	42	34	1.23529	37	U/l	37	0.880952	28	U/l	28	79	U/l	79
4qs3str4s	2	05.05.1979	34.4056	1	176	75	3	0	< 9900000	IU/ml	9900000	6.99564		100	IU/ml		< 25 neg.	IU/ml	0	0	0	6.99564	1	0	1	neg.	IU/ml	TaqMan		10 IU/ml	1.54	µkat/l	92.3815	45	2.05292	0.52	µkat/l	31.1938	0.337662
4qx82xklv	130	31.01.1970	43.6694	1	170	99.1	3	0	2141040	IU/ml	2141040	6.33062		neg.	IU/ml	14	neg.	IU/ml	0	0	0	6.33062	1	0	1	neg.	IU/ml	TaqMan		< 15 IU/ml	114	U/l	114	45	2.53333	59	U/l	59	0.517544	35	U/l	35	75	U/l	75	10.871	KU/l	10.871
4s6qs47v3	25	20.09.1977	36.0306	0	175	61	3	0	132054	IU/ml	132054	5.12075		neg.	IU/ml		18	IU/ml	18	1.25527		6.37602	1			0	IU/ml	Sonstiges	PCR	12	145	U/l	145	34	4.26471	73	U/l	73	0.503448	32	U/l	32
4sdaygw11	13	25.09.1974	39.0167	1	172	90	2	0	7610000	IU/ml	7610000	6.88138	2290000	< 25	IU/ml	0	neg.	IU/ml	0	0	0	6.88138	1	0	1	neg.	IU/ml	TaqMan		15 IU/ml	353	U/l	353	45	7.84444	110	U/l	110	0.311615	104	U/l	104	78	U/l	78				47.3
4t8cdu4vl	130	08.06.1961	52.3139	1	179	65	3	0	332231	IU/ml	332231	5.52144	73500	< 15	IU/ml	0	neg.	IU/ml	0	0	0	5.52144	1	0	1	903592	IU/ml	TaqMan		< 43	489	U/l	489	45	10.8667	257	U/l	257	0.525562	250	U/l	250	104	U/l	104				55.8
4v3scxepl	25	26.03.1978	35.5139	1	162	62	3	1	410346	IU/ml	410346	5.61315		neg.	IU/ml		neg.	IU/ml	0	0		5.61315	1	0	1		IU/ml	Sonstiges	PCR	0	347	U/l	347	45	7.71111	379	U/l	379	1.09222	360	U/l	360
4w922xs8c	1	17.06.1968	45.2889	0	156	54	2	0	21300	IU/ml	21300	4.32838	21300	neg	IU/ml	0	neg	IU/ml	0	0		4.32838	1	0	1	neg	IU/ml	TaqMan		>15 IU/ml	80	U/l	80	34	2.35294	45	U/l	45	0.5625	23	U/l	23	50	U/l	50	6.99	KU/l	6.99	42
4xgyxgu1s	13	20.02.1973	40.6139	1	185	103	3	0	1290000	IU/ml	1290000	6.11059	195000	298	IU/ml	16200	neg.	IU/ml	0	0		6.11059	1	0	1	neg.	IU/ml	TaqMan		15 IU/ml	157	U/l	157	45	3.48889	77	U/l	77	0.490446	89	U/l	89	82	U/l	82				49
4y86jx0ua	25	22.05.1978	35.3583	1	178	83	3	0	1225090	IU/ml	1225090	6.08817		13	IU/ml		neg.	IU/ml	0	0		6.08817	1	0	1	0	IU/ml	Sonstiges	PCR	0 IU/ml	145	U/l	145	45	3.22222	50	U/l	50	0.344828	52	U/l	52	66	U/l	66
4ys4taw09	13	21.06.1976	37.2778	1	173	85.5	3	0	1220000	IU/ml	1220000	6.08636	7870	neg.	IU/ml	0	neg	IU/ml	0	0	0	6.08636	1	0	1	neg	IU/ml	TaqMan		15 IU/ml	56	U/l	56	45	1.24444	33	U/l	33	0.589286	61	U/l	61	81	U/l	81				59.1
51q0htw7n	25	28.02.1958	55.5861	0	168	55	3	0	93355	IU/ml	93355	4.97014		13084	IU/ml		neg.	IU/ml	0	0		4.97014	1	0	1	32199	IU/ml	Sonstiges	PCR	0	84	U/l	84	34	2.47059	66	U/l	66	0.785714	61	U/l	61	69	U/l	69	9.5	KU/l	9.5	7.8
523jncdtv	7	19.01.1972	41.7	1	175	60	3	0	642000	IU/ml	642000	5.80754	424000	1140	IU/ml	2530	0	IU/ml	0	0	0	5.80754	1	0	1	0	IU/ml	TaqMan		<25	51	U/l	51	45	1.13333				0	53	U/l	53	70	U/l	70	11.23	KU/l	11.23
530f4j87y	22	14.08.1970	43.1306	1	198	129	3	1	280000	IU/ml	280000	5.44716		neg.	IU/ml		neg	IU/ml	0	0		5.44716						TaqMan		0,01 KIU/ml	145	U/l	145	45	3.22222	176	U/l	176	1.21379	375	U/l	375	114	U/l	114	4.4	KU/l	4.4	51.4
536tt9927	25	30.11.1973	39.8361	0	159	66	3	0	6320000	IU/ml	6320000	6.80072		0	IU/ml		0	IU/ml	0	0		6.80072	1	0	1	0	IU/ml	Sonstiges	PCR	0	122	U/l	122	34	3.58824	74	U/l	74	0.606557	47	U/l	47							7.5
53f032xxm	7	15.12.1956	56.7944	0	160	65	2	0	4910000	IU/ml	4910000	6.69108	4800000	0	IU/ml	0	0	IU/ml	0	0	0	6.69108	1	0	1	0	IU/ml	TaqMan		<25	15	U/l	15	34	0.441176				0	30	U/l	30	69	U/l	69	5.924	KU/l	5.924	3.86
54txs411c	36			1	178	63	3	0	1160000	IU/ml	1160000	6.06446	16000	< 0,02	IU/ml	352000	neg.	IU/ml	0	0	0	6.06446	1	< 0,02	1			TaqMan		< 0,02	134	U/l	134	45	2.97778	173	U/l	173	1.29104	277	U/l	277	92	U/l	92
551HHMV60	44	15.02.1987	26.6278	0	163	52	3	0	16554	IU/ml	16554	4.2189	10000	neg	IU/ml	0	neg	IU/ml	0	0	0	4.2189	1	0	1			TaqMan		<25kIU/l	28.7	U/l	28.7	34	0.844118	32.2	U/l	32.2	1.12195	27.4	U/l	27.4	64.6	U/l	64.6				41
5605c4eux	22	04.02.1944	69.6583	0	164	95	3	1	133000	IU/ml	133000	5.12385	89600			0	neg	IU/ml	0	0	0	5.12385	1	0	1			TaqMan		0.01	80	U/l	80	34	2.35294	102	U/l	102	1.275	36	U/l	36	94	U/l	94	6.6	KU/l	6.6	48.8
560cve7w0	25	04.12.1931	81.825	0	168	53.5	3	0	1093776	IU/ml	1093776	6.03893		neg.	IU/ml		neg.	IU/ml	0	0		6.03893	1	0	1	0	IU/ml	Sonstiges	PCR	0 IU/ml	29	U/l	29	34	0.852941	32	U/l	32	1.10345	39	U/l	39				9.7	KU/l	9.7	7.1
56dj07c29	7	02.07.1982	31.2472	0	170	62	3	0	604000	IU/ml	604000	5.78104	1240000	0	IU/ml	19.1	0	IU/ml	0	0	0	5.78104	1	0	1	0	IU/ml	TaqMan		<25	101	U/l	101	34	2.97059	49	U/l	49	0.485149	44	U/l	44	83	U/l	83	7.932	KU/l	7.932	4.28
5727240Q9	39							0			313000	5.49554	313000
5859qfe6v	22	27.04.1982	31.4278	1	175	72	3	0	136000	IU/ml	136000	5.13354		neg.	IU/ml		neg	IU/ml	0	0		5.13354	1	0	1						638	U/l	638	45	14.1778	218	U/l	218	0.341693	19	U/l	19	112	U/l	112	9.2	KU/l	9.2	59.9
59uhcfufq	7	20.12.1973	39.7806	1	175	80	3	0	5960000	IU/ml	5960000	6.77525	4160000	<25	IU/ml	0	0	IU/ml	0	0	0	6.77525	1	0	1	0	IU/ml	TaqMan		<15	384	U/l	384	45	8.53333				0	181	U/l	181	66	U/l	66	8.32	KU/l	8.32	4.01
59wgrc05e	39	21.03.2011	2.52778	1	178	86	3	0	2990000	IU/ml	2990000	6.47567		<15	IU/ml		neg	IU/ml	0	0	0	6.47567	1	<12	1	neg	IU/ml	TaqMan		12 IU/ml	46	U/l	46	45	1.02222	32	U/l	32	0.695652	29	U/l	29	77	U/l	77				47
5A53GGSQ2	22	02.10.1981	31.9972	1	181	74	3	0	1900000	IU/ml	1900000	6.27875											0					TaqMan		0.01	86	U/l	86	45	1.91111	41	U/l	41	0.476744	38	U/l	38	52	U/l	52	8.5	KU/l	8.5	56.8
5anp6vqam	44	29.12.1982	30.7556	1	185	80	3	0	5697876	IU/ml	5697876	6.75571	6050000	6300	IU/ml	5080							0					TaqMan		< 25	147	U/l	147	45	3.26667	90.5	U/l	90.5	0.615646	39.7	U/l	39.7	56	U/l	56				48.2
5ct7lv485	7	17.01.1962	51.7056	1	172	70	3	0	55900000	IU/ml	55900000	7.74741	24000000	0	IU/ml	14	0	IU/ml	0	0	0	7.74741	1	0	1	0	IU/ml	TaqMan		<25	219	U/l	219	45	4.86667				0	38	U/l	38	74	U/l	74	8.685	KU/l	8.685	4.22
5FFRQVNL8	47							0								220000
5GTF10YFM	13	24.08.1993	20.1028	1	187	85	3	0	7420000	IU/ml	7420000	6.8704	2900000	7450	IU/ml	3000	1910000	IU/ml	1910000	6.28103		13.1514	1	1910000	0			TaqMan		15 IU/ml	146	U/l	146	45	3.24444	76	U/l	76	0.520548	65	U/l	65	133	U/l	133				51.1
5jqxevkt7	25	28.05.1965	48.3417	1	176	78	3	1	3483846	IU/ml	3483846	6.54206																			45	U/l	45	45	1	71	U/l	71	1.57778	124	U/l	124	52	U/l	52	6	KU/l	6
5jt417lcj	33	21.10.1976	36.9444	1	178	95	3	0	43100	IU/ml	43100	4.63448		< 10	IU/ml																91	U/l	91	45	2.02222	47	U/l	47	0.516484	46	U/l	46	81	U/l	81				62.2
5K2KUYQ76	47	21642	54.4972	1	178	78	3	1			750000	5.87506	750000																				102	45	2.26667			79	0.77451			102			80			6.6
5lj2n95mh	47	29.07.1971	42.1722	1	165	54	3	0	10300000	IU/ml	10300000	7.01284		<25	IU/ml	14	<20	IU/ml	0	0	0	7.01284	1	< 20	1	< 20	IU/ml	TaqMan		20 IU/ml	104	U/l	104	45	2.31111	44	U/l	44	0.423077	36	U/l	36	50	U/l	50
5n9m8xn9r	47	21.07.1976	37.1944	1	172	59	3	0	19500000	IU/ml	19500000	7.29003	6580000	45000	IU/ml	32300	<20	IU/ml	0	0	0	7.29003	1	< 20	1			TaqMan		20 IU/ml	57	U/l	57	45	1.26667	57	U/l	57	1	20	U/l	20	66	U/l	66
5nm07fp4e	36	29.07.1964	49.1722	1	180	81	3	0	6330	KIU/ml	6330000	6.8014	17.7	1400	IU/ml	2940	nd	IU/ml	0	0	0	6.8014	1	0	1	neg.	IU/ml	TaqMan		0,02 IU/ml	89	U/l	89	45	1.97778	55	U/l	55	0.617978	42	U/l	42	62	U/l	62
5pv140xl5	36	16.04.1970	43.4583	1	170	72.5	3	0	379000	IU/ml	379000	5.57864		440	IU/ml	1030	0.02	KIU/ml	0	0	0	5.57864	1	positiv	0	pos.	IU/ml	TaqMan		0,02 KIU/ml	125	U/l	125	45	2.77778	96	U/l	96	0.768	107	U/l	107	149	U/l	149
5utxs411c	36	20.06.1977	36.2806	1	178	63	3	1	1160000	IU/ml	1160000	6.06446	16000	< 0,02	IU/ml	352000	neg.	IU/ml	0	0	0	6.06446	1	< 0,02	1			TaqMan		< 0,02	134	U/l	134	45	2.97778	173	U/l	173	1.29104	277	U/l	277	92	U/l	92
5ww4mmy46	94	25.04.1958	55.4333	0	171	60	3	0	406003	IU/ml	406003	5.60853		nd	IU/ml	337	neg. 12	IU/ml	0	0	0	5.60853	1	0	1	neg.	IU/ml	Sonstiges	PCR	< 12				34						19	U/l	19	46	U/l	46
5XGRQHSQ5	55	27.01.1958	55.6778	1	191	110	3	0	2970000	IU/ml	2970000	6.47276		<25	IU/ml	14	neg	IU/ml	0	0	0	6.47276		0	1	0		TaqMan		25-391 Millionen	321			45		230				132			94			8.8			41.8
60ffqthd7	36	14.12.1962	50.7972	0	168	60	3	0	316	KIU/ml	316000	5.49969	316000	< 0,02	IU/ml								1	0	1	< 0,02	IU/ml	TaqMan		< 0,02	41	U/l	41	34	1.20588	99	U/l	99	2.41463	34	U/l	34	58	U/l	58
61c0pydj4	36	09.10.1964	48.9778	1	173	60	3	0	711000	IU/ml	711000	5.85187		< 0,02	IU/ml	0							1	<0,02	1	<0,02	IU/ml	TaqMan		<0,02	33	U/l	33	45	0.733333	42	U/l	42	1.27273	186	U/l	186	109	U/l	109
61FHJU2M0	6	26.11.1957	55.8472	1	177	100	3	0	1413614	IU/ml	1413614	6.15033		0	IU/ml	0	0	IU/ml	0	0	0	6.15033	1	0	1	0	IU/ml	TaqMan		0	217	U/l	217	45	4.82222	146	U/l	146	0.672811	164	U/l	164	86	U/l	86	6.89	KU/l	6.89	4050
623kqhltk	8	22.12.1971	41.775	0	175	75	2	0	nd																						114	U/l	114	34	3.35294	90	U/l	90	0.789474	172	U/l	172	71	U/l	71
62L64HPHQ	55	25.04.1973	40.4333	1	181	73.1	3	0	1820000	IU/ml	1820000	6.26007		85	IU/ml	110	neg	IU/ml	0	0	0	6.26007				nd					52	U/l	52	45	1.15556	44	U/l	44	0.846154	40	U/l	40	80	U/l	80	15	KU/l	15	59.2
632C67DLF	47	30.11.1966	46.8361	1	178	77	3	1	4880000	IU/ml	4880000	6.68842	1960000	29	IU/ml	1900	neg	IU/ml	0	0		6.68842		0	1			TaqMan		20 IU/ml	91	U/l	91	45	2.02222	61	U/l	61	0.67033	55	U/l	55	39	U/l	39	7.7	KU/l	7.7
659wefr0h	8	29.04.1968	45.4222	0	166	68	3	0	2614270	IU/ml	2614270	6.41735		< 12	IU/ml		neg.	IU/ml	0	0		6.41735						Abbott Real Time PCR	Abbott	< 12	372	U/l	372	34	10.9412	203	U/l	203	0.545699	73	U/l	73	56	U/l	56	5.45	KU/l	5.45	4
67938fem5	25	29.07.1982	31.1722	1	187	83	3	0	3819455	IU/ml	3819455	6.582		< 12	IU/ml		0	IU/ml	0	0		6.582									60	U/l	60	45	1.33333	46	U/l	46	0.766667	78	U/l	78	74	U/l	74	7.5	KU/l	7.5	48.8
687WWJV48	47	28788	34.9333	1	173	55.8	3	0			620000	5.79239	620000			33			0	0		5.79239		0	1	0		TaqMan		20			112	45	2.48889			58	0.517857			22			116
68g3j8aka	25	19.05.1955	58.3667	1	186	83	3	0	474403	IU/ml	474403	5.67615		16930	IU/ml								0								31	U/l	31	45	0.688889	44	U/l	44	1.41935	41	U/l	41							52.4
6cyrtd0rs	25	23.01.1976	37.6889	1	178	85	3	0	186796	IU/ml	186796	5.27137		neg.	IU/ml		neg.	IU/ml	0	0		5.27137	0					Sonstiges	PCR	0	160	U/l	160	45	3.55556	67	U/l	67	0.41875	94	U/l	94	98	U/l	98				61
6f7hh1eay	25	08.12.1961	51.8139	1	178	80	3	0	46100	IU/ml	46100	4.6637		neg.	IU/ml		neg.	IU/ml	0	0		4.6637	1	0	1			Sonstiges	PCR	0	61	U/l	61	45	1.35556	62	U/l	62	1.01639	153	U/l	153
6jfayu9ed	25	26.08.1977	36.0972	1	184	81.8	2	0	1779792	IU/ml	1779792	6.25037		neg.	IU/ml		0	IU/ml	0	0		6.25037	1	0	1	0	IU/ml	Sonstiges	PCR	0	95	U/l	95	45	2.11111	40	U/l	40	0.421053	17	U/l	17	58	U/l	58				57.9
6k406psgq	6	24.01.1954	59.6861	0	168	89	3	0	1178796	IU/ml	1178796	6.07144		2244	IU/ml	2520	0	IU/ml	0	0	0	6.07144	1	0	1	0	IU/ml	TaqMan		0	97.8	U/l	97.8	34	2.87647	49.2	U/l	49.2	0.503067	40.2	U/l	40.2	91	U/l	91	10.2	KU/l	10.2	54.6
6l14r1qlr	21	24.09.1958	55.0194	1	186	85		0	487060	IU/ml	487060	5.68758		<12	IU/ml		< 12	IU/ml	12	1.07918		6.76676	1	< 12	1	<12	IU/ml	Abbott Real Time PCR	Real Time Aabbott	<12 iu/ml	344	U/l	344	45	7.64444	108	U/l	108	0.313953	178	U/l	178	117	U/l	117	8.328	KU/l	8.328
6n4x7chfs	25	20.08.1957	56.1139	1	179	78	3	0	116842	Kopien/ml	44939.2	4.65263			IU/ml		0	IU/ml	0	0		4.65263						Abbott Real Time PCR	Abbott Realtime PCR	0	86	U/l	86	45	1.91111	83	U/l	83	0.965116	205	U/l	205	92	U/l	92
6NCX72CQP	13	26.06.1974	39.2639	0	158	75	2	0	9340000	IU/ml	9340000	6.97035	3400000	125	IU/ml	96			0	0	0	6.97035									49	U/l	49	34	1.44118	29	U/l	29	0.591837	25	U/l	25	70	U/l	70				44.2
6nq30k6t0	118	27.11.1973	39.8444	1	172	68	3	0	63000	IU/ml	63000	4.79934	31400																		137	U/l	137	45	3.04444	121	U/l	121	0.883212	389	U/l	389	112	U/l	112				51
6pjt3m43t	25	11.07.1965	48.2222	1	180	105	2	0	25260859	IU/ml	25260859	7.40245		0	IU/ml		0	IU/ml	0	0		7.40245	1	0	1	0	IU/ml	Sonstiges	PCR	12	30	U/l	30	45	0.666667	56	U/l	56	1.86667	176	U/l	176	53	U/l	53	9.3	KU/l	9.3
6pwg7hng7	118	01.12.1981	31.8333	1	179	77	3	1	627000	IU/ml	627000	5.79727																TaqMan		25 IU/ml	52	U/l	52	45	1.15556	63	U/l	63	1.21154
6PY0YGR3P	44	10.05.1971	42.3917	1	175	70	3	0	1863518	IU/ml	1863518	6.27033	4400000																		362	U/l	362	45	8.04444	222	U/l	222	0.61326	104	U/l	104	74	U/l	74				48
6qtwwsn17	21	22.10.1950	62.9417	1	186	88.9	3	0	822130	IU/ml	822130	5.91494		520	IU/ml		12	IU/ml	12	1.07918	15	6.99412	1	schwach pos.	0	109240	IU/ml	Abbott Real Time PCR	Realtime Abbott	12 IU/ml	121	U/l	121	45	2.68889	83	U/l	83	0.68595	178	U/l	178	84	U/l	84	4932	U/l	4.932	55.9
6R8LG3CQ6	7	24.06.1965	48.2694	0	170	64	2	0	565000	IU/ml	565000	5.75205	312000	2090	IU/ml		neg	IU/ml	0	0	0	5.75205	1	0	1	neg.	IU/ml	TaqMan		<25 IU/ml	67	U/l	67	34	1.97059				0	27	U/l	27	77	U/l	77	8.785	KU/l	8.785
6RSU2135G	7	17.08.1962	51.1222	0	162	52.8	3	0	5710000	IU/ml	5710000	6.75664	13000000										0			4870000		TaqMan		25IU/ml	49	U/l	49	34	1.44118				0	16	U/l	16	71	U/l	71	8.404	KU/l	8.404
6s7xr2mmf	118	01.01.1973	40.75	1	181	72	3	1	2.96	IU/ml	29.6	1.47129	1.21		IU/ml		neg.	IU/ml	0	0		1.47129	1	0	1			TaqMan			96	U/l	96	45	2.13333	112	U/l	112	1.16667	96	U/l	96	122	U/l	122				49
6syhn3f55	118	01.06.1966	47.3333	1	175	68	3	0	850000	IU/ml	850000	5.92942																TaqMan		25 IU/ml	50	U/l	50	45	1.11111	37	U/l	37	0.74	43	U/l	43
6ujyl8p4n	13	31.07.1976	37.1694	0	163	70	3	0		IU/ml	33800	4.52892	33800	neg.	IU/ml		neg.	IU/ml	0	0		4.52892	1	0	1	neg.	IU/ml	TaqMan		15 IU/ml	69	U/l	69	34	2.02941	36	U/l	36	0.521739	15	U/l	15	55	U/l	55				41.8
6uwwx1yw0	118	12.09.1949	64.0528	0	158	89	2	1	17900	IU/ml	17900	4.25285	83000	8750	IU/ml	14												TaqMan			233	U/l	233	34	6.85294	148	U/l	148	0.635193	262	U/l	262	107	U/l	107
6vg35l51e	21	10.07.1949	64.225	0	160	89	3	0	242900	IU/ml	242900	5.38543		90	IU/ml		< 12	IU/ml	12	1.07918		6.46461	1	< 12	1	<12	IU/ml	Abbott Real Time PCR	Real Time Abbott	< 12 IU/ml	69	U/l	69	34	2.02941	53	U/l	53	0.768116	47	U/l	47	48	U/l	48	13.579	KU/l	13.579	60.3
6vnde90qx	13	17.07.1953	60.2056	1	181	90	3	1	2210000	IU/ml	2210000	6.34439	233000	neg.	IU/ml	14	neg	IU/ml	0	0	0	6.34439	1	0	1	neg	IU/ml	TaqMan		15 IU/ml	377	U/l	377	45	8.37778	229	U/l	229	0.607427	80	U/l	80	67	U/l	67				44.5
6w7lr5qdv	21	25.10.1965	47.9333	1	181	86	3	0	2100000	IU/ml	2100000	6.32222		20	IU/ml		< 12	IU/ml	12	1.07918		7.4014	1	<12	1	<12	IU/ml	Abbott Real Time PCR	Real Time Abbott	<12	441	U/l	441	45	9.8	196	U/l	196	0.444444	318	U/l	318	62	U/l	62				58.5
6wq2l0umx	33	20.03.1965	48.5306	0	166	53	3	0	334000	IU/ml	334000	5.52375		< 10	IU/ml																97	U/l	97	34	2.85294	72	U/l	72	0.742268	44	U/l	44				57.4	µkat/l	3.44331	57.4
6y260c8hs	21	08.02.1982	31.6472	0	170	58	3	0	500670	IU/ml	500670	5.69955		< 12	IU/ml		< 12	IU/ml	0	0	0	5.69955	1	< 12	1	<12	IU/ml	Abbott Real Time PCR	Realtime Abbott	< 12 IU/ml	93	U/l	93	34	2.73529	67	U/l	67	0.72043	33	U/l	33	47	U/l	47				58.9
709NUG9VS	22	28.09.1950	63.0083	0	162	83	2	0	8500	IU/ml	8500	3.92942	49000	neg	IU/ml	0	neg	IU/ml	0	0	0	3.92942	1	0	1	neg.	IU/ml	TaqMan		0,01 kUI/ml	75	U/l	75	34	2.20588	60	U/l	60	0.8	47	U/l	47	110	U/l	110	9.9	KU/l	9.9	60.1
70hdvwx6y	33	15.11.1984	28.8778	1		71	3	0	2320000	IU/ml	2320000	6.36549		< 10	IU/ml																130	U/l	130	45	2.88889	47	U/l	47	0.361538	39	U/l	39	60	U/l	60	9.94	KU/l	9.94	65.3
7226uw1ew	21	20.04.1954	59.4472	1	171	64	3	0	2170	IU/ml	2170	3.33646		150	IU/ml		< 12	IU/ml	12	1.07918		4.41564	1	100	0			Abbott Real Time PCR	Real Time Abbott	12	315	U/l	315	45	7	184	U/l	184	0.584127	43	U/l	43	55	U/l	55	5.883	KU/l	5.883	60.4
722c29r83	33	12.02.1961	52.6361	1	178	86	3	0	599000	IU/ml	599000	5.77743																			281	U/l	281	45	6.24444	310	U/l	310	1.1032	301	U/l	301				6.38	KU/l	6.38	53.2
72hj5g68a	85	23.01.1961	52.6889	1	180	74	3	0	860000	IU/ml	860000	5.9345		<10	IU/ml		< 10	IU/ml	10	1		6.9345	1	< 10	1	< 10	IU/ml	TaqMan		10 IU/ml				45						21	U/l	21	57	U/l	57				58.1
72wls6j2v	42	01.01.1974	39.75	1	185	109	3	0		IU/ml				75	IU/ml		nd						1	0	1	<25	IU/ml	TaqMan		<25	252	U/l	252	45	5.6	138	U/l	138	0.547619	109	U/l	109	83	U/l	83	7.866	KU/l	7.866	4.7
75vm0lc4d	21	20.09.1952	61.0306	1	175	77	3	0	7400000	IU/ml	7400000	6.86923		30	IU/ml	14	< 12	IU/ml	0	0	0	6.86923	1	<12	1	207434	IU/ml	Abbott Real Time PCR	Realtime Abbott	12 IU/ml	93	U/l	93	45	2.06667	66	U/l	66	0.709677	48	U/l	48	67	U/l	67
77gy9meej	85	09.11.1978	34.8944	1	173	78.2	3	0	2300	IU/ml	2300	3.36173		<10	IU/ml		<10	IU/ml	10	1		4.36173	1	< 10	1	< 10	IU/ml	TaqMan		10 IU/ml	53	U/l	53	45	1.17778	42	U/l	42	0.792453	23	U/l	23	124	U/l	124				66.5
78nmhhwcq	28	15.11.1981	31.8778	0			3	0	531000	IU/ml	531000	5.72509	34600	grenzwertig	IU/ml	0	neg	IU/ml	0	0	0	5.72509	1	0	1	neg.	IU/ml	TaqMan		15	87	U/l	87	34	2.55882	60	U/l	60	0.689655	19	U/l	19	69	U/l	69				4.1
7953MKTTT	47	21445	55.0389	1	172	95	2	1	103565		130000	5.11394	130000	<11					0	0		5.11394		0	1	<11		Amplicor		11			42	45	0.933333			57	1.35714			61			89
79us1xpf5	28	09.11.1985	27.8944	1	175		3	0	473x10 3	IU/ml	473000	5.67486	41700	grenzwertig	IU/ml	0	neg.	IU/ml	0	0	0	5.67486	1	0	1	neg.	IU/ml	TaqMan		15IU/ml	45	U/l	45	45	1	45	U/l	45	1	111	U/l	111	62	U/l	62
7ag5m6mw6	47	10.10.1958	54.975	1	187	90	3	0	1300000	IU/ml	1300000	6.11394	180000	neg.	IU/ml	14	< 20	IU/ml	0	0	0	6.11394	1	<20	1	neg.	IU/ml	TaqMan		20 IU/ml	32	U/l	32	45	0.711111	24	U/l	24	0.75	60	U/l	60	77	U/l	77	13.1	KU/l	13.1	55.3
7cpkmhkp5	23	13.12.1938	74.8	1	180	76	3	1	175200	IU/ml	175200	5.24353	863000	< 0,01	IU/ml	0							0								239	U/l	239	45	5.31111	265	U/l	265	1.10879	469	U/l	469	139	U/l	139
7cuay1yrn	47	01.08.1964	49.1667	1	180	83	3	0	4200000	IU/ml	4200000	6.62325		<20	IU/ml	0	<20	IU/ml	0	0	0	6.62325	1	< 20	1			TaqMan		20 IU/ml	416	U/l	416	45	9.24444	536	U/l	536	1.28846	430	U/l	430	169	U/l	169	9.2	KU/l	9.2
7dsrcqqre	28	11.07.1975	38.2222	1	165		3	0	559000	IU/ml	559000	5.74741	559000	neg.	IU/ml	0							0					TaqMan		15IU/ml	94	U/l	94	45	2.08889	56	U/l	56	0.595745	41	U/l	41	99	U/l	99				4.6
7f5uuq16l	47	17.12.1961	51.7889	1	184	76	3	0	1010000	IU/ml	1010000	6.00432	52300	<20	IU/ml	0	<20	IU/ml	0	0	0	6.00432	1	< 20	1	< 20	IU/ml	TaqMan		20 IU/ml	53	U/l	53	45	1.17778	25	U/l	25	0.471698	54	U/l	54	60	U/l	60
7g40dy6dl	47	01.01.1970	43.75	1	182	97	3	0	1580000	IU/ml	1580000	6.19866	45500										0					TaqMan		20 IU/ml	429	U/l	429	45	9.53333	229	U/l	229	0.5338	221	U/l	221	56	U/l	56
7gh074uwc	44	17.11.1956	56.8722	0	161	50	2	0	448200	IU/ml	448200	5.65147	843000	neg	IU/ml	0	neg	IU/ml	0	0	0	5.65147	1	0	1	neg	IU/ml	TaqMan		< 25	30.6	U/l	30.6	34	0.9	29	U/l	29	0.947712	39.1	U/l	39.1	34	U/l	34				43.3
7h84psfvf	13	13.07.1952	61.2167	1	180	90	3	0	1750000	IU/ml	1750000	6.24304	103000	neg.	IU/ml	0	neg.	IU/ml	0	0		6.24304	1	0	1	neg.	IU/ml	TaqMan		15 IU/ml	140	U/l	140	45	3.11111	108	U/l	108	0.771429	47	U/l	47	80	U/l	80				48
7hlrsrgmp	28	04.08.1950	63.1583	1	176	75	3	1	20300000	IU/ml	20300000	7.3075	1120000	grenzwertig	IU/ml		neg.	IU/ml	0	0		7.3075	1	0	1			TaqMan		15IU/ml				45						198	U/l	198	91	U/l	91	7.3	KU/l	7.3	4.2
7jgqwgx9u	13	11.12.1955	57.8056	1	186	87	3	0	23000000	IU/ml	23000000	7.36173	12700000	142	IU/ml	51	neg	IU/ml	0	0	0	7.36173	1	0	1	20200000	IU/ml	TaqMan		15 IU/ml	54	U/l	54	45	1.2	42	U/l	42	0.777778	51	U/l	51	47	U/l	47				48
7ju9lq66h	6	19.11.1964	48.8667	0	177	73	3	0	2100116	IU/ml	2100116	6.32224		84	IU/ml	31	0	IU/ml	0	0	0	6.32224	1	0	1	0	IU/ml	TaqMan		0	52.8	U/l	52.8	34	1.55294	43.8	U/l	43.8	0.829545	16.8	U/l	16.8	58	U/l	58	9.19	KU/l	9.19	55.7
7l828rne3	47	05.12.1978	34.8222	1	181	68	2	0	2500000	IU/ml	2500000	6.39794	624000	<25	IU/ml	0	<20	IU/ml	0	0	0	6.39794	1	<20	1			TaqMan		20 IU/ml	47	U/l	47	45	1.04444	25	U/l	25	0.531915	19	U/l	19	79	U/l	79	7.8	KU/l	7.8	62.7
7l8p09um3	6	06.05.1974	39.4028	0	164	60	3	0	968211	IU/ml	968211	5.98597		0	IU/ml	0	0	IU/ml	0	0	0	5.98597	1	0	1	0	IU/ml	TaqMan		0	97.8	U/l	97.8	34	2.87647	44.4	U/l	44.4	0.453988	12	U/l	12	57	U/l	57	5.45	KU/l	5.45	57.1
7NQYKX4PN	13	24.08.1976	37.1028	1	175	70	3	1			1800000	6.25527	1800000			0																		45
7nxllchv9	6	25.05.1964	49.35	0	165	76	3	0	3557935	IU/ml	3557935	6.5512		< 15	IU/ml	0							1					TaqMan		0	70.8	U/l	70.8	34	2.08235	82.8	U/l	82.8	1.16949	42.6	U/l	42.6	50	U/l	50	4.89	KU/l	4.89	57.3
7pjas6efm	42	21.12.1951	61.7778	1	170	80	3	0	4,5*10^6	IU/ml	4500000	6.65321	25500	<25	IU/ml	14	<25	IU/ml	0	0	0	6.65321	1	0	1	neg	IU/ml	TaqMan		<25	105	U/l	105	45	2.33333	167	U/l	167	1.59048	49	U/l	49	51	U/l	51	76.87	KU/l		4.4
7tgrw1j29	6	01.05.1964	49.4167	1	192	107	3	0	3682044	IU/ml	3682044	6.56609		0	IU/ml	0	0	IU/ml	0	0	0	6.56609	1	0	1	0	IU/ml	TaqMan		0	117	U/l	117	45	2.6	63.6	U/l	63.6	0.54359	151	U/l	151	53	U/l	53	5.98	KU/l	5.98	55.5
7tr87ge57	85	01.12.1974	38.8333	1	178	79.7	3	0	1100000	IU/ml	1100000	6.04139		<10	IU/ml		< 10	IU/ml	10	1		7.04139	1	< 10	1	< 10	IU/ml	TaqMan		10 IU/ml	98	U/l	98	45	2.17778	55	U/l	55	0.561224	52	U/l	52	39	U/l	39				60.8
7u568jpws	6	01.10.1976	37	0	158	57	3	0	725515	IU/ml	725515	5.86065		0	IU/ml	0	0	IU/ml	0	0	0	5.86065	1	0	1	0	IU/ml	TaqMan		0	180	U/l	180	34	5.29412	125	U/l	125	0.694444	145	U/l	145	78	U/l	78	7.05	KU/l	7.05
7utp78trq	85	03.01.1958	55.7444	0	159	103	2	0	1700000	IU/ml	1700000	6.23045		<10	IU/ml		< 10	IU/ml	10	1		7.23045	1	< 10	1	< 10	IU/ml	TaqMan		10 IU/ml	64	U/l	64	34	1.88235	46	U/l	46	0.71875	28	U/l	28	70	U/l	70				59.6
7vwhujq1e	23	24.04.1984	29.4361	0	170	55	3	0	766000	IU/ml	766000	5.88423	327000	nd	IU/ml	14	< 5	IU/ml	5	0.69897		6.5832	1	< 5	1			Sonstiges	QNT Heptimax	5 IU/ml	35	U/l	35	34	1.02941	28	U/l	28	0.8	11	U/l	11
7wvw7tkr5	85	24.10.1986	26.9361	0	172	95	2	0		IU/ml				<10	IU/ml		<10	IU/ml	0	0	0		1					TaqMan		10				34						30	U/l	30	62	U/l	62				59.5
7wyvggyn4	25	08.03.1939	74.5639	0	168	75	2	0	615	IU/ml	615	2.78888																			47	U/l	47	34	1.38235	40	U/l	40	0.851064	28	U/l	28	72	U/l	72	7.9	KU/l	7.9	57.7
7xj7yu81y	44	11.01.1967	46.7222	1		102	3	1	217844	IU/ml	217844	5.33815	265000	neg	IU/ml	14	neg	IU/ml	0	0	0	5.33815	1	0	1	nrg	IU/ml	TaqMan		<15 KIU/l	46.5	U/l	46.5	45	1.03333	69.6	U/l	69.6	1.49677	38.1	U/l	38.1	70.3	U/l	70.3				34.8
7y8drfa8a	23	03.08.1970	43.1611	1	178	80	3	0	485500	IU/ml	485500	5.68619		< 615	IU/ml		< 615	IU/ml	615	2.78888		8.47506	1	< 615	1						131	U/l	131	45	2.91111	175	U/l	175	1.33588	198	U/l	198
80KRXP7R7	44	18.07.1966	47.2028	0	173	76	3	0	941611	IU/ml	941611	5.97387	11600000	<15	IU/ml	14	neg	IU/ml	0	0	0	5.97387	1	0	1			TaqMan		<25 KIU/l	67.7	U/l	67.7	34	1.99118	84.7	U/l	84.7	1.25111	73.3	U/l	73.3	104	U/l	104				36.6
80utrlgpx	23	06.10.1975	37.9861	1	175	92	3	0	363000	IU/ml	363000	5.55991	103000	< 615	IU/ml		< 615	IU/ml	615	2.78888		8.34878	1	< 615	1			Sonstiges	Siemens Branched DNA		31	U/l	31	45	0.688889	19	U/l	19	0.612903	57
82cjfqk39	25	23.12.1968	44.7722	0	173	57	3	0	76427	IU/ml	76427	4.88325		0	IU/ml		0	IU/ml	0	0		4.88325	1	0	1	0	IU/ml	Abbott Real Time PCR	Real Time Abbott	< 12	91	U/l	91	34	2.67647	84	U/l	84	0.923077	70	U/l	70	73	U/l	73				54
82m7m4tfq	85	29.04.1967	46.4222	1	181	70	3	0	330000	IU/ml	330000	5.51851		<10	IU/ml		<10	IU/ml	10	1		6.51851	1	< 10	1	< 10	IU/ml	TaqMan		10 IU/ml				45						195	U/l	195	103	U/l	103				59.6
82S3VDR39	7	27.01.1972	41.6778	0	169	96	3	0	6830000	IU/ml	6830000	6.83442	7100000	<25	IU/ml	14	neg.	IU/ml	0	0	0	6.83442	1	0	1			TaqMan		<25 IU/ml	131	U/l	131	34	3.85294					19	U/l	19	51	U/l	51	11.486	KU/l	11.486
845AGKG04	47	27904	37.3528	1	180	75	3	0			238000	5.37658	238000			0								0	1			TaqMan		20			112	45	2.48889			53	0.473214			54			62			12.3
84mhs4muh	22	13.03.1976	37.55	1	178	70	3	0	11400000	IU/ml	11400000	7.0569		neg.	IU/ml		neg.	IU/ml	0	0		7.0569	1	10400	0			TaqMan		0,01 KiU/ml	99	U/l	99	45	2.2	66	U/l	66	0.666667	48	U/l	48	57	U/l	57	12.5	KU/l	12.5	56.3
84YGM6EAA	12							0											0	0	0
873h2hxru	5	31.03.1968	45.5028	1	171	87	3	0	266500	IU/ml	266500	5.4257	28699	<15	IU/ml	14	n.d.	IU/ml	0	0	0	5.4257	1	<15	1	< 15	IU/ml	TaqMan		15 IU/ml	56	U/l	56	45	1.24444	31	U/l	31	0.553571	45	U/l	45	57	U/l	57				39.7
88p9727cf	22	13.01.1976	37.7167	1	171	67	3	0	3370000	IU/ml	3370000	6.52763		neg.	IU/ml		neg.	IU/ml	0	0		6.52763	1	0	1	neg.	IU/ml	TaqMan		ca. 0,01 KIU/ml	231	U/l	231	45	5.13333	65	U/l	65	0.281385	55	U/l	55	59	U/l	59	8	KU/l	8	62.3
88ym7q98l	7	02.06.1956	57.3306	1	188	95	2	0	67500	IU/ml	67500	4.8293	17000000	<25	IU/ml	0	0	IU/ml	0	0	0	4.8293	1	0	1	0	IU/ml	TaqMan		<25	38	U/l	38	45	0.844444				0	100	U/l	100	64	U/l	64	8.77	KU/l	8.77	3.25
8AJRC7E3N	42	15.07.1965	48.2111	1	170	80	3	0	2600000	IU/ml	2600000	6.41497	840000	0	IU/ml				15	1.17609	15	7.59106									72	U/l	72	45	1.6	47	U/l	47	0.652778	97	U/l	97	89	U/l	89	7083	KU/l	7.083	4.6
8AS28EC2X	42	24.02.1980	33.6028	0	167	57	3	0	27000000	IU/ml	27000000	7.43136	210000	<25	IU/ml	0	neg	IU/ml	0	0	0	7.43136	1	<25	1	neg	IU/ml	TaqMan		<25 IU/ml	102	U/l	102	34	3	68	U/l	68	0.666667	14.6	U/l	14.6	44	U/l	44	6.904	KU/l	6.904	4.2
8d9d3dpa7	7	07.07.1934	79.2333	1	168	75	2	0	35300	IU/ml	35300	4.54777	56500	0	IU/ml	0	0	IU/ml	0	0	0	4.54777	1	0	1			TaqMan		<15	68	U/l	68	45	1.51111				0	25	U/l	25	56	U/l	56				4.18
8DDEJSQLF	39	04.12.1971	41.825	0	168	78	3	0	45200	IU/ml	45200	4.65514	44300	neg	IU/ml	0	neg	IU/ml	0	0	0	4.65514	1	<12	1	<12	IU/ml	Abbott Real Time PCR	Real Time Abott	<12	41	U/l	41	34	1.20588	39	U/l	39	0.95122	36	U/l	36	90	U/l	90
8DQXJRJCH	7	15.02.1963	50.6278	1	171	85	2	0	2450000	IU/ml	2450000	6.38917	1100000	132	IU/ml	140	neg	IU/ml	0	0	0	6.38917	1	0	1	0	IU/ml	TaqMan		25 IU/ml	67	U/l	67	45	1.48889				0	25	U/l	25	61	U/l	61	8.818	KU/l	8.818
8ggpv82at	7	09.06.1956	57.3111	1	183	94	3	0	2450000	IU/ml	2450000	6.38917	2870000	221	IU/ml	175	0	IU/ml	0	0	15	6.38917	1	<25	1	4830000	IU/ml	TaqMan		<25IU/ml	199	U/l	199	45	4.42222				0	183	U/l	183	103	U/l	103	5.547	KU/l	5.547
8gn5jrc5g	35	05.06.1981	32.3222	1	176	75	3	0	22900	IU/ml	22900	4.35984	285000	neg.	IU/ml	0	neg.	IU/ml	0	0	0	4.35984	1	0	1	neg.	IU/ml	Amplicor		50 IU/ml	48	U/l	48	45	1.06667	39	U/l	39	0.8125	69	U/l	69	83	U/l	83				4.96
8GYM7VJAC	39	27.07.1967	46.1778	1	161	60	3	0	11000000	IU/ml	11000000	7.04139	6780000	<10	IU/ml	0	neg	IU/ml	0	0	0	7.04139	1	<12	1			Abbott Real Time PCR	Real Time Abbott	<12	361	U/l	361	45	8.02222	326	U/l	326	0.903047	263	U/l	263	67	U/l	67
8J56RKQC5	13	18.07.1969	44.2028	1	180	100	3	0	7230000	IU/ml	7230000	6.85914	2990000	<25	IU/ml	14	neg	IU/ml	0	0	0	6.85914	1	0	1	neg	IU/ml	TaqMan		15 IU/ml	29	U/l	29	45	0.644444	27	U/l	27	0.931034	34	U/l	34	58	U/l	58
8JH4RUA5J	12							0			690000	5.83885	690000
8m1lpn471	35	19.09.1977	36.0333	1	178	84	3	0	3200000	IU/ml	3200000	6.50515		neg.	IU/ml	0	neg.	IU/ml	0	0	0	6.50515	1	0	1	2990000	IU/ml	Amplicor		50 IU/ml	168	U/l	168	45	3.73333	83	U/l	83	0.494048	89	U/l	89	78	U/l	78				4.95
8maf0rwcl	39	11.01.1991	22.7222	1	174	65	3	0	695000	IU/ml	695000	5.84198		< 12	IU/ml		neg.	IU/ml	0	0	0	5.84198	1	0	1			Abbott Real Time PCR	Real Time Abbott	< 12	86	U/l	86	45	1.91111	29	U/l	29	0.337209	31	U/l	31	112	U/l	112
8manfty42	25	06.06.1969	44.3194	1	170	57	3	0	1770909	IU/ml	1770909	6.2482																			143	U/l	143	45	3.17778	119	U/l	119	0.832168	396	U/l	396				6.9	KU/l	6.9
8n6aa2j3l	35	10.01.1990	23.725	0	163	57	3	0	11100	IU/ml	11100	4.04532	4140	neg.	IU/ml	0	neg.	IU/ml	0	0	0	4.04532	1	0	1	neg.	IU/ml	Amplicor		50 IU/ml	64	U/l	64	34	1.88235	46	U/l	46	0.71875	11	U/l	11	59	U/l	59				4.77
8p5cmytgt	35	27.06.1976	37.2611	1	172	79	3	0	680000	IU/ml	680000	5.83251	32600	neg.	IU/ml	0	neg.	IU/ml	0	0	0	5.83251	1	0	1	neg.	IU/ml	Amplicor		50 IU/ml	41	U/l	41	45	0.911111	53	U/l	53	1.29268	47	U/l	47	110	U/l	110				5.07
8pss6ma8n	6	07.01.1963	50.7333	0		60	2	0	5091405	IU/ml	5091405	6.70684		< 15	IU/ml	0	0	IU/ml	0	0	0	6.70684	1	0	1	0	IU/ml	TaqMan		0	76.8	U/l	76.8	34	2.25882	72	U/l	72	0.9375	13.2	U/l	13.2	46	U/l	46	5.84	KU/l	5.84	57.8
8QJUE9UVW	66	31.12.1984	28.7528	1	180	70	3	0	910	IU/ml	910	2.95904	10700000	< 23	IU/ml	0	<23	IU/ml	23	1.36173		4.32077	1								95	U/l	95	45	2.11111	60	U/l	60	0.631579	16	U/l	16	60	U/l	60				43
8r7ucxk10	35	20.03.1982	31.5306	1	173	93	3	0	2090000	IU/ml	2090000	6.32015	1650000	nd	IU/ml	0	neg.	IU/ml	0	0	0	6.32015	1	0	1	neg.	IU/ml	Amplicor		50 IU/ml	284	U/l	284	45	6.31111	116	U/l	116	0.408451	58	U/l	58	49	U/l	49				4.96
8SGPHFL0A	66	25.08.1972	41.1	0	168	62	3	0	3800000	IU/ml	3800000	6.57978	455000	<100	IU/ml	0	<23	IU/ml	23	1.36173		7.94151	1	<23	1	<23	IU/ml				33	U/l	33	34	0.970588	25	U/l	25	0.757576	22	U/l	22
8ta4a9x6j	57	30.12.1966	46.7528	1	200	140	3	0	130000	IU/ml	130000	5.11394	104	45	IU/ml		neg.	IU/ml	0	0	0	5.11394	1	0	1	neg.	IU/ml	TaqMan		< 15	56.4	U/l	56.4	45	1.25333	43.5	U/l	43.5	0.771277	121	U/l	121	63.3	U/l	63.3
8UNASDFVH	66	26.04.1983	30.4306	0	175	93.8	3	0	270000	IU/ml	270000	5.43136	16500	<23	IU/ml	0	0.023	IU/ml	0	0	0	5.43136	1	<23	1	<23	IU/ml				81	U/l	81	34	2.38235	48	U/l	48	0.592593	17	U/l	17							38
8uwut0rv1	57	16.01.1962	51.7083	1	182	72	3	0	92000	IU/ml	92000	4.96379	53000	neg.	IU/ml	0	neg.	IU/ml	0	0	0	4.96379	1	0	1	neg.	IU/ml	TaqMan		< 15	53.7	U/l	53.7	45	1.19333	23.4	U/l	23.4	0.435754	33.4	U/l	33.4	38	U/l	38	8.49	KU/l	8.49
8wf4at3f6	66	24.11.1962	50.8528	0	169	61.4	3	0	121000	IU/ml	121000	5.08279	16300	<23	IU/ml	14	<23	IU/ml	0	0	0	5.08279	1	<23	1	<23	IU/ml				39	U/l	39	34	1.14706	25	U/l	25	0.641026	13	U/l	13							37
8wrpn2hqn	57	07.01.1965	48.7333	0	161	60	3	0	400000	IU/ml	400000	5.60206		pos.	IU/ml	14	neg.	IU/ml	0	0	0	5.60206	1			neg.	IU/ml	TaqMan		< 15	31.1	U/l	31.1	34	0.914706	24.9	U/l	24.9	0.800643	34.7	U/l	34.7
8xtdwlvj6	66	06.08.1981	32.1528	0	174	68	3	0	500	IU/ml	500	2.69897	0	<23	IU/ml		<23	IU/ml	0	0	0	2.69897	1	<23	1	<23	IU/ml				87	U/l	87	34	2.55882	33	U/l	33	0.37931	22	U/l	22							38
8yfnc2a1u	57	11.07.1980	33.2222	0	157	45	3	0	2700	IU/ml	2700	3.43136	139										0								31.2	U/l	31.2	34	0.917647	29.3	U/l	29.3	0.939103	15.5	U/l	15.5	57	U/l	57
8YS23NC8R	30							0			6000000	6.77815	6000000						0	0	0	6.77815
8ys94uh45	66	07.10.1967	45.9833	1	178	73	3	0		IU/ml				< 0,023	IU/ml	0		IU/ml	23	1.36173	23	0	1	< 0,023	1	< 23	IU/ml	Sonstiges		< 0,023 IU/ml	114	U/l	114	45	2.53333	47	U/l	47	0.412281	22	U/l	22							42
8yys7ldu9	57	15.11.1961	51.8778	0	174	79	3	0	490000	IU/ml	490000	5.6902	42800	neg.	IU/ml	0	neg.	IU/ml	0	0	0	5.6902	1	0	1	neg.	IU/ml	TaqMan		<15 IU/ml	70.5	U/l	70.5	34	2.07353	40.5	U/l	40.5	0.574468	21.1	U/l	21.1	59.4	U/l	59.4
902vhgudu	85	15.01.1951	62.7111	0	166	71	3	0	110000	IU/ml	110000	5.04139				194	<10	IU/ml	0	0	0	5.04139	1	<10	1	<10	IU/ml	TaqMan		10	54	U/l	54	34	1.58824	39	U/l	39	0.722222	27	U/l	27	86	U/l	86				63.1
92Q4CYRYQ	6	09.08.1957	56.1444	1	176	70	3	1	6015	IU/ml	6015	3.77924		0	IU/ml	0	0	IU/ml	0	0	0	3.77924	0			441	IU/ml	TaqMan		0	159	U/l	159	45	3.53333	162	U/l	162	1.01887	341	U/l	341							47.6
93c6hfsyu	66	12.12.1979	33.8028	1	185	88	3	0	3000000	IU/ml	3000000	6.47712		< 0,023	IU/ml		< 0,023	IU/ml	0	0	0	6.47712	0					Sonstiges		< 0,023 IU/ml	105	U/l	105	45	2.33333	47	U/l	47	0.447619	23	U/l	23							48
93qp1xam6	35	04.02.1981	32.6583	0	164	62	3	0	357000	IU/ml	357000	5.55267		neg.	IU/ml	0	neg.	IU/ml	0	0	0	5.55267	1	0	1	neg.	IU/ml	Amplicor		50 IU/ml	54	U/l	54	34	1.58824	33	U/l	33	0.611111	15	U/l	15	57	U/l	57	6.4	KU/l	6.4	4.59
94302ngdp	25	04.11.1979	33.9083	1	175	70	3	0	175634	IU/ml	175634	5.24461		12	IU/ml		0	IU/ml	0	0		5.24461	1	0	1	0	IU/ml	Abbott Real Time PCR	Abbott Real Time PCR	neg. <12	41	U/l	41	45	0.911111	40	U/l	40	0.97561	49	U/l	49	61	U/l	61	8.7	KU/l	8.7	61.1
9442spsjd	66	18.06.1961	52.2861	1	180	70	2	0	1620000	IU/ml	1620000	6.20952		< 0,023	IU/ml		< 0,23	IU/ml	0	0		6.20952	1	< 0,023	1	< 23	IU/ml	Sonstiges		< 0,023	104	U/l	104	45	2.31111	49	U/l	49	0.471154	82	U/l	82	86	U/l	86	72			42
94csa0qep	35	19.02.1960	53.6167	1	175	63	3	0	97100	IU/ml	97100	4.98722	63100	neg.	IU/ml	0	neg.	IU/ml	0	0	0	4.98722	1	0	1	neg.	IU/ml	Amplicor		50 IU/ml	256	U/l	256	45	5.68889	103	U/l	103	0.402344	101	U/l	101	93	U/l	93	8.3	KU/l	8.3	4.68
955hxwkpc	66	30.01.1973	40.6694	0	162	52	3	0																										34
95ry0es4r	25	17.12.1951	61.7889	1	174	74	3	1	41500	Kopien/ml	15961.5	4.20307		40	IU/ml		0	IU/ml	0	0		4.20307	1	0	1			Sonstiges	PCR	12	56	U/l	56	45	1.24444	129	U/l	129	2.30357	42	U/l	42	61	U/l	61				48.8
95shywkpc	66	30.01.1973	40.6694	0	162	52	3	0	220000	IU/ml	220000	5.34242		< 0,023	IU/ml		< 0,023	IU/ml	0	0		5.34242	1	< 0,023	1			Sonstiges		< 0,023	97	U/l	97	34	2.85294	75	U/l	75	0.773196	66	U/l	66	76						42
971wpakj5	35	03.02.1972	41.6611	1	178	80	3	0	6200	IU/ml	6200	3.79239	65400	neg.	IU/ml	0	neg.	IU/ml	0	0	0	3.79239	1	0	1	neg.	IU/ml	Amplicor		50 IU/ml	77	U/l	77	45	1.71111	37	U/l	37	0.480519	35	U/l	35	42	U/l	42	10.1	KU/l	10.1	4.8
988r9h0qd	13	16.02.1961	52.625	0	167	62	3	0	22700	IU/ml	22700	4.35603	79700	neg.	IU/ml	0	neg.	IU/ml	0	0	0	4.35603	1	0	1	neg.	IU/ml	TaqMan		15 IU/ml	90	U/l	90	34	2.64706	62	U/l	62	0.688889	11	U/l	11	108	U/l	108	7483	U/l	7.483
995d64q1h	55	06.10.1975	37.9861	1	181	74	3	0	136000	IU/ml	136000	5.13354		< 25	IU/ml		n.nachw.	IU/ml	0	0	0	5.13354	1	0	1	neg	IU/ml	TaqMan		25	25	U/l	25	45	0.555556	45	U/l	45	1.8	36	U/l	36	81	U/l	81	10.6	KU/l	10.6	58.9
99tea3p5u	25	10.12.1976	36.8083	1	185	105	3	0	528734	IU/ml	528734	5.72324		31	IU/ml		0	IU/ml	0	0		5.72324	1	0	1						115	U/l	115	45	2.55556	276	U/l	276	2.4	1357	U/l	1357	104	U/l	104	12.9	KU/l	12.9
9cfq2x0dq	35	16.05.1971	42.375	1	170	65	3	0	2870000	IU/ml	2870000	6.45788	2030000	neg.	IU/ml	0	neg.	IU/ml	0	0	0	6.45788	1	0	1	neg.	IU/ml	Amplicor		50 IU/ml	80	U/l	80	45	1.77778	40	U/l	40	0.5	27	U/l	27	74	U/l	74	6.2	KU/l	6.2	4.63
9d06dkrpg	13	16.07.1975	38.2083	1	185	102	3	0	327000	IU/ml	327000	5.51455	53400	125000	IU/ml	11000							1					TaqMan		15 IU/ml	264	U/l	264	45	5.86667	128	U/l	128	0.484848	302	U/l	302	105	U/l	105	9885	U/l	9.885	43
9d6dfcruu	25	19.10.1979	33.95	1	189	82.7	2	0	420128	IU/ml	420128	5.62338		0	IU/ml		0	IU/ml	0	0		5.62338									61	U/l	61	45	1.35556	49	U/l	49	0.803279	26	U/l	26	43	U/l	43	7.3	KU/l	7.3
9eg8tkxk4	35	18.01.1969	44.7028	1	155	62	3	0	537000	IU/ml	537000	5.72997		neg.	IU/ml	0	neg.	IU/ml	0	0	0	5.72997	1	0	1	neg.	IU/ml	Amplicor		50 IU/ml	158	U/l	158	45	3.51111	108	U/l	108	0.683544	138	U/l	138	98	U/l	98				5.07
9egulxva5	13	08.02.1967	46.6472	1	176	70	3	0	8060000	IU/ml	8060000	6.90634	2320000				neg.	IU/ml	0	0	0	6.90634	1	0	1	neg.	IU/ml	TaqMan		15 IU/ml	109	U/l	109	45	2.42222	64	U/l	64	0.587156	74	U/l	74	69	U/l	69				42.3
9eljyayju	25	08.08.1971	42.1472	1	179	69	3	0	4733015	IU/ml	4733015	6.67514		40	IU/ml		0	IU/ml	0	0		6.67514	1					Abbott Real Time PCR	Abbott Realtime	12 IU/ml	235	U/l	235	45	5.22222	177	U/l	177	0.753191	137	U/l	137	76	U/l	76
9epgjw5md	11	28.07.1970	43.175	1	186	84	3	0		IU/ml																		TaqMan		15 IU/ml	159	U/l	159	45	3.53333	143	U/l	143	0.899371	34	U/l	34	97	U/l	97
9ETHW6MD4	85	20.10.1960	52.9472	0	158	48	3	1	29000	IU/ml	29000	4.4624		<10	IU/ml	14	<10	IU/ml	0	0	0	4.4624	1	<10	1	<10	IU/ml	TaqMan		10 IU/ml	129	U/l	129	34	3.79412	84	U/l	84	0.651163	38	U/l	38	117	U/l	117				56.3
9f7ur2kvk	33	04.06.1979	34.325	1	170	74	3	0	181000	IU/ml	181000	5.25768		<10	IU/ml		< 10	IU/ml	10	1		6.25768	1	< 10	1			TaqMan		<10 U/L	111	U/l	111	45	2.46667	47	U/l	47	0.423423	73	U/l	73	92	U/l	92	6.62	KU/l	6.62	61.7
9FP1JFEC0	13	03.05.1962	51.4111	1	176	100	3	0	12500000	IU/ml	12500000	7.09691	2400000	<25	IU/ml	20	neg	IU/ml	0	0	0	7.09691	1	0	1			TaqMan		< 15 IU/ml	114	U/l	114	45	2.53333	68	U/l	68	0.596491	43	U/l	43	68	U/l	68				42.8
9G6GD22SU	35	09.12.1974	38.8111	1	175	60	3	0	638000	IU/ml	638000	5.80482	54100	neg	IU/ml	0	neg.	IU/ml	0	0	0	5.80482	1	0	1	neg	IU/ml	Amplicor		50 IU/ml	88	U/l	88	45	1.95556	44	U/l	44	0.5	21	U/l	21	84	U/l	84				48.1
9gecwyl48	13	08.02.1972	41.6472	1	201	111	3	0	290000	IU/ml	290000	5.4624	142000	< 25	IU/ml	14							0					TaqMan		15 IU/ml	137	U/l	137	45	3.04444	86	U/l	86	0.627737	36	U/l	36	80	U/l	80				50.7
9gy8mnnyh	25	21.01.1967	46.6944	1	180	70.6	3	0	4902491	IU/ml	4902491	6.69042		0	IU/ml		0	IU/ml	0	0		6.69042									37	U/l	37	45	0.822222	50	U/l	50	1.35135	19	U/l	19	71	U/l	71				57
9HKUJDPD9	35	18.01.1961	52.7028	0	185	68	3	0	341000	IU/ml	341000	5.53275	7650000			445	neg	IU/ml	0	0	0	5.53275	1	0	1	neg	IU/ml	Amplicor		50 IU/ml	30	U/l	30	34	0.882353	35	U/l	35	1.16667	22	U/l	22	49	U/l	49	8.5	KU/l	8.5	43
9HTW7JHR2	16							0			381000	5.58092	381000						0	0	0	5.58092
9JCHQXU49	35							0			3000	3.47712	3000			0			0	0	0	3.47712
9jldqymy1	13	14.03.1968	45.5472	0	158	51.8	3	0	131000	IU/ml	131000	5.11727	90100	neg.	IU/ml		neg.	IU/ml	0	0		5.11727	1	0	1	neg.	IU/ml	TaqMan		15 IU/ml	82	U/l	82	34	2.41176	52	U/l	52	0.634146	32	U/l	32	54	U/l	54				52.4
9JUV8V657	35	01.06.1961	52.3333	1	166	70	3	0	441000	IU/ml	441000	5.64444	831000	neg	IU/ml	0	neg	IU/ml	0	0	0	5.64444	1	0	1	neg	IU/ml	Amplicor		50 IU/ml	45	U/l	45	45	1	34	U/l	34	0.755556	26	U/l	26	58	U/l	58				34
9jy7cqkmd	25			1	178	84	3	0	3506808	IU/ml	3506808	6.54491		64	IU/ml	14	0	IU/ml	0	0		6.54491									98	U/l	98	45	2.17778	68	U/l	68	0.693878	41	U/l	41	77	U/l	77				60.2
9ldl5nepm	33	18.01.1980	33.7028	1	170	80.5	3	0	95100	IU/ml	95100	4.97818		neg. <10	IU/ml		neg. <10	IU/ml	10	1		5.97818	1	0	1			TaqMan		<10 U/l	35	U/l	35	45	0.777778	27	U/l	27	0.771429	27	U/l	27							60.9
9n01yrjtv	25	10.05.1965	48.3917	0	175	84	3	0	5050	IU/ml	5050	3.70329		80	IU/ml																63	U/l	63	34	1.85294	65	U/l	65	1.03175	19	U/l	19	59	U/l	59	11.1	KU/l	11.1	58
9NF0174EA	42	14.10.1984	28.9639	1	169	79.7	2	0	4200000	IU/ml	4200000	6.62325	1800000			0			0	0	0	6.62325	1	0	1	neg		TaqMan		25 IU/ml	73	U/l	73	45	1.62222	27	U/l	27	0.369863	32	U/l	32	61	U/l	61	7.154	KU/l	7.154	4.5
9nrwqjg6k	13	02.03.1966	47.5806	1	182	113	2	0	2680000	IU/ml	2680000	6.42813	10000000										0					TaqMan		15 IU/ml	121	U/l	121	45	2.68889	47	U/l	47	0.38843	131	U/l	131	155	U/l	155				50.2
9P12NM5V8	21	25.09.1956	57.0167	1	186	74	3	0	502765	IU/ml	502765	5.70137	1700000	3300	IU/ml	7600	67	IU/ml	67	1.82607	180	7.52744	1	<12	1			Abbott Real Time PCR	Real Time Abbott	<12	42	U/l	42	45	0.933333	35	U/l	35	0.833333	127	U/l	127	88	U/l	88	10622	KU/l	10.622	50.3
9ph0dhv92	25	09.09.1948	65.0611	1	181	90	2	0	3125309	IU/ml	3125309	6.49489																			13	U/l	13	45	0.288889	19	U/l	19	1.46154	29	U/l	29	80	U/l	80	4.8	KU/l	4.8	57.2
9qfhwfd07	13	14.08.1964	49.1306	1	170	70	3	0	178000	IU/ml	178000	5.25042	18500	neg.	IU/ml		neg.	IU/ml	0	0	0	5.25042	1	0	1	neg.	IU/ml	TaqMan		15 IU/ml	31	U/l	31	45	0.688889	30	U/l	30	0.967742	87	U/l	87	115	U/l	115				45.4
9rewxnvnn	33	04.12.1980	32.825	1	184	68	3	0		IU/ml				neg. <10	IU/ml		neg. <10	IU/ml	10	1		0	1	< 10	1	< 10	IU/ml	TaqMan		> 10	160	U/l	160	45	3.55556	50	U/l	50	0.3125	51	U/l	51	83	U/l	83	7.85	KU/l	7.85
9S30TY89V	17	23.07.1962	51.1889	0	170	56	3	0	4367061	IU/ml	4367061	6.64019	6400000	70	IU/ml	970	neg	IU/ml	0	0	0	6.64019		0	1						68	U/l	68	34	2	71	U/l	71	1.04412	69	U/l	69	72	U/l	72				4.11
9sdntx9tx	35	23.10.1981	31.9389	0	162	40	3	0	31900	IU/ml	31900	4.50379		neg.	IU/ml	0	neg.	IU/ml	0	0		4.50379	1	0	1	neg.	IU/ml	Amplicor		50 IU/ml	217	U/l	217	34	6.38235	140	U/l	140	0.645161	19	U/l	19	31	U/l	31	4.7	KU/l	4.7	4.43
9T4K0FAEC	35	07.01.1970	43.7333	1	182	100	3	0	4770000	IU/ml	4770000	6.67852	978000	neg.	IU/ml	0	neg.	IU/ml	0	0	0	6.67852	1	0	1	neg	IU/ml	Amplicor		50 IU/ml	180	U/l	180	45	4	85	U/l	85	0.472222	64	U/l	64	75	U/l	75	10.9	KU/l	10.9	4.63
9ucx3svp8	55	05.06.1976	37.3222	0	175	64	3	0	10200000	IU/ml	10200000	7.0086		neg.	IU/ml		neg	IU/ml	0	0		7.0086									208	U/l	208	34	6.11765	115	U/l	115	0.552885	72	U/l	72	73	U/l	73	9.7	KU/l	9.7	57.2
9VJA6X392	35	26.12.1967	45.7639	1	172	86	3	0	8070000	IU/ml	8070000	6.90687	1420000	neg.	IU/ml	0	neg	IU/ml	0	0	0	6.90687	1	0	1	neg	IU/ml	Amplicor		50 IU/ml	192	U/l	192	45	4.26667	82	U/l	82	0.427083	42	U/l	42	43	U/l	43				69.7
9ymdjl4mm	35	18.08.1972	41.1194	1	164	65	3	0	3870000	IU/ml	3870000	6.58771	1650000	nd									0					TaqMan		0,015 KIU/ml	106	U/l	106	45	2.35556	54	U/l	54	0.509434	73	U/l	73	53	U/l	53	8.4	KU/l	8.4	43.6
a0vsl26mv	2	20.11.1980	32.8639	1	187	85	3	0	2320000	IU/ml	2320000	6.36549		<25	IU/ml	14	neg	IU/ml	0	0	0	6.36549	1	0	1			TaqMan		<10 IU/ml	0.96	µkat/l	57.5885	45	1.27974	1.12	µkat/l	67.1866	1.16667	0.47	µkat/l	28.1944	1.67	µkat/l	100.18	174	µkat/l	10.4379	40.7
a2kc796f1	7	05.07.1982	31.2389	1	180	64	3	0	5790000	IU/ml	5790000	6.76268	3240000	0	IU/ml	14	0	IU/ml	0	0	0	6.76268	1	0	1	0	IU/ml	TaqMan		<25	206	U/l	206	45	4.57778	84	U/l	84	0.407767	78	U/l	78
A3S8ED4D1	35	30.08.1977	36.0861	1	172	85	3	0	2920000	IU/ml	2920000	6.46538	5010000	neg	IU/ml	0	neg	IU/ml	0	0	0	6.46538	1	0	1	neg	IU/ml	Amplicor		50 IU/ml	217	U/l	217	45	4.82222	73	U/l	73	0.336406	107	U/l	107	87	U/l	87	7992	KU/l	7.992	46
a43297k90	35	24.06.1972	41.2694	1	167	65	3	0	299000	IU/ml	299000	5.47567		100	IU/ml	16.3	neg.	IU/ml	0	0	0	5.47567	1	0	1	neg.	IU/ml	Amplicor		50 IU/ml	77	U/l	77	45	1.71111	36	U/l	36	0.467532	104	U/l	104	69	U/l	69				4.82
a5qendmym	35	06.03.1966	47.5694	1	172	71	3	0	248000	IU/ml	248000	5.39445	245000	neg.	IU/ml	0	neg.	IU/ml	0	0	0	5.39445	1	0	1	neg.	IU/ml	Amplicor		50 IU/ml	81	U/l	81	45	1.8	62	U/l	62	0.765432	42	U/l	42	75	U/l	75				5.15
a8mtwctrd	43			0	168	59.7	3	0	2342208	IU/ml	2342208	6.36963			IU/ml		neg.	IU/ml	0	0		6.36963	1	0	1	neg.	IU/ml	TaqMan		< 43 IU/ml	1.92	mmol/sl	115.2	34	3.38824	1.05	mmol/sl	63	0.546875	0.55	mmol/sl	33
a925x654a	42	15.04.1975	38.4611	1	175	89	3	0	11000000	IU/ml	11000000	7.04139	2590000	pos. < 25	IU/ml	14	n.d.	IU/ml	0	0	0	7.04139	1	0	1	<25	IU/ml	TaqMan		15	150	U/l	150	45	3.33333	93	U/l	93	0.62	25	U/l	25	57	U/l	57	7.623	KU/l	7.623	4.6
a92pejhwd	36	31.07.1977	36.1694	1	184	105	3	1	512000	IU/ml	512000	5.70927	503000				neg.	IU/ml	0	0		5.70927	1	0	1			Amplicor		0,02 KIU/ml	168	U/l	168	45	3.73333	99	U/l	99	0.589286	101	U/l	101	77	U/l	77
A9FAPPAVG	47	29944	31.7694	1	184	106	3	0			140000	5.14613	140000						0	0		5.14613				n.d.		TaqMan		20			47	45	1.04444			24	0.510638			60			79
aa8l9l6k7	43	29.03.1979	34.5056	0	170	78.6	3	0	11378	IU/ml	11378	4.05607		neg.	IU/ml		neg.	IU/ml	0	0		4.05607	1			neg.	IU/ml	TaqMan		< 43 IU/ml	0.84	mmol/sl	50.4	34	1.48235	0.54	mmol/sl	32.4	0.642857	0.93	mmol/sl	55.8
aajava158	42	02.11.1951	61.9139	0	183	70	3	0	370000	IU/ml	370000	5.5682		neg.	IU/ml		neg.	IU/ml	0	0		5.5682	1	0	1	neg.	IU/ml	Amplicor		ca. 50 IU/ml	87.6	IU/ml	87.6	34	2.57647	78.3	IU/ml	78.3	0.893836	32.6	IU/ml	32.6	65	IU/ml	65	10.349	KU/l	10.349	4.5
AALKQFUY8	55	19.09.1974	39.0333	1	172	65	3	0	3060000	IU/ml	3060000	6.48572											0								67	U/l	67	45	1.48889	61	U/l	61	0.910448	74	U/l	74	94	U/l	94	9.7	KU/l	9.7	60
adhhy9um1	42	17.06.1976	37.2889	1	182	86.5	3	0	54000	IU/ml	54000	4.73239		neg.	IU/ml								1	0	1	490000	IU/ml	Amplicor		ca. 50 IU/ml	85.6	IU/ml	85.6	45	1.90222	36.7	IU/ml	36.7	0.428738	27.9	IU/ml	27.9	49	IU/ml	49	8.232	IU/ml	8.232	4.9
AE8SLWD2V	6	04.02.1983	30.6583	0	165	70	3	0	1511434	IU/ml	1511434	6.17939		0	IU/ml	14							0								92.4	U/l	92.4	34	2.71765	64.8	U/l	64.8	0.701299	17.4	U/l	17.4	50	U/l	50	7.32	KU/l	7.32	55.8
AFX4NEW36	13	05.07.1973	40.2389	1	190	85	3	0			210000	5.32222	210000			0	neg		0	0	0	5.32222											50	45	1.11111			28	0.56			28			72
ah8eemw2a	42	02.02.1986	27.6639	1	170	67.5	3	0	30000	IU/ml	30000	4.47712		neg.	IU/ml								1	0	1			Amplicor		50 IU/ml	133.5	IU/ml	133.5	45	2.96667	75.9	IU/ml	75.9	0.568539							23.6	IU/ml	23.6	4.9
ajaava153	42	02.11.1951	61.9139	0	183	70	3	0	370000	IU/ml	370000	5.5682		neg.	IU/ml		neg.	IU/ml	0	0		5.5682	1	0	1	neg.	IU/ml	Amplicor		ca. 50 IU/ml	87.6	U/l	87.6	34	2.57647	78.3	U/l	78.3	0.893836	32.6	U/l	32.6	65	U/l	65	10.349	KU/l	10.349	4.5
al4asmc64	42	29.06.1967	46.2556	1	178	126.5	2	0	8000000	IU/ml	8000000	6.90309		pos. > 25	IU/ml								1	0	1	neg.	IU/ml	TaqMan		25 IU/ml	263.2	IU/ml	263.2	45	5.84889	87	IU/ml	87	0.330547	94.8	IU/ml	94.8	60	IU/ml	60	7.857	KU/l	7.857	4.8
amjlhu4c4	36	10.12.1973	39.8083	0	173	76	3	0	1050	IU/ml	1050	3.02119	2040000	20	IU/ml	0	nd						1	0	1	<0,02	IU/ml	TaqMan		0,02 KIU/ml	89	U/l	89	34	2.61765	41	U/l	41	0.460674	35	U/l	35	54	U/l	54
amm2k4gts	42	05.03.1981	32.5722	1	175	75	2	0	140000	IU/ml	140000	5.14613					neg.	IU/ml	0	0		5.14613	0					TaqMan		25 IU/ml	125	U/l	125	45	2.77778	80	U/l	80	0.64	52	U/l	52	64	U/l	64	10.322	KU/l	10.322	5.1
ap4mpd2s0	130	22.11.1978	34.8583	1	170	65	3	0	166270	IU/ml	166270	5.22081	12000	neg.	IU/ml	0	neg.	IU/ml	0	0	0	5.22081	0					TaqMan		< 43	91	U/l	91	45	2.02222	63	U/l	63	0.692308	76	U/l	76	86	U/l	86	7.412	KU/l	7.412	68.3
apsh2wlvm	42	29.01.1957	56.6722	1	176	83	3	0	1900000	IU/ml	1900000	6.27875		neg.	IU/ml								1	0	1	neg.	IU/ml				114	U/l	114	45	2.53333	68	U/l	68	0.596491	87	U/l	87	130	U/l	130	7.461	KU/l	7.461	4.3
AQ7YT1HXU	47							0			940000	5.97313	940000
ardw9u2p9	11	11.08.1957	56.1389	1	180	100	3	1	750342	IU/ml	750342	5.87526		reaktiv	IU/ml								0					TaqMan		< 15 IU/ml	34	U/l	34	45	0.755556	37	U/l	37	1.08824	96	U/l	96	88	U/l	88
arj5argl2	21	20.02.1942	71.6139	1	166	76.3	2	0		IU/ml				< 12	IU/ml		< 12	IU/ml	12	1.07918		0	1	< 12	1	< 12	IU/ml	Abbott Real Time PCR	Real Time Abbott	< 12 IU/ml	23	U/l	23	45	0.511111	25	U/l	25	1.08696	38	U/l	38	66	U/l	66	10420	U/l	10.42	56.2
avl0qmpr7	42	02.07.1971	42.2472	1	178	110.5	3	0	2100000	IU/ml	2100000	6.32222		pos. > 25	IU/ml								0								128.4	IU/ml	128.4	45	2.85333	71.2	IU/ml	71.2	0.554517	75.4	IU/ml	75.4	63	IU/ml	63	9.398	KU/l	9.398	4.4
AWDCYGP1V	47	20805	56.7917	0	156	53	3	1			685000	5.83569	685000						0	0		5.83569		0	1	0		TaqMan		20			362	34	10.6471			277	0.765193			150			95
awml0t1j2	67	10.10.1967	45.975	0	167	63	3	0	65350	IU/ml	65350	4.81525	2350000	nd			nd	IU/ml	0	0	0	4.81525	1	< 15	1	< 15	IU/ml	TaqMan		< 15	566	U/l	566	34	16.6471	378	U/l	378	0.667845	757	U/l	757	108	U/l	108	9.3	KU/l	9.3	63.9
ax9fpt4ej	33	01.09.1961	52.0833	0	158	65	3	0	5900000	IU/ml	5900000	6.77085		< 10	IU/ml																98	U/l	98	34	2.88235	55	U/l	55	0.561224	19	U/l	19	76	U/l	76	4.23	KU/l	4.23	56.6
axj8s57xt	42	12.10.1969	43.9694	1	165	80.5	3	0	720000	IU/ml	720000	5.85733		neg.	IU/ml								1	0	1	neg.	IU/ml	TaqMan		25	155	IU/ml	155	45	3.44444	126	IU/ml	126	0.812903	230	IU/ml	230	86	IU/ml	86	6.534	KU/l	6.534	4.1
ayxgnjklt	32	15.03.2008	5.54444	1	170	90	3	0	175000	IU/ml	175000	5.24304	60700	< 12	IU/ml	0	neg.	IU/ml	0	0	0	5.24304	1	0	1	neg.	IU/ml	Abbott Real Time PCR	Abbott Real Time PCR	< 12 IU/ml	237	U/l	237	45	5.26667	76	U/l	76	0.320675	93	U/l	93	84	U/l	84	8.94	KU/l	8.94	50.1
c1g48a3ms	25	01.11.1967	45.9167	1	177	70	3	0	2104600	IU/ml	2104600	6.32317		< 12	IU/ml																125	U/l	125	45	2.77778	97	U/l	97	0.776	71	U/l	71	38	U/l	38				59.5
c2ux8n9xq	57	07.10.1971	41.9833	1	180	83	3	0	49000	IU/ml	49000	4.6902	391000																		104	U/l	104	45	2.31111	56	U/l	56	0.538462	58.3	U/l	58.3	73.1	U/l	73.1				4.59
c3d8mc1kf	32	27.03.1967	46.5111	1	174	82	3	0	1120000	IU/ml	1120000	6.04922		neg.	IU/ml	0	neg.	IU/ml	0	0	0	6.04922	1	0	1	neg.	IU/ml	Abbott Real Time PCR	Abbott Real Time PCR	< 12 IU/ml	159	U/l	159	45	3.53333	77	U/l	77	0.484277	66	U/l	66	48	U/l	48	142	mg/dl		45.9
c3s7w4eyt	6	16.08.1985	28.125	1	183	90	3	0	40928	IU/ml	40928	4.61202		0	IU/ml	0	0	IU/ml	0	0	0	4.61202	1	0	1	0	IU/ml	TaqMan		0	75	U/l	75	45	1.66667	50.4	U/l	50.4	0.672	262	U/l	262							54.8
C45RPTAX2	35							0			350000	5.54407	350000			0			0	0	0	5.54407
C4WJ9TY9Y	35	02.09.1982	31.0806	0	170	61	3	0	63000	IU/ml	63000	4.79934	550000			0		IU/ml	0	0	0	4.79934									88	U/l	88	34	2.58824	68	U/l	68	0.772727	112	U/l	112	78	U/l	78
C8LKMSHQK	14	24.06.1969	44.2694	1	176	88	3	0	nachgewiesen	IU/ml	15	1.17609	15																		100	U/l	100	45	2.22222	54	U/l	54	0.54	68	U/l	68	118	U/l	118	7.75	KU/l	7.75
camqw10v1	32	22.04.1952	61.4417	1	180	87	3	0	233000	IU/ml	233000	5.36736	32700	< 12	IU/ml	0	neg.	IU/ml	0	0		5.36736	1	0	1	neg.	IU/ml	Abbott Real Time PCR	Abbott Real Time PCR	< 12 IU/ml	133	U/l	133	45	2.95556	41	U/l	41	0.308271	75	U/l	75	36	U/l	36				44.8
cc46tqg82	17	21.02.1962	51.6111	1	180	62	3	0	2300000	IU/ml	2300000	6.36173	8490000	20	IU/ml	14	neg	IU/ml	0	0	0	6.36173	1	0	1			Abbott Real Time PCR	PCR Abott Real time	12-50	52	U/l	52	45	1.15556	57	U/l	57	1.09615	22	U/l	22	78	U/l	78				68.4
ccggefnff	32	07.07.1959	54.2333	1	178	75	3	0	20100	IU/ml	20100	4.3032	64899	neg.	IU/ml	0	neg.	IU/ml	0	0	0	4.3032	1	0	1	neg.	IU/ml	Abbott Real Time PCR	Abbott Real Time PCR	< 12 IU/ml	33	U/l	33	45	0.733333	20	U/l	20	0.606061	23	U/l	23	102	U/l	102	8.53	KU/l	8.53	51.8
cegq48vl9	32	19.03.1982	31.5333	1	178	72	3	0	230000	IU/ml	230000	5.36173		< 12	IU/ml	0	neg.	IU/ml	0	0		5.36173	1	0	1	neg.	IU/ml	Abbott Real Time PCR	Abbott Real Time PCR	< 12 IU/ml	143	U/l	143	45	3.17778	41	U/l	41	0.286713	54	U/l	54	101	U/l	101
cgq06qmtj	138	02.10.1954	58.9972	1	180	83.1	2	0		IU/ml	4380000	6.64147	4380000	<15	IU/ml	43.7	< 15	IU/ml	0	0	0	6.64147	1	< 15	1	1010000	IU/ml	TaqMan	Roche Ampli Prep	< 15	108	U/l	108	45	2.4	31	U/l	31	0.287037	53	U/l	53	97	U/l	97				64.1
cjkmwqvkd	25	10.04.1962	51.475	1	180	79	3	0	1483079	IU/ml	1483079	6.17116																			83	U/l	83	45	1.84444	92	U/l	92	1.10843	33	U/l	33	77	U/l	77	8	KU/l	8
cpnjtvgwe	22	02.04.1980	33.4972	1	182	69	3	0	6810000	IU/ml	6810000	6.83315	473	<15	IU/ml	14	neg	IU/ml	0	0	0	6.83315	1	0	1	neg	IU/ml	TaqMan		0,01 KIU/ml	62	U/l	62	45	1.37778	43	U/l	43	0.693548	23	U/l	23	56	U/l	56	10	KU/l	10	60.3
cvw2unses	4	12.07.1975	38.2194	1	178	91	3	0	740000	IU/ml	740000	5.86923	7210000	neg.	IU/ml	0	neg.	IU/ml	0	0		5.86923	1	0	1	neg.	IU/ml	TaqMan		0,043 Tsd. IU/ml	2.97	µmol/ls	178.2	45	3.96	0.93	µmol/ls	55.8	0.313131	0.78	µmol/ls	46.8	0.86	µmol/ls	51.6	173	µmol/ls	10.38
CWJW0V7KR	21	01.12.1965	47.8333	1	178	85	3	0	3294914	IU/ml	3294914	6.51784	6100000		IU/ml	94			0	0	0	6.51784									137	U/l	137	45	3.04444	77	U/l	77	0.562044	38	U/l	38	50	U/l	50	9290	KU/l	9.29	53.8
CWPD5YCN1	13	27.01.1966	47.6778	1	180	78	3	0	7300000	IU/ml	7300000	6.86332	2100000	<25	IU/ml	14	<25	IU/ml	0	0	0	6.86332	1	0	1	5020000	IU/ml	TaqMan		15 IU/ml	141	U/l	141	45	3.13333	82	U/l	82	0.58156	35	U/l	35	65	U/l	65				46.8
D0G4DR4DC	47	28.05.1975	38.3417	1	182	85	3	1	102000	IU/ml	102000	5.0086	542000	0	IU/ml	0	0	IU/ml	0	0	0	5.0086	1	0	1			TaqMan			299	U/l	299	45	6.64444	144	U/l	144	0.481605	214	U/l	214	62	U/l	62
d2jrvhseg	4	01.03.1963	50.5833	1	178	131	3	0	> 700	IU/ml	700	2.8451		1.04	IU/ml	3190	neg.	IU/ml	0	0	0	2.8451	1	0	1	2550	IU/ml	Amplicor		< 0,043	1.85	µmol/ls	111	45	2.46667	1.08	µmol/ls	64.8	0.583784	0.71	µmol/ls	42.6	0.97	µmol/ls	58.2	125	µmol/ls	7.5	44
d3eadajdl	4	18.05.1972	41.3694	0	168	86.9	3	0	619	IU/ml	619	2.79169		< 0,6	IU/ml		neg.	IU/ml	0	0		2.79169	1	0	1	neg.	IU/ml	Amplicor			3.22	µmol/l	193.2	34	5.68235	1.4	µmol/l	84	0.434783	0.75	µmol/l	45	1.15	µmol/l	69	146	µmol/l	8.76	37
d5xh57ll4	16	30.01.1981	32.6694	0	165	64	3	0	35600	IU/ml	35600	4.55145	32200	< 15	IU/ml								1	< 15	1			TaqMan		< 15	35.6	U/l	35.6	34	1.04706	33.3	U/l	33.3	0.935393	20.8	U/l	20.8	58	U/l	58
d5xq5q7n8	6	04.04.1961	52.4917	1	180	89	3	0	4022781	IU/ml	4022781	6.60453		109	IU/ml	33	0	IU/ml	0	0	0	6.60453	1	0	1			TaqMan		0	195	U/l	195	45	4.33333	111	U/l	111	0.569231	106	U/l	106	54	U/l	54	8.4	KU/l	8.4	59
d80eemws4	21	31.01.1964	49.6694	1	182	100	3	1	1300000	IU/ml	1300000	6.11394		1910	IU/ml		schwach pos.	IU/ml					1	< 12	1	322651	IU/ml	Abbott Real Time PCR	Realtime Abbott	12 IU/ml	81	U/l	81	45	1.8	54	U/l	54	0.666667	42	U/l	42	74	U/l	74
d80s6m9lv	4	20.06.1987	26.2806	1	169	92.7	3	0	> 700000	IU/ml	700000	5.8451		> 700	IU/ml	0	neg.	IU/ml	0	0	0	5.8451	1	0	1	neg.	IU/ml	Amplicor	Roche Amplicor	43 IU/ml	3.21	µmol/l	192.6	45	4.28	1.64	µmol/l	98.4	0.510903	1.03	µmol/l	61.8	1.36	µmol/l	81.6				40
da1f84leg	45	15.11.1958	54.8778	1	172	69	3	0	3700	IU/ml	3700	3.5682	4520		IU/ml	0																		45						85	U/l	85	61	U/l	61				44.7
DDF4DJ6TE	4	03.01.1952	61.7444	1	172	82.3	3	1	242000	IU/ml	242000	5.38382	527000	860	IU/ml	664	0.043	IU/ml	0	0	0	5.38382	1	0	1	337000	IU/ml	TaqMan		0,034 IU/ml	2.61	µkat/l	156.569	45	3.4793	2.84	µkat/l	170.366	1.08812	3.12	µkat/l	187.163	5.26	µkat/l	315.537	40	µkat/l	2.39952	27
dgsl9wx1d	4	01.05.1980	33.4167	1	193	92	3	1	514	IU/ml	514	2.71096		<0,6	IU/ml		< NWG	IU/ml	0	0	0	2.71096	1	0	1	< NWG	IU/ml	Amplicor			2	mmol/l	120	45	2.66667	1.17	mmol/l	70.2	0.585	1.57	mmol/ls	94.2	1.84	mmol/ls	110.4	152	mmol/ls	9.11818	43
dh4hc477k	47	26.02.1984	29.5972	1	178	75	3	0	449000	IU/ml	449000	5.65225	16000	<20	IU/ml	0	<20	IU/ml	0	0	0	5.65225	1	<20	1			TaqMan		20 IU/ml	86	U/l	86	45	1.91111	47	U/l	47	0.546512	26	U/l	26	86	U/l	86	13.6	KU/l	13.6	56.9
djwyck9lj	4	21.01.1973	40.6944	0	161	75	3	0	> 700	IU/ml	700	2.8451		< 100	IU/ml		< 100	IU/ml	100	2		4.8451	1	0	1	< 100	IU/ml	Amplicor			1.84	µmol/l	110.4	34	3.24706	0.91	µmol/l	54.6	0.494565	0.37	µmol/l	22.2	0.46	µmol/l	27.6	106	µmol/l	6.36	37
DKV6TUSEW	8	19.03.1982	31.5333	1	187	80.5	2	0	3140000	IU/ml	3140000	6.49693	2000000	neg	IU/ml	0			0	0	0	6.49693						TaqMan		15 IE/ml	53	U/l	53	45	1.17778	32	U/l	32	0.603774	22	U/l	22	62	U/l	62				5
dp4mgklua	23	29.04.1965	48.4222	1	184	82	2	0	1510000	IU/ml	1510000	6.17898		nd	IU/ml		<5	IU/ml	5	0.69897		6.87795	1	<5	1	< 5		Sonstiges	QNT Heptimax	5 IU/ml	85	U/l	85	45	1.88889	77	U/l	77	0.905882				53	U/l	53				46
dpldncjxu	47	23.01.1976	37.6889	1	164	72	3	0	951000	IU/ml	951000	5.97818	15	<20	IU/ml	0	neg.	IU/ml	0	0	0	5.97818	1	0	1	neg.	IU/ml	TaqMan		20 IU/ml	42	U/l	42	45	0.933333	28	U/l	28	0.666667	25	U/l	25	84	U/l	84	10.3	KU/l	10.3	57.9
dsudk7g1p	11	03.03.1965	48.5778	0	174	92.9	3	0	616798	IU/ml	616798	5.79014																TaqMan		15 IU/ml	73	U/l	73	34	2.14706	44	U/l	44	0.60274	21	U/l	21	56	U/l	56				38.6
dtjd1nun2	23	09.06.1966	47.3111	0	174	102	3	0	236800	IU/ml	236800	5.37438	322000	<615	IU/ml	615	neg.	IU/ml	0	0	0	5.37438	1	0	1	< 615	IU/ml	Sonstiges	Siemens Branched DNA	615 IU/ml	279	U/l	279	34	8.20588	171	U/l	171	0.612903	138	U/l	138	114	U/l	114
duk1ytdfc	23	11.02.1989	24.6389	0	174	54	3	0	3635000	IU/ml	3635000	6.5605		<615	IU/ml	0	<615	IU/ml	0	0	0	6.5605	1	0	1	< 615	IU/ml	Sonstiges	Siemens Branched DNA	615 IU/ml	49	U/l	49	34	1.44118	47	U/l	47	0.959184	24	U/l	24	48	U/l	48
dvl0f121k	47	02.02.1969	44.6639	1	182	100	3	0	4700000	IU/ml	4700000	6.6721	2930000	56	IU/ml	20.6	<20	IU/ml	0	0	0	6.6721	1	< 20	1			TaqMan		20 IU/ml	229	U/l	229	45	5.08889	114	U/l	114	0.497817	79	U/l	79	59	U/l	59	9.3	KU/l	9.3
dxhpqax3m	23	10.11.1965	47.8917	0	176	63	3	0	55130	IU/ml	55130	4.74139	134000	<615	IU/ml	0	< 615	IU/ml	615	2.78888		7.53026	1	0	1	< 615	IU/ml	Sonstiges	Siemens Branched DNA	615 IU/ml	54	U/l	54	34	1.58824	30	U/l	30	0.555556	34	U/l	34	61	U/l	61
dy1ej34gs	47	15.04.1956	57.4611	1	170	65	3	0	32500	IU/ml	32500	4.51188	546	< 20	IU/ml	0	< 20	IU/ml	0	0	0	4.51188	1	< 20	1	< 20	IU/ml	TaqMan		20 IU/ml	100	U/l	100	45	2.22222	67	U/l	67	0.67	64	U/l	64	84	U/l	84
DY7D10JUS	47	28.08.1976	37.0917	0	150	65	3	0	935000	IU/ml	935000	5.97081	264000	2750	IU/ml		neg	IU/ml	0	0		5.97081	1	0	1	0	IU/ml	TaqMan		<15	54	U/l	54	34	1.58824	40	U/l	40	0.740741	31	U/l	31	128	U/l	128	8.2	KU/l	8.2	42.3
e0j5ga6nl	23	08.12.1963	49.8139	1	184	82	3	0	171700	IU/ml	171700	5.23477		neg.	IU/ml		neg.	IU/ml	0	0	0	5.23477	1	< 615	1	nd	IU/ml	Sonstiges	Siemens Branched DNA	615 IU/ml	193	U/l	193	45	4.28889	120	U/l	120	0.621762	105	U/l	105	71	U/l	71
E2V0UNU55	42	31.10.1958	54.9194	0	168	95	2	0	2,4*10^5	IU/ml	240000	5.38021	37100	<25	IU/ml	0	neg	IU/ml	0	0	0	5.38021	1	<25	1	<25	IU/ml	TaqMan		<25	96	U/l	96	34	2.82353	78	U/l	78	0.8125	35	U/l	35	79	U/l	79	8.374	KU/l	8.374	4.5
E4P0M2UAV	17	20.12.1962	50.7806	0	164	60	3	0	1400000	IU/ml	1400000	6.14613		neg	IU/ml																12	U/l	12	34	0.352941	23	U/l	23	1.91667	16	U/l	16	61	U/l	61	7.406	KU/l	7.406	40.6
e5xatalgn	47	14.05.1971	42.3806	1	182	110	3	1	582000	IU/ml	582000	5.76492	48800	97	IU/ml	39.4	250	IU/ml	250	2.39794	147	8.16286	1	250	0			TaqMan		20 IU/ml	127	U/l	127	45	2.82222	149	U/l	149	1.17323	152	U/l	152	114	U/l	114	3.5	KU/l	3.5	43.2
e7mawnnfa	106	23.09.1972	41.0222	1	192	111	3	0	479835	KIU/ml	479835000	8.68109	85300	neg.	IU/ml		nd	IU/ml	0	0	0	8.68109	1					Sonstiges	in-house PCR	30 IU/ml	89.6	U/l	89.6	45	1.99111	50.2	U/l	50.2	0.560268	72.9	U/l	72.9	78.7	U/l	78.7	10.36	KU/l	10.36	44.5
e84gpkrad	25	25.10.1965	47.9333	1	174	102.5	2	0	2541635	IU/ml	2541635	6.40511																			118	U/l	118	45	2.62222	96	U/l	96	0.813559	107	U/l	107	111	U/l	111				55
E8QJC42SR	17	06.01.1962	51.7361	0	154	62.6	3	0	764458	IU/ml	764458	5.88335	240000	31929	IU/ml																34	U/l	34	34	1	31	U/l	31	0.911765	66	U/l	66	48	U/l	48
e8rn90v75	106	30.12.1967	45.7528	1	186	91	3	0	90300	IU/ml	90300	4.95569	2000	< 25	IU/ml	0	n.d.	IU/ml	0	0	0	4.95569	1	<25	1	neg.	IU/ml	TaqMan		10 IU/ml	43.5	U/l	43.5	45	0.966667	43.5	U/l	43.5	1	31	U/l	31	73.2	U/l	73.2	10.53	KU/l	10.53
ea7esn27g	44	27.06.1956	57.2611	0	169	79	3	0	243833	IU/ml	243833	5.38709	3380000	neg	IU/ml	0	neg	IU/ml	0	0	0	5.38709	1	0	1	0	IU/ml	TaqMan		< 25 IU/ml	89.5	U/l	89.5	34	2.63235	88.5	U/l	88.5	0.988827	97.4	U/l	97.4	92.4	U/l	92.4				42.2
eakjq8dj0	11	28.11.1983	29.8417	1	176	93	2	0	6466000	IU/ml	6466000	6.81064		< NG	IU/ml		< 10	IU/ml	10	1		7.81064	1			nicht vorhand.		TaqMan		< 10 IU/ml	115	U/l	115	45	2.55556	43	U/l	43	0.373913	27	U/l	27	61	U/l	61				44.1
ecerfrgs4	25	08.07.1974	39.2306	1	170	63	3	0	3371272	IU/ml	3371272	6.52779																			468	U/l	468	45	10.4	245	U/l	245	0.523504	95	U/l	95	91	U/l	91	7.3	KU/l	7.3	50.9
ecg1pjve5	85	30.04.1958	55.4194	0	172	66	3	0	150000	IU/ml	150000	5.17609		70	IU/ml								0								15	U/l	15	34	0.441176	24	U/l	24	1.6	37	U/l	37	84	U/l	84				61.3
ecg5x05c4	106	27.05.1967	46.3444	1	176	75	3	0	1670000	IU/ml	1670000	6.22272	1410000	< 25	IU/ml	0	n.d.	IU/ml	0	0	0	6.22272	1	0	1	neg.	IU/ml	TaqMan		10 IU/ml	128	U/l	128	45	2.84444	54.5	U/l	54.5	0.425781	35.3	U/l	35.3				8.88	KU/l	8.88	44.8
eclee24ul	11	24.02.1978	35.6028	1	180	100	3	0	619188	IU/ml	619188	5.79182		< 10	IU/ml			IU/ml					1	< 10	1	< 10	IU/ml	TaqMan		< 10 IU/ml	203	U/l	203	45	4.51111	84	U/l	84	0.413793	188	U/l	188	90	U/l	90
ED7CVY57L	35							0			84600	4.92737	84600						0	0	0	4.92737
eeqjx3vjh	106	10.09.1973	40.0583	0	178	79	2	0	140000	IU/ml	140000	5.14613	2520000	nicht nach.	IU/ml	0	nd	IU/ml	0	0	0	5.14613	1	0	1	< nwg	IU/ml	Sonstiges	in-house PCR	30 IU/ml	36	U/l	36	34	1.05882	25	U/l	25	0.694444	28	U/l	28	50	U/l	50
eeqq2clvj	11	30.12.1975	37.7528	1	180	84	3	0	2703000	IU/ml	2703000	6.43185		neg.	IU/ml		< 15	IU/ml	15	1.17609		7.60794	0					Sonstiges	PCR	> 10 IU/ml	124	U/l	124	45	2.75556	45	U/l	45	0.362903	25	U/l	25	83	U/l	83				43.3
efqdtkc6f	25	01.02.1984	29.6667	0	163	71	3	0	32840	Kopien/ml	12630.8	4.10143		21	IU/ml		0	IU/ml	0	0		4.10143						Abbott Real Time PCR	Real Time Abbott	< 12	116	U/l	116	34	3.41176	63	U/l	63	0.543103	14	U/l	14	50	U/l	50	8.9	KU/l	8.9	57.7
eg82ln8jx	11	14.12.1962	50.7972	0	166	57	3	0	20000	IU/ml	20000	4.30103											0							> 10 IU/ml	22	U/l	22	34	0.647059	25	U/l	25	1.13636	24	U/l	24
egdv12ys4	85	24.03.1975	38.5194	1	179	96	3	0	3400000	IU/ml	3400000	6.53148		48	IU/ml		< 10	IU/ml	10	1		7.53148	1	0	1	neg.	IU/ml	TaqMan			76	U/l	76	45	1.68889	83	U/l	83	1.09211	79	U/l	79	63	U/l	63				64.2
eh9w4q5rq	11	16.04.1984	29.4583	1	175	48	3	0	7968000	IU/ml	7968000	6.90135		< 10	IU/ml		nd	IU/ml					1	< 10	1	< 10		TaqMan		< 10 IU/ml	116	U/l	116	45	2.57778	93	U/l	93	0.801724	175	U/l	175	106	U/l	106
ej6hh0c9a	148	10.03.1973	40.5583	0	164	88	3	0	230000	IU/ml	230000	5.36173					< 10	IU/ml	0	0	0	5.36173	0					TaqMan		10 IU/ml	139	U/l	139	34	4.08824	88	U/l	88	0.633094	153	U/l	153	66	U/l	66	9.6	KU/l	9.6	45.2
EKS2UUHL7	20							0			0	0	0
elvtedhfm	11	03.10.1967	45.9944	1	180	85	3	0	328236	IU/ml	328236	5.51619		< NWG	IU/ml		< NWG	IU/ml	15	1.17609		6.69228	1			<NWG	IU/ml	TaqMan		15 IU/ml	172	U/l	172	45	3.82222	81	U/l	81	0.47093	26	U/l	26	86	U/l	86
EMEW0QQ4T	33	29.12.1976	36.7556	1	172	68	3	0	19600	IU/ml	19600	4.29226																			73	U/l	73	45	1.62222	67	U/l	67	0.917808	19	U/l	19	58	U/l	58	8.58	KU/l	8.58	55.3
enl4ephk5	11	12.03.1979	34.5528	1	177	55	3	0	382407	IU/ml	382407	5.58253		100	IU/ml		< NWG	IU/ml	15	1.17609		6.75862	1	0	1			TaqMan		< 15 IU/ml	142	U/l	142	45	3.15556	93	U/l	93	0.65493	90	U/l	90	101	U/l	101				43.9
eq0312quj	11	14.04.1962	51.4639	0		70	2	0	14266000	IU/ml	14266000	7.1543		45184	IU/ml		reaktiv	IU/ml					1	0	1	<nwg	IU/ml	TaqMan		<15	44	U/l	44	34	1.29412	42	U/l	42	0.954545	54	U/l	54							39.7
EQ7F39UF6	73	12.10.1960	52.9694	0	166	56	2	0	1810000	IU/ml	1810000	6.25768		18	IU/ml								1	0	1	0	IU/ml				34	U/l	34	34	1	39	U/l	39	1.14706	12	U/l	12	83	U/l	83
es0f477q4	11	19.03.1974	39.5333	1		86	3	0	97261	IU/ml	97261	4.98794											0					TaqMan		< 15 IU/ml	58	U/l	58	45	1.28889	36	U/l	36	0.62069	69	U/l	69	70	U/l	70
EUD9HTR0F	55	20465	57.7222	0	168	107	3	0			2801531	6.4474				0			0	0	0	6.4474		0	1	0		TaqMan		< 15			96	34	2.82353			82	0.854167	48		48			92			8
EUFC9JDMA	44	01.04.1962	51.5	1	165	70	3	0	1270000	IU/ml	1270000	6.1038	2600000	neg	IU/ml	14															71	U/l	71	45	1.57778	44	U/l	44	0.619718	92	U/l	92	78	U/l	78				44
EV2LM9KLG	21	02.07.1949	64.2472	1	175	78	3	0	1387596	IU/ml	1387596	6.14226	3600000	26654	IU/ml	18000			15	1.17609	15	7.31835									151	U/l	151	45	3.35556	72	U/l	72	0.476821	43	U/l	43	68	U/l	68	9165	KU/l	9.165	54.4
EVH8ND3XS	7	06.04.1983	30.4861	1	168	96	3	0	15900000	IU/ml	15900000	7.2014	8800000	<25	IU/ml	14	neg.	IU/ml	0	0	0	7.2014	1	0	1	neg.	IU/ml	TaqMan		<25 IU/ml	233	U/l	233	45	5.17778				0	74	U/l	74	97	U/l	97	10040	U/l	10.04
ewq9vu8mf	1	19.07.1957	56.2	0	167	58.8	3	0	323000	IU/ml	323000	5.5092		5330	IU/ml		neg.	IU/ml	0	0		5.5092						TaqMan		15 IU/ml	25	U/l	25	34	0.735294	23	U/l	23	0.92	16	U/l	16	60	U/l	60	8.07	KU/l	8.07	40
exf3egfk1	67	01.03.1975	38.5833	1	184	65	3	0	2171000	IU/ml	2171000	6.33666	1950000	nd	IU/ml	14	nd	IU/ml	0	0	0	6.33666	1	< 15	1			TaqMan		< 15 IU/ml	166	U/l	166	45	3.68889	79	U/l	79	0.475904	72	U/l	72	98	U/l	98	10.1	KU/l	10.1	64.5
f275v0263	67	16.11.1974	38.875	1	176	72	2	0	918500	IU/ml	918500	5.96308	694000	< 15	IU/ml	0	< 15	IU/ml	0	0	0	5.96308	1	< 15	1	< 15	IU/ml	TaqMan		< 15 IU/ml	134	U/l	134	45	2.97778	86	U/l	86	0.641791	64	U/l	64	60	U/l	60	10.4	KU/l	10.4	61.6
f40lgesx3	67	03.01.1979	34.7444	1	183	96	3	0	50170	IU/ml	50170	4.70044		nd		0	< 15	IU/ml	0	0	0	4.70044	1	< 15	1	< 15	IU/ml	TaqMan		< 15 IU/ml	196	U/l	196	45	4.35556	70	U/l	70	0.357143	119	U/l	119	92	U/l	92	11.3	KU/l	11.3	63.3
f4aj0ndtm	25	01.11.1968	44.9167	1	178	97.8	3	0																										45
f6rhggq4n	25	27.06.1976	37.2611	1	170	73	3	0	1590595	IU/ml	1590595	6.20156		0	IU/ml		0	IU/ml	0	0		6.20156	1	0	1	639699	IU/ml	Abbott Real Time PCR	Abbott Realtime PCR	0	452	U/l	452	45	10.0444	267	U/l	267	0.590708	111	U/l	111	69	U/l	69
f8046qc60	25	19.07.1972	41.2	1	175	65	3	0																										45
f8rxvhcyp	25	12.10.1978	34.9694	0	173	75	3	0	255006	IU/ml	255006	5.40655		< 12	IU/ml																54	U/l	54	34	1.58824	51	U/l	51	0.944444	68	U/l	68	101	U/l	101
ffqunqg4x	1	13.06.1967	46.3	1	184	85	3	0	21000	IU/ml	21000	4.32222		neg.	IU/ml																100	U/l	100	45	2.22222	58	U/l	58	0.58	177	U/l	177	84	U/l	84	10.5	KU/l	10.5	42
FGSW5SE21	6	27.09.1979	34.0111	0	163	46	3	0	163388	IU/ml	163388	5.21322		0	IU/ml	0	0	IU/ml	0	0	0	5.21322	1	0	1	0	IU/ml	TaqMan		0	64.8	U/l	64.8	34	1.90588	37.2	U/l	37.2	0.574074	15	U/l	15	42	U/l	42				59.7
fhdtgeu5m	17	29.08.1968	45.0889	1	179	66	3	0	2600000	IU/ml	2600000	6.41497	1730000	270	IU/ml	3900	< 12	IU/ml	0	0	0	6.41497	1	< 12	1			Sonstiges	PCR	< 12 - 50 IU/ml	161	U/l	161	45	3.57778	86	U/l	86	0.534161	30	U/l	30	60	U/l	60	5.503	KU/l	5.503	6.97
fj7qfqtjq	45	24.01.1981	32.6861	0	168	61	3	0	215	IU/ml	215	2.33244	15	neg.	IU/ml	15	0	IU/ml	0	0	0	2.33244	1	0	1	0	IU/ml	Sonstiges	PCR	43 IE/ml bis 69 Mio. IE/ml				34									100	U/l	100
fkc4807ag	6	16.01.1957	56.7083	0	169	68	3	0	1561082	IU/ml	1561082	6.19343		15	IU/ml	0	0	IU/ml	0	0	0	6.19343	1	0	1	0	IU/ml	TaqMan		0	173	U/l	173	34	5.08824	136	U/l	136	0.786127	52.8	U/l	52.8
fkvqdjcu4	71	22.02.1960	53.6083	0	174	68	3	0	380000	IU/ml	380000	5.57978	25400	13000	IU/ml	7070	48000	IU/ml	48000	4.68124		10.261	1	530	0			Amplicor		<10 U/ml	43	U/l	43	34	1.26471	86	U/l	86	2	403	U/l	403	91	U/l	91	7	KU/l	7	7.8
FMGGNP0PK	142	03.08.1977	36.1611	1	171	65	3	0	1616246	IU/ml	1616246	6.20851	6600000	2091	IU/ml	990	neg	IU/ml	0	0	0	6.20851	1	<12	1	<12	IU/ml	Abbott Real Time PCR	Abbott	12IU/ml	101	U/l	101	45	2.24444	49	U/l	49	0.485149	49	U/l	49	45	U/l	45				62.2
fn0yj78an	55	13.04.1978	35.4667	1	170	77	2	0	7070000	IU/ml	7070000	6.84942		nicht nachw.	IU/ml		nicht nachw.	IU/ml	0	0		6.84942	1			nicht nachw.		Sonstiges	PCR					45						37			59						58.5
fnf8ag3ru	6	11.01.1966	47.7222	1	170	58	3	0	86000	IU/ml	86000	4.9345	0	neg.	IU/ml	0	0	IU/ml	0	0	0	4.9345	1	0	1			TaqMan		0	28	U/l	28	45	0.622222	27	U/l	27	0.964286	58	U/l	58	85	U/l	85	90.71	U/l		39.4
fp2n3e6qa	71	21.04.1983	30.4444	1	175	70.1	3	0	140000	IU/ml	140000	5.14613			IU/ml		< 10	IU/ml	10	1		6.14613	1	< 10	1	< 10	IU/ml	TaqMan		10 IU/ml	39	U/l	39	45	0.866667	28	U/l	28	0.717949	44	U/l	44	81	U/l	81	8.4	KU/l	8.4	48
fpx1javsn	55	25.08.1964	49.1	0	170	79	3	0	343000	IU/ml	343000	5.53529			IU/ml		neg.	IU/ml	0	0		5.53529	1	0	1	nicht nachw.					36	U/l	36	34	1.05882	29	U/l	29	0.805556	31	U/l	31	54	U/l	54	10.7	KU/l	10.7	55.7
fq0v4dgkv	25	06.10.1980	32.9861	1	185	87.2	3	0	414644	IU/ml	414644	5.61768		0	IU/ml		0	IU/ml	0	0		5.61768						Abbott Real Time PCR	Real Time Abbott	< 12	164	U/l	164	45	3.64444	74	U/l	74	0.45122	56	U/l	56	67	U/l	67	9.9	KU/l	9.9	52.7
fq2kyk868	6	26.04.1963	50.4306	0	172	60	3	0	157000	IU/ml	157000	5.1959	25700	48000	IU/ml	16800	neg.	IU/ml	0	0	0	5.1959	1	0	1	neg.	IU/ml	TaqMan		0	123	U/l	123	34	3.61765	73	U/l	73	0.593496	200	U/l	200	182	U/l	182	8.028	KU/l	8.028	37.6
fq3yhsn85	71	19.10.1981	31.95	0	170	75.3	3	0	60	IU/ml	60	1.77815			IU/ml		< 10	IU/ml	10	1		2.77815	1	< 10	1	< 10	IU/ml	TaqMan		10 IU/ml	15	U/l	15	34	0.441176	25	U/l	25	1.66667	42	U/l	42	98	U/l	98	9.2	KU/l	9.2	50
frm2821yx	78	14.05.1979	34.3806	0	167	63	3	0	3300	IU/ml	3300	3.51851		neg.	IU/ml		neg.	IU/ml	0	0		3.51851	1	0	1			TaqMan		< 15 IU/ml	39	U/l	39	34	1.14706	55	U/l	55	1.41026	25	U/l	25	93	U/l	93				63.1
FSTRKL846	22	19.10.1979	33.95	0	161	53	3	0	3750	IU/ml	3750	3.57403		10	IU/ml	0	neg.	IU/ml	0	0	0	3.57403	1	0	1			TaqMan		10 IU/ml	232	U/l	232	34	6.82353	131	U/l	131	0.564655	30	U/l	30	69	U/l	69	6.9	KU/l	6.9	49.3
fstwt0ukd	42	11.03.1957	56.5556	0	166	70.5	2	0	3600000	IU/ml	3600000	6.5563		neg.	IU/ml		neg.	IU/ml	0	0		6.5563	1	0	1	neg	IU/ml	TaqMan		<25	29.2	U/l	29.2	34	0.858824	27.6	U/l	27.6	0.945205	22	U/l	22	84	U/l	84	8.754	KU/l	8.754	4.5
futg5gxxx	16	08.04.1977	36.4806	1	176	60	3	0	3120000	IU/ml	3120000	6.49415	1350000	neg.	IU/ml								0					TaqMan		< 15 IU/ml	33.3	U/l	33.3	45	0.74	34.4	U/l	34.4	1.03303	14.7	U/l	14.7	44	U/l	44	6.383	KU/l	6.383	62.7
fuwcpl297	71	05.10.1962	50.9889	1	180	61	2	0	12000000	IU/ml	12000000	7.07918	603000	< 10	IU/ml	0	<10	IU/ml	10	1		8.07918	1	<10	1			Amplicor		<10 IU/ml	17	U/l	17	45	0.377778	47	U/l	47	2.76471	109	U/l	109	102	U/l	102	5.4	KU/l	5.4	7.2
fvmqr2fd6	16	14.05.1980	33.3806	0	175	78	2	0	151000	IU/ml	151000	5.17898	75900	neg.	IU/ml	0	nd						1	0	1	neg. qual.	IU/ml	TaqMan		> 15 IU/ml	80.4	U/l	80.4	34	2.36471	59.8	U/l	59.8	0.743781	10.7	U/l	10.7	46	U/l	46
FW0A38UDG	12	26.10.1984	28.9306	1	187	93	3	0	73500	IU/ml	73500	4.86629	137000	0	IU/ml		0	IU/ml	0	0		4.86629	1	0	1			TaqMan		15 iu/ml	36	U/l	36	45	0.8	34	U/l	34	0.944444	43	U/l	43	75	U/l	75	10.1	KU/l	10.1	4.9
fw72g6370	78	24.09.1984	29.0194	0	163	57	3	0	neg.	IU/ml	0	0	1500										0					TaqMan		< 15 IU/ml	30	U/l	30	34	0.882353	41	U/l	41	1.36667	23	U/l	23
fwvrl6fhf	25	04.12.1979	33.825	1	174	82	3	0	15216	Kopien/ml	5852.31	3.76733																			155	U/l	155	45	3.44444	62	U/l	62	0.4	204	U/l	204
FX5H8LC4Y	12	21.08.1983	30.1111	1	179	99	3	0	401000	IU/ml	401000	5.60314	1230000	0	IU/ml		0	IU/ml	0	0	0	5.60314	1	0	1	0	IU/ml	TaqMan		15 iu/ml	115	U/l	115	45	2.55556	58	U/l	58	0.504348	47	U/l	47	51	U/l	51	9.4	KU/l	9.4
FX6F9GVYE	85	17.08.1966	47.1222	1	177	78.5	3	0	3300000	IU/ml	3300000	6.51851	630000	<10	IU/ml		<10	IU/ml	0	0	0	6.51851						TaqMan		10IU/ml	266	U/l	266	45	5.91111	135	U/l	135	0.507519	75	U/l	75	79	U/l	79				61.1
fxphr5y56	1	16.02.1978	35.625	0	159	88	3	0	8900000	IU/ml	8900000	6.94939		neg.	IU/ml		neg.	IU/ml	0	0		6.94939	1	0	1	neg.	IU/ml	TaqMan		< 15	137	U/l	137	34	4.02941	62	U/l	62	0.452555	21	U/l	21	52	U/l	52	8.66	KU/l	8.66	39
fy4vx7ht7	25	06.03.1986	27.5694	1	173	88	3	0	1123486	IU/ml	1123486	6.05057		neg.	IU/ml		neg.	IU/ml	0	0	0	6.05057	1	0	1			Sonstiges	PCR	0	227	U/l	227	45	5.04444	151	U/l	151	0.665198	175	U/l	175	67	U/l	67
FYHCRKSPA	12	02.08.1951	62.1639	1	175	90	2	0	2360000	IU/ml	2360000	6.37291	3420000	0	IU/ml								0								22	U/l	22	45	0.488889	19	U/l	19	0.863636	33	U/l	33	88	U/l	88	8.3	KU/l	8.3
fynmlfesm	1	15.09.1985	28.0444	1	189	80	3	0	35700	IU/ml	35700	4.55267		neg.	IU/ml		neg.	IU/ml	0	0		4.55267	0					TaqMan		< 15 IU/ml	119	U/l	119	45	2.64444	71	U/l	71	0.596639	32	U/l	32	100	U/l	100	8.75	KU/l	8.75	44
G1SAYACJL	12	29.06.1959	54.2556	1	175	87	3	0	73600	IU/ml	73600	4.86688	124000	16	IU/ml	24.8	0	IU/ml	0	0		4.86688	1	0	1	0	IU/ml	TaqMan		15 iu/l	53	U/l	53	45	1.17778	36	U/l	36	0.679245	28	U/l	28	60	U/l	60	12.3	KU/l	12.3	4.4
g2pw7tfht	68	28.02.1959	54.5861	1	189	97	2	0	8,98*10^6	IU/ml	8980000	6.95328	2070000	<15	IU/ml	14	<15	IU/ml	0	0	0	6.95328	1	<15	1	<15	IU/ml	TaqMan	Roche Cobas	<15	44	U/l	44	45	0.977778	36	U/l	36	0.818182	35	U/l	35	57	U/l	57	7179	KU/l	7.179	56.4
g30fnerc3	28	31.12.1952	60.7528	1	173	88	3	0	141000	IU/ml	141000	5.14922	141000	grenzwertig	IU/ml	0							0					TaqMan		15IU/ml	229	U/l	229	45	5.08889	140	U/l	140	0.611354	347	U/l	347	68	U/l	68	10	KU/l	10	4.7
g30nh69wq	44	06.08.1969	44.1528	1	186	70	3	0	189520	IU/ml	189520	5.27766	222000	36.2	IU/ml	31	neg	IU/ml	0	0	0	5.27766						TaqMan		<15	113	U/l	113	45	2.51111	105	U/l	105	0.929204	180	U/l	180	68.4	U/l	68.4				37.2
g5fs93a7e	28	04.10.1977	35.9917	0	162	74	2	0	519x 10 3	IU/ml	519000	5.71517	61700	neg.	IU/ml	0	neg.	IU/ml	0	0	0	5.71517	1	0	1	neg.	IU/ml	TaqMan		15IU/ml	49	U/l	49	34	1.44118	62	U/l	62	1.26531	11	U/l	11	60	U/l	60				4.1
g624rhf9w	42	17.06.1955	58.2889	1	176	73	2	0		IU/ml				930	IU/ml		< 25	IU/ml	25	1.39794			1	0	1	neg	IU/ml	TaqMan		<25	62.1	U/l	62.1	45	1.38	56.1	U/l	56.1	0.903382	132	U/l	132	62	U/l	62	8.216	KU/l	8.216	4.1
g66vpnheq	85	03.12.1960	52.8278	1	172	89.3	3	0	2200000	IU/ml	2200000	6.34242		500	IU/ml		< 10	IU/ml	10	1		7.34242	1			pos. < 10	IU/ml	Sonstiges	PCR	10 IU/ml				45						49	U/l	49	76	U/l	76				56.5
g6lqv702h	68	02.09.1961	52.0806	1	173	94	3	0	481000	IU/ml	481000	5.68215	828000	< 15	IU/ml	14	< 15	IU/ml	0	0	0	5.68215	1	< 15	1	< 15	IU/ml	TaqMan		< 15 IU/ml	79	U/l	79	45	1.75556	45	U/l	45	0.56962	60	U/l	60	96	U/l	96	10.567	KU/l	10.567	54.8
g7mnsj2rt	42	05.07.1969	44.2389	0	160	54	3	0	3400000	IU/ml	3400000	6.53148		neg.	IU/ml		neg.	IU/ml	0	0		6.53148	1	0	1	neg	IU/ml	TaqMan		<25	65	U/l	65	34	1.91176	63	U/l	63	0.969231	36	U/l	36	39	U/l	39	5.659	KU/l	5.659	4.4
g7tvd0asf	87	08.01.1967	46.7306	1	176	81	3	0	714000	IU/ml	714000	5.8537																Amplicor		zw. 43 und 69 IU/ml	149	U/l	149	45	3.31111	88	U/l	88	0.590604	37	U/l	37	113	U/l	113
g8mlte9j3	68	01.09.1968	45.0833	1	178	94	3	0	890000	IU/ml	890000	5.94939		< 15	IU/ml	14	< 15	IU/ml	0	0	0	5.94939	1	< 15	1	< 15	IU/ml	TaqMan		< 15 IU/ml	228	U/l	228	45	5.06667	96	U/l	96	0.421053	111	U/l	111	64	U/l	64	9.205	KU/l	9.205	60.2
g8sh2kndw	1	16.08.1960	53.125	0	163	60	3	0	5680000	IU/ml	5680000	6.75435		5030	IU/ml		neg.	IU/ml	0	0		6.75435						TaqMan		15 IU/ml	35	U/l	35	34	1.02941	48	U/l	48	1.37143	23	U/l	23	38	U/l	38	9.28	KU/l	9.28	42
gauhurnt1	68	04.03.1967	46.575	1	180	75	3	0	6370000	IU/ml	6370000	6.80414	4490000	< 15	IU/ml	0	< 15	IU/ml	0	0	0	6.80414	1	< 15	1	< 15	IU/ml	TaqMan	Roche Ampliprep	15 IU/ml	113	U/l	113	45	2.51111	49	U/l	49	0.433628	22	U/l	22	65	U/l	65	7.579	KU/l	7.579	36.8
gayx5yfqd	17	01.11.1980	32.9167	1	187	60.2	3	0	1400000	IU/ml	1400000	6.14613		nd			<12	IU/ml	12	1.07918	12	7.22531	1	0	1	0	IU/ml	Abbott Real Time PCR	PCR Abbott Real Time	< 15-50 IU/ml	43	U/l	43	45	0.955556	27	U/l	27	0.627907	16	U/l	16	57	U/l	57
gclm282un	1	25.06.1975	38.2667	1	171	72	3	0	5590000	IU/ml	5590000	6.74741		113	IU/ml								0					TaqMan		< 15 IU/ml	204	U/l	204	45	4.53333	66	U/l	66	0.323529	60	U/l	60	66	U/l	66	8.73	KU/l	8.73	42
ge6xcy214	68	21.01.1983	30.6944	0	167	53	3	0	78600	IU/ml	78600	4.89542																			74	U/l	74	34	2.17647	52	U/l	52	0.702703	22	U/l	22	47	U/l	47	9.654	KU/l	9.654	43.4
GEQKGEEXX	55	15.05.1967	46.3778	1	170	80	3	0	3140	IU/ml	3140	3.49693	15	<25	IU/ml	14			0	0		3.49693	1			0		TaqMan		25 IU/ml	480	U/l	480	45	10.6667	199	U/l	199	0.414583	174	U/l	174	59	U/l	59	12.2	KU/l	12.2	56.8
gesyjv4dt	1	23.01.1965	48.6889	0	165	57	3	0	351000	IU/ml	351000	5.54531			IU/ml																53	U/l	53	34	1.55882	45	U/l	45	0.849057	29	U/l	29	52	U/l	52	8.44	KU/l	8.44	42
ghter3fsr	1	07.02.1958	55.65	1	187	90	2	0	12800000	IU/ml	12800000	7.10721		46	IU/ml		neg.	IU/ml	0	0		7.10721	1					TaqMan		15 IU/ml	51	U/l	51	45	1.13333	49	U/l	49	0.960784	18	U/l	18	54	U/l	54	2.22	KU/l	2.22	45
gjsunaa9k	1	09.07.1964	49.2278	1	181	75	2	0	4310000	IU/ml	4310000	6.63448		neg.	IU/ml								0					TaqMan		< 15 IU/ml	542	U/l	542	45	12.0444	206	U/l	206	0.380074	159	U/l	159	78	U/l	78	7	KU/l	7	40
GK4SDKC9U	35	17.11.1970	42.8722	1	175	62	3	0	69100	IU/ml	69100	4.83948	61100										1	105000	0			TaqMan	Cobas Ampli Prep	0,015 KIU/ml	33	U/l	33	45	0.733333	26	U/l	26	0.787879	26	U/l	26	86	U/l	86	8421	KU/l	8.421	44
GKJ04V8T1	152	20.04.1972	41.4472	0	160	68	3	0	15000000	IU/ml	15000000	7.17609		360	IU/ml		neg	IU/ml	0	0		7.17609												34						17	U/l	17	64	U/l	64				41
GLG6PKDJJ	35	03.01.1949	64.7444	1	170	84	2	0	4600	IU/ml	4600	3.66276		neg	IU/ml	0	neg.	IU/ml	0	0	0	3.66276	1	0	1	neg	IU/ml	Amplicor		50 KIU/ml	38	U/l	38	45	0.844444	38	U/l	38	1	46	U/l	46	70	U/l	70	8	KU/l	8
gmjd3201w	47	20.03.1987	26.5306	1	175	57	3	0	3000	IU/ml	3000	3.47712	11800	neg.	IU/ml	0	nd	IU/ml	0	0	0	3.47712						TaqMan		< 20 IU/ml	220	U/l	220	45	4.88889	47	U/l	47	0.213636	115	U/l	115	111	U/l	111	9.5	KU/l	9.5	54.4
GP3WH2PDF	85	16.09.1972	41.0417	1	171	83.6	3	0	630000	IU/ml	630000	5.79934		<10	IU/ml	14	<10	IU/ml	0	0	0	5.79934	1	<10	1	1200000	IU/ml	TaqMan		10 IU/ml	175	U/l	175	45	3.88889	132	U/l	132	0.754286	101	U/l	101	113	U/l	113				52.6
gpk1fnnhd	123	30.05.1965	48.3361	1	186	80	3	0	1300000	IU/ml	1300000	6.11394	92600	38	IU/ml	24															164	U/l	164	45	3.64444	156	U/l	156	0.95122	218	U/l	218	111	U/l	111	6.2
GPW09SF9Q	35	13.07.1976	37.2167	0	170	79	3	0	1240000	IU/ml	1240000	6.09342	609000	neg	IU/ml	0	neg	IU/ml	0	0	0	6.09342	1	0	1	neg	IU/ml	Amplicor		50 IU/ml	269	U/l	269	34	7.91176	237	U/l	237	0.881041	203	U/l	203	270	U/l	270	6977	KU/l	6.977	45
gqpsgnu6n	123	23.07.1957	56.1889	1	185	95	3	0			2650000	6.42325	2650000	20	IU/ml	14	< 10	IU/ml	0	0	0	6.42325	1	< 10	1						76	U/l	76	45	1.68889	54	U/l	54	0.710526	167	U/l	167	42	U/l	42				64
GQSUUEA4J	35	24.09.1977	36.0194	1	181	70	3	0	40600	IU/ml	40600	4.60853	249000	neg	IU/ml	0	neg	IU/ml	0	0	0	4.60853	1	0	1	neg	IU/ml	Amplicor		50 IU/ml	71	U/l	71	45	1.57778	67	U/l	67	0.943662	129	U/l	129	54	U/l	54	9691	KU/l	9.691	45
grjtxcwcx	1	07.06.1968	45.3167	0	165	73	3	0	233000	IU/ml	233000	5.36736		201	IU/ml		neg.	IU/ml	0	0		5.36736	1			0	IU/ml	TaqMan		15 IU/ml	37	U/l	37	34	1.08824	34	U/l	34	0.918919	19	U/l	19	71	U/l	71	8.2	KU/l	8.2	38
GTSJJL2HY	35	10.02.1979	34.6417	1	180	60	2	0	298000	IU/ml	298000	5.47422	164000	neg	IU/ml	0	neg	IU/ml	0	0	0	5.47422	1	0	1	neg	IU/ml	Amplicor		50 IU/ml	86	U/l	86	45	1.91111	57	U/l	57	0.662791	37	U/l	37	144	U/l	144	7987	KU/l	7.987	37
GV16KE2KX	35							0			481000	5.68215	481000			0			0	0	0	5.68215
GV38JRW8K	13	24.01.1980	33.6861	1	172	77	3	0	2410000	IU/ml	2410000	6.38202	933000	<25	IU/ml	14	neg	IU/ml	0	0	0	6.38202	1	0	1	neg	IU/ml	TaqMan		12-15 IU/ml	99	U/l	99	45	2.2	47	U/l	47	0.474747	24	U/l	24	63	U/l	63				41.4
gx8heg6yk	1	12.12.1990	22.8028	0	164	61	3	0	14900	IU/ml	14900	4.17319		neg.	IU/ml		neg	IU/ml	0	0		4.17319	1	0	1	neg	Kopien/ml	TaqMan		<15 IU/ml	50	U/l	50	34	1.47059	39	U/l	39	0.78	37	U/l	37	82	U/l	82	8.6	KU/l	8.6	46
gynq9n0g5	21	01.05.1954	59.4167	0	168	58	3	0	9210	IU/ml	9210	3.96426		sch. Pos.<12	IU/ml		< 12	IU/ml	12	1.07918		5.04344	1			< 12	IU/ml	Abbott Real Time PCR	Realtime Abbott	12 IU/ml	133	U/l	133	34	3.91176	140	U/l	140	1.05263	172	U/l	172	120	U/l	120				56
gyv4n1emx	94	03.05.1975	38.4111	0	172	60	3	0	865962	IU/ml	865962	5.9375			IU/ml	0															60	U/l	60	34	1.76471	70	U/l	70	1.16667	38	U/l	38	78	U/l	78				4.13
h0uwv90mw	94	14.07.1964	49.2139	1	170	96	3	0	1911322	IU/ml	1911322	6.28133		nd	IU/ml	0	neg. < 12	IU/ml	0	0	0	6.28133	1					Sonstiges	PCR	< 12 IU/ml	138	U/l	138	45	3.06667	56	U/l	56	0.405797	32	U/l	32	45	U/l	45	8.4	KU/l	8.4	4
h1jwyudf7	85	09.06.1966	47.3111	0	161	63	3	1	1100000	IU/ml	1100000	6.04139				0	< 10	IU/ml	10	1		7.04139	1	<10	1	<10	IU/ml	TaqMan		10 IU/ml	192	U/l	192	34	5.64706	262	U/l	262	1.36458	320	U/l	320	100	U/l	100				56.2
h3sxrc5ql	85	18.03.1963	50.5361	1	171	81	3	0	1700000	IU/ml	1700000	6.23045		< 10	IU/ml		< 10	IU/ml	10	1		7.23045	1	0	1	< 10	IU/ml	TaqMan		10 IU/ml				45						86	U/l	86	59	U/l	59				59.7
H49HM2VQA	47	11.06.1976	37.3056	1	175	72	2	0	14659	IU/ml	14659	4.1661																			52	U/l	52	45	1.15556	30	U/l	30	0.576923	26	U/l	26	65	U/l	65	7.5	KU/l	7.5
h4k0e45qn	36	20.07.1967	46.1972	0	168	72	3	0	5310000	IU/ml	5310000	6.72509	2710000	neg.	IU/ml	0		IU/ml					1	< 0,02	1	< 0,02	IU/ml	TaqMan		< 0,02	79	U/l	79	34	2.32353	46	U/l	46	0.582278	19	U/l	19	54	U/l	54
h6g1jm17x	85	15.08.1954	59.1278	1	171	73	2	0	1200000	IU/ml	1200000	6.07918		< 10	IU/ml		<10	IU/ml	10	1		7.07918	1	<10	1	<10	IU/ml	TaqMan		10	228	U/l	228	45	5.06667	156	U/l	156	0.684211	157	U/l	157	90	U/l	90				51.6
h7ntye0r9	95	01.06.1948	65.3333	1	170	77	2	0	28200	IU/ml	28200	4.45025		neg.	IU/ml								1	0	1	neg.	IU/ml	TaqMan		15 IU/ml	4.41	µmol/l	264.6	45	5.88	3.77	µmol/l	226.2	0.854875	3.91	µmol/l	234.6	1.73	µmol/	103.779
H7QDDVD65	47	23.04.1959	54.4389	1	187	83	2	0	16400000	IU/ml	16400000	7.21484	5640000	<25	IU/ml	21	1850	IU/ml	1850	3.26717		10.482									118	U/l	118	45	2.62222	58	U/l	58	0.491525	28	U/l	28	64	U/l	64	7.3	KU/l	7.3	52.8
hdefmvxen	33	01.12.1979	33.8333	0	176	64	3	0	287000	IU/ml	287000	5.45788		< 10	IU/ml		neg.	IU/ml	0	0		5.45788	1	0	1	< 10	IU/ml	TaqMan		< 10 IU/ml	946	U/l	946	34	27.8235	401	U/l	401	0.42389	523	U/l	523				9.24	KU/l	9.24	61.4
hgw3dtk4m	7	26.03.1959	54.5139	1	175	70	3	1	784000	IU/ml	784000	5.89432	287000	114	IU/ml	228	neg	IU/ml	0	0	0	5.89432	1	0	1	0	IU/ml	TaqMan		25 IU/ml	82	U/l	82	45	1.82222				0	24	U/l	24	83	U/l	83
hhgawnscy	44	06.02.1984	29.6528	0	168	56	3	1	7690377	IU/ml	7690377	6.88595	4320000	neg.	IU/ml	0	neg.	IU/ml	0	0	0	6.88595	1	0	1	neg.	IU/ml	TaqMan		< 25	27.5	U/l	27.5	34	0.808824	38.2	U/l	38.2	1.38909	12.7	U/l	12.7	47.4	U/l	47.4				33.7
hkphp1wky	148							0	110000	IU/ml	110000	5.04139	16300																		51	U/l	51			36	U/l	36	0.705882	69	U/l	69				9	KU/l	9	46
hktd12jtf	44	22.12.1979	33.775	1	185	83	3	0	nd					< 25	IU/ml	0							0					TaqMan		< 25	51.3	U/l	51.3	45	1.14	39.8	U/l	39.8	0.775828	31.7	U/l	31.7	62.9	U/l	62.9				42
HM8RSRPK4	13	16.05.1957	56.375	1	200	88	3	0	12900000	IU/ml	12900000	7.11059	2040000	120	IU/ml	25	neg	IU/ml	0	0	0	7.11059	1	0	1	neg	IU/ml	TaqMan		15 IU/ml	66	U/l	66	45	1.46667	41	U/l	41	0.621212	24	U/l	24	43	U/l	43				44.6
hmg1ts0pv	44	28.11.1983	29.8417	1	181	90	3	0	77270	IU/ml	77270	4.88801		neg.	IU/ml	0	200	IU/ml	200	2.30103	217	7.18904	1	0	1			TaqMan		< 25	80.8	U/l	80.8	45	1.79556	55.3	U/l	55.3	0.684406	32.9	U/l	32.9	51.2	U/l	51.2				42.5
HN94C9YKP	42	26.11.1955	57.8472	1	172	86	3	0	7000000	IU/ml	7000000	6.8451	5000000			170			0	0	0	6.8451									171	U/l	171	45	3.8	106	U/l	106	0.619883	95	U/l	95	72	U/l	72	7.643	KU/l	7.643	44
HNWF1KFR6	1	27.08.1989	24.0944	1	172	95	3	0	11000000	IU/ml	11000000	7.04139		<15	IU/ml		neg.	IU/ml	0	0		7.04139	1			neg.	IU/ml	TaqMan		<15 IU/ml	197	U/l	197	45	4.37778	81	U/l	81	0.411168	36	U/l	36	67	U/l	67	9.48	KU/l	9.48	45
hq3j8kfhr	44	02.11.1965	47.9139	1	176	79	2	0	14603937	IU/ml	14603937	7.16447		27.9	IU/ml	89	neg.	IU/ml	0	0	0	7.16447						TaqMan		< 25	216	U/l	216	45	4.8	113	U/l	113	0.523148	138	U/l	138	68.1	U/l	68.1				43.1
hqe44f098	1	01.08.1977	36.1667	1	175	84	2	0	2350000	IU/ml	2350000	6.37107		< 15	IU/ml		neg	IU/ml	0	0		6.37107	1	0	1	neg	IU/ml	TaqMan		<15	60	U/l	60	45	1.33333	31	U/l	31	0.516667	52	U/l	52	53	U/l	53	10.9	KU/l	10.9	45
hqtxggsux	36	23.06.1982	31.2722	0	165	74	3	0	17000	IU/ml	17000	4.23045		<0,02	IU/ml		<0,02	IU/ml	0	0	0	4.23045	1	0	1			TaqMan		< 0,02	40	U/l	40	34	1.17647	32	U/l	32	0.8	9	U/l	9	57	U/l	57
huk0e45qn	36	20.07.1967	46.1972	0	168	72	3	0	5310000	IU/ml	5310000	6.72509	2710000	neg.	IU/ml	0		IU/ml					1	< 0,02	1			TaqMan		<0,02	79	U/l	79	34	2.32353	46	U/l	46	0.582278	19	U/l	19	54	U/l	54
hwy3ykqtu	36	08.05.1988	25.3972	0	166	62	3	0	125000	IU/ml	125000	5.09691	140000	neg.	IU/ml	0	< 0,02	IU/ml	0	0	0	5.09691	1					TaqMan		<0,02	148	U/l	148	34	4.35294	62	U/l	62	0.418919	63	U/l	63	90	U/l	90
hxckh21qv	44	28.03.1953	60.5083	1	175	91	3	0	369000	IU/ml	369000	5.56703	4420000	57.7	Kopien/ml	14							1	0	1	pos.	IU/ml	TaqMan		< 25	98.4	U/l	98.4	45	2.18667	129	U/l	129	1.31098	405	U/l	405	83.1	U/l	83.1				41
hyled907j	36	05.08.1978	35.1556	1	180	85	3	0	3520000	IU/ml	3520000	6.54654		20	IU/ml		n.d						1	0	1	neg.	IU/ml	TaqMan		<0,02	100	U/l	100	45	2.22222	62	U/l	62	0.62	69	U/l	69	108	U/l	108
j1s4lvxky	36	27.06.1971	42.2611	1	184	92	3	0	3590	KIU/ml	3590000	6.55509	934000	<20	IU/ml	17	< 0,02	KIU/ml	0	0	0	6.55509	1	0.02	0	neg.	IU/ml	TaqMan		0,02 KIU/ml	69	U/l	69	45	1.53333	36	U/l	36	0.521739	71	U/l	71	70	U/l	70
J233UJ03R	85							0
j6cgqwphw	36	24.10.1963	49.9361	0	169	75	3	0	224000	IU/ml	224000	5.35025		<20	IU/ml	14	neg.	IU/ml	0	0	0	5.35025	1	0	1	neg	IU/ml	TaqMan		0,02 KIU/ml	36	U/l	36	34	1.05882	35	U/l	35	0.972222	42	U/l	42
j82yne9m2	17	07.03.1977	36.5667	1	186	119.2	3	0	465200	IU/ml	465200	5.66764		< NWG	IU/ml		< NWG	IU/ml	12	1.07918		6.74682	1	0	1	< NWG	IU/ml	Abbott Real Time PCR	Abbott Real Time PCR	< 12 - 50	86	U/l	86	45	1.91111	38	U/l	38	0.44186	24	U/l	24	77	U/l	77	8.504	KU/l	8.504	6.4
J830X1FHC	35	23.11.1979	33.8556	1	178	60	3	1	1490000	IU/ml	1490000	6.17319	2100000	neg	IU/ml	0	neg	IU/ml	0	0	0	6.17319	1	0	1	neg	IU/ml	Amplicor		50 IU/ml	209	U/l	209	45	4.64444	256	U/l	256	1.22488	352	U/l	352	75	U/l	75	6.2	KU/l	6.2	43
ja8dfn09q	17	06.06.1975	38.3194	1	177	83.8	3	0		IU/ml				< NWG	IU/ml		neg.	IU/ml	0	0			1	0	1	neg.	IU/ml	Abbott Real Time PCR	Abbott Realtime PCR	< 12 - 50	80	U/l	80	45	1.77778	38	U/l	38	0.475	55	U/l	55	37	U/l	37
jas3q3p2d	42	16.10.1974	38.9583	1		91	3	0	8000	IU/ml	8000	3.90309		< 25 neg.	IU/ml		nd	IU/ml					1	0	1	neg.	IU/ml	TaqMan		25 IU/ml	53	U/l	53	45	1.17778	23.8	U/l	23.8	0.449057	21	U/l	21	62	U/l	62	11.223	KU/l	11.223	4.5
javmpmwxw	17	06.01.1977	36.7361	1	170	61.2	3	0	268000	IU/ml	268000	5.42813		100	IU/ml													Sonstiges	PCR	< 12 - 50	183	U/l	183	45	4.06667	74	U/l	74	0.404372	40	U/l	40	76	U/l	76	8.684	KU/l	8.684	47.5
jcuqksp2k	33	27.09.1980	33.0111	0	160	52	3	0	27600000	IU/ml	27600000	7.44091		30	IU/ml																357	U/l	357	34	10.5	141	U/l	141	0.394958	20	U/l	20	35	U/l	35				6.3
JCYYDM6D7	21	29.03.1958	55.5056	0	157	62	3	0	2890892	IU/ml	2890892	6.46103		<12	IU/ml		<12	IU/ml	12	1.07918		7.54021	1	<12	1	<12	IU/ml	Sonstiges	PCR		53	U/l	53	34	1.55882	67	U/l	67	1.26415	50	U/l	50	157	U/l	157	7716	µkat/l	7.716	57.2
je88e2wny	17			0	163	65	3	1	114800	IU/ml	114800	5.05994		neg.	IU/ml		neg.	IU/ml	0	0		5.05994	0					Abbott Real Time PCR	Abbott Realtime PCR	< 12 - 50	65	U/l	65	34	1.91176	113	U/l	113	1.73846	35	U/l	35	66	U/l	66	9.121	KU/l	9.121	29.4
jen4jwj6x	5	07.07.1952	61.2333	1	176	94	2	0	430100	IU/ml	430100	5.63357	29300	< 15	IU/ml	0	< 15	IU/ml	0	0	0	5.63357	1	< 15	1	< 15	IU/ml	TaqMan		15 IU/ml	115	U/l	115	45	2.55556	59	U/l	59	0.513043	51	U/l	51	58	U/l	58
jetxt02av	36	01.07.1978	35.25	0	163	50	3	0	2500	IU/ml	2500	3.39794		< 0,02	IU/ml	0	nd		0	0	0	3.39794	1	0.02	0	0.02	IU/ml	TaqMan		0.02	31	U/l	31	34	0.911765	35	U/l	35	1.12903	16	U/l	16
JG18W7G2R	13	27.06.1968	45.2611	1	194	90	3	0	25300000	IU/ml	25300000	7.40312	8770000	42	IU/ml	50	neg	IU/ml	0	0	0	7.40312	1	0	1	neg	IU/ml	TaqMan		15 IU/ml	44	U/l	44	45	0.977778	54	U/l	54	1.22727	26	U/l	26	71	U/l	71
jh79h9aue	5	12.05.1987	26.3861	1	186	94	2	0	7092	IU/ml	7092	3.85077	12000	<15	IU/ml	0	<15	IU/ml	0	0	0	3.85077	1	<15	1	<15	IU/ml	TaqMan		<15	65	U/l	65	45	1.44444	34	U/l	34	0.523077	43	U/l	43	69	U/l	69				61.6
jk1rersfq	5	07.11.1978	34.9	1	187	78.2	3	0	1690000	IU/ml	1690000	6.22789	778000	<15	IU/ml	0	<15	IU/ml	0	0	0	6.22789	1	<15	1	<15	IU/ml	TaqMan		<15	243	U/l	243	45	5.4	221	U/l	221	0.909465	114	U/l	114	100	U/l	100	5.9	KU/l	5.9
jmdh4xnuk	22	06.04.1966	47.4861	0	170	53	3	0	461000	IU/ml	461000	5.6637		grenzw.	IU/ml		neg.	IU/ml	0	0		5.6637	1	0	1	neg	IU/ml	TaqMan		0,01 KIU/ml	16	U/l	16	34	0.470588	24	U/l	24	1.5	18	U/l	18	66	U/l	66	7.7	KU/l	7.7	62.1
JMT3GN0QL	7	18.02.1958	55.6194	0	172	133	3	0	153000	IU/ml	153000	5.18469	360000	0	IU/ml	0	0	IU/ml	0	0	0	5.18469	1	0	1	neg	IU/ml	TaqMan		<25 IU/ml	137	U/l	137	34	4.02941				0	80	U/l	80	111	U/l	111	9.192	KU/l	9.192
jp3vpn81f	22	11.05.1968	45.3889	1	186	72	3	0	607000	IU/ml	607000	5.78319		170	IU/ml		neg	IU/ml	0	0		5.78319	1	0	1	neg	IU/ml	TaqMan		0,01 KIU/ml	197	U/l	197	45	4.37778	81	U/l	81	0.411168	53	U/l	53	87	U/l	87	9.1	KU/l	9.1	57.3
jqdc80n0d	152	13.05.1972	41.3833	1	176	130	3	0	24000	IU/ml	24000	4.38021	27000	< 15	IU/ml	14	< 15	IU/ml	15	1.17609	15	5.5563	0					TaqMan		< 15 IU/ml	69	U/l	69	45	1.53333	36	U/l	36	0.521739	57	U/l	57	66	U/l	66	13.46	KU/l	13.46	39
jsrdqrqlc	1	17.02.1976	37.6222	1	183	128	3	0						< 15	IU/ml																265	U/l	265	45	5.88889	127	U/l	127	0.479245	78	U/l	78	111	U/l	111	6.74	KU/l	6.74	41
JSV8EAWXV	12							0			40000	4.60206	40000
jvmj48ghx	11	17.11.1974	38.8722	1	173	83	3	0	1168000	IU/ml	1168000	6.06744		247	IU/ml		<NWG	IU/ml	15	1.17609		7.24353	1	0	1	<NWG	IU/ml	TaqMan		15	51	U/l	51	45	1.13333	23	U/l	23	0.45098	77	U/l	77	86	U/l	86				39.5
JXMVLELPE	22	17.03.1964	49.5389	0	173	69	2	0		IU/ml				neg	IU/ml		neg	IU/ml	0	0			1	0	1	neg	IU/ml	TaqMan		0.01	36	U/l	36	34	1.05882	40	U/l	40	1.11111	11	U/l	11	71	U/l	71	7.5	KU/l	7.5
jxs3he5hf	44	02.09.1981	32.0806	0	170	61	3	0	737982	IU/ml	737982	5.86805	486000	< 0,125	IU/ml	0	neg.	IU/ml	0	0	0	5.86805	1	0	1	neg.	IU/ml	TaqMan		< 25 IU/ml	141	U/l	141	34	4.14706	82.4	U/l	82.4	0.584397	23.7	U/l	23.7	34.3	U/l	34.3				41.8
JY5A3KD5R	7	17.07.1953	60.2056	0	165	125	3	0	817000	IU/ml	817000	5.91222	1300000	800	IU/ml	800	neg	IU/ml	0	0	0	5.91222	0			0	IU/ml	TaqMan		25 IU/ml	128	U/l	128	34	3.76471				0	92	U/l	92	75	U/l	75	9737	KU/l	9.737	4.21
k0vjlms3r	44	22.11.1965	47.8583	1	180	96	3	0	3724882	IU/ml	3724882	6.57111		62.3	IU/ml		nd	IU/ml					1	< 25	1	1002858	IU/ml	TaqMan		< 25 IU/ml	148	U/l	148	45	3.28889	94.8	U/l	94.8	0.640541	51.8	U/l	51.8	62.7	U/l	62.7				46.5
k37pqedca	44	08.07.1964	49.2306	1	186	88		0	3410000	IU/ml	3410000	6.53275	597000	nd		0	neg.	IU/ml	0	0		6.53275	0					TaqMan		< 25	327	U/l	327	45	7.26667	222	U/l	222	0.678899	614	U/l	614	70.3	U/l	70.3				42.9
k3j375tqp	87	01.05.1966	47.4167	0	162	49.2	3	0	361000	IU/ml	361000	5.55751		neg.	IU/ml		neg.	IU/ml	0	0		5.55751	1								84	U/l	84	34	2.47059	90	U/l	90	1.07143	54	U/l	54	79	U/l	79	6	KU/l	6
k4d7e9mxh	85	09.06.1959	54.3111	1	176	76	3	0	650	IU/ml	650	2.81291		< 10	IU/ml	0	<10	IU/ml	0	0	0	2.81291	1	<10	1	<10	IU/ml	TaqMan		10	98	U/l	98	45	2.17778	80	U/l	80	0.816327	65	U/l	65	68	U/l	68				60.6
k55a0292y	44	16.10.1939	73.9583	0	160	80	2	0	4409300	IU/ml	4409300	6.64437	4150000	< 0,125	IU/ml	0	< 0,125	IU/ml	0	0	0	6.64437	1	0	1	neg.	IU/ml	TaqMan		< 25	157	U/l	157	34	4.61765	89.6	U/l	89.6	0.570701	42.5	U/l	42.5	65	U/l	65				37.6
K6352AHS1	21	12.05.1973	40.3861	1	176	95	3	0	179691	IU/ml	179691	5.25453	750000	33	IU/ml	460			0	0	0	5.25453									109	U/l	109	45	2.42222	83	U/l	83	0.761468	51	U/l	51	118	U/l	118	8052	KU/l	8.052	55.7
k6hl3k7yp	22	25.01.1969	44.6833	0	169	66	3	0	102000	IU/ml	102000	5.0086					neg.	IU/ml	0	0		5.0086	1	0	1	145000	IU/ml	TaqMan		ca. 0,01 KIU/ml	36	U/l	36	34	1.05882	30	U/l	30	0.833333	26	U/l	26	40	U/l	40	9	KU/l	9
k83tjcatd	7	06.12.1950	62.8194	1	183	104.5	2	0	125000	IU/ml	125000	5.09691	149000	<25	IU/ml	14	0	IU/ml	0	0	0	5.09691	1	0	1	0	IU/ml	TaqMan		<25	171	U/l	171	45	3.8				0	104	U/l	104	80	U/l	80				4.69
k8qv1hljn	44	20.05.1976	37.3639	1	172	70	3	0	129000		129000	5.11059	44900	neg.	IU/ml	0	neg.	IU/ml	0	0	0	5.11059	1	0	1	neg.	IU/ml	TaqMan		< 25	119	U/l	119	45	2.64444	68.3	U/l	68.3	0.57395	96.7	U/l	96.7	107	U/l	107				40.9
k97ksf03y	85	13.08.1987	26.1333	1	179	72	3	0	320000	IU/ml	320000	5.50515		< 10	IU/ml		< 10	IU/ml	10	1		6.50515	1	< 10	1			TaqMan		10 IU/ml	80	U/l	80	45	1.77778	55	U/l	55	0.6875	50	U/l	50	65	U/l	65				63.8
K9F6A2JH1	7	15.12.1983	29.7944	1	190	83	3	0	189000	IU/ml	189000	5.27646	140000	<15	IU/ml	14	0	IU/ml	0	0	0	5.27646	1	0	1						64	U/l	64	45	1.42222				0	32	U/l	32	42	U/l	42	7868	U/l	7.868
k9peutda2	22	07.08.1949	64.15	1	185	111.9	3	0	40000	IU/ml	40000	4.60206		50	IU/ml		neg.	IU/ml	0	0		4.60206	1	0	1	neg.	IU/ml	TaqMan		0,01 KIU/ml	138	U/l	138	45	3.06667	131	U/l	131	0.949275	137	U/l	137	91	U/l	91	9.6	KU/l	9.6	58
K9U0X29M0	13	12.05.1956	57.3861	0	169	63	3	0	6750000	IU/ml	6750000	6.8293	2580000	37400	IU/ml		10400	IU/ml	10400	4.01703	122000	10.8463	1	19900	0	6870000	IU/ml	TaqMan		15 IU/ml	115	U/l	115	34	3.38235	86	U/l	86	0.747826	122	U/l	122	94	U/l	94				46.3
kace81n84	44	29.01.1979	34.6722	1	178	72	3	0	2010204	IU/ml	2010204	6.30324	8990000	< 0,125	IU/ml	0							1	0	1	nd		TaqMan		< 25 IU/ml	365	U/l	365	45	8.11111	274	U/l	274	0.750685	263	U/l	263	101	U/l	101				41.7
kcw61vt2y	22	28.06.1955	58.2583	0	152	61.8	3	0	163	IU/ml	163	2.21219		neg.	IU/ml		neg.	IU/ml	0	0		2.21219	1	0	1	neg	IU/ml	TaqMan		ca. 0,01 KIU/ml	118	U/l	118	34	3.47059	77	U/l	77	0.652542	51	U/l	51	71	U/l	71				51.8
kdy17l8p2	85	06.10.1973	39.9861	1	180	99.3	2	0	1400000	IU/ml	1400000	6.14613		<10	IU/ml		< 10	IU/ml	10	1		7.14613	1			< 10	IU/ml	TaqMan		10 IU/ml				45						98	U/l	98	96	U/l	96				65.8
KFQP28DHY	13	30.09.1983	30.0028	1	180	77	2	0	209000	IU/ml	209000	5.32015	2440000	neg	IU/ml	0	neg	IU/ml	0	0	0	5.32015	1	0	1			TaqMan		15 IU/ml	69	U/l	69	45	1.53333	58	U/l	58	0.84058	35	U/l	35	114	U/l	114				44.7
kgclls4ga	135	11.07.1979	34.2222	1	166	80	3	0	19100	IU/ml	19100	4.28103																TaqMan		15 IU/ml Serum	91	U/l	91	45	2.02222	48	U/l	48	0.527473	64	U/l	64							4.98
KH33Y3F3P	47	26892	40.125	0	173	61	3	0			2200000	6.34242	2200000			0			0	0		6.34242		0	1	0		Amplicor		11			50	34	1.47059			38	0.76			19			42			5.9
kh5jy62ev	87			1	174	62	3	0	5260000	IU/ml	5260000	6.72099																			50	U/l	50	45	1.11111	44	U/l	44	0.88	21	U/l	21	58	U/l	58				4.2
kh6xs90l6	25	28.05.1981	32.3417	1	183	83	3	0	82381	IU/ml	82381	4.91583		33	IU/ml																128	U/l	128	45	2.84444	66	U/l	66	0.515625	188	U/l	188	43	U/l	43	9.2	KU/l	9.2
KHJ6WVDMR	21	05.01.1951	62.7389	0	160	55	3	0	146530	IU/ml	146530	5.16593	61200	positiv	IU/ml		<12	IU/ml	0	0	0	5.16593	1	<12	1	<12	IU/ml	Abbott Real Time PCR	Realtime Abott	<12	204	U/l	204	34	6	259	U/l	259	1.26961	43	U/l	43	235	U/l	235
khk7ltsvm	135	02.11.1978	34.9139	0	175	72	3	0	4832129	IU/ml	4832129	6.68414																TaqMan			50	U/l	50	34	1.47059	73	U/l	73	1.46	16	U/l	16							57.9
KHMX68KUD	35							0			96000	4.98227	96000			14			0	0	0	4.98227
kka9vrahx	87	26.04.1975	38.4306	1			3	0	max 24000	IU/ml	24000	4.38021																TaqMan	Roche AmpliPrep/Taqman		25	U/l	25	45	0.555556	27	U/l	27	1.08	16	U/l	16	46	U/l	46				51.9
kktkraf20	57	12.08.1961	52.1361	1	163	67.5	3	0	1900000	IU/ml	1900000	6.27875	505000	positiv	IU/ml	14	neg.	IU/ml	0	0		6.27875	1	0	1	neg.	IU/ml	TaqMan		< 15	125.5	U/l	125.5	45	2.78889	57.5	U/l	57.5	0.458167	39.8	U/l	39.8		U/l
km15tt1hq	85	24.04.1957	56.4361	0	160	87.7	2	0	3300000	IU/ml	3300000	6.51851	2020000	<10	IU/ml	0	< 10	IU/ml	10	1		7.51851	1	< 10	1	<10	IU/ml	TaqMan		< 10	39	U/l	39	34	1.14706	30	U/l	30	0.769231	20	U/l	20	96	U/l	96				60.4
kn6htfe55	135	30.09.1957	56.0028	1	175	78.5	3	0	446900	IU/ml	446900	5.65021			IU/ml			IU/ml	0	0	0	5.65021	1	0	1			TaqMan		43 IU/ml	55	U/l	55	45	1.22222	36	U/l	36	0.654545	128	U/l	128	38	U/l	38
ks83cxeh4	57	10.09.1983	30.0583	1	174	91		0	160000	IU/ml	160000	5.20412	417000	neg.	IU/ml	0															74.8	U/l	74.8	45	1.66222	37	U/l	37	0.494652	29.9	U/l	29.9	75.7	U/l	75.7				4.16
ktwf4alqk	7	15.01.1962	51.7111	1	173	71	3	0	182000	IU/ml	182000	5.26007	57600	0	IU/ml	0	0	IU/ml	0	0	0	5.26007	1	0	1	neg.	IU/ml	TaqMan		<25	88	U/l	88	45	1.95556				0	57	U/l	57	72	U/l	72	8.235	KU/l	8.235
kvak5cpes	57	25.12.1964	48.7667	1	181	75	2	0	2300000	IU/ml	2300000	6.36173		380	IU/ml			IU/ml					1	0	1			TaqMan		< 15	77.6	U/l	77.6	45	1.72444	50.7	U/l	50.7	0.653351	42.8	U/l	42.8
KWLEKG9KX	22	08.06.1984	29.3139	1	183	74	2	0	12500000	IU/ml	12500000	7.09691	26800000	1170	IU/ml	1500	neg	IU/ml	0	0		7.09691	1	0	1	709000	IU/ml	TaqMan		0.01	23	U/l	23	45	0.511111	16	U/l	16	0.695652	22	U/l	22	57	U/l	57	9.7	KU/l	9.7	61
KWTASSAUN	33	25.12.1983	29.7667	1	187	83	3	0	134000	IU/ml	134000	5.1271																			156	U/l	156	45	3.46667	60	U/l	60	0.384615	84	U/l	84				982	KU/l	0.982
kxpvmdp47	57	26.02.1959	54.5972	0	168	47	2	0	1500000	IU/ml	1500000	6.17609	1300000	84000	IU/ml								1					TaqMan		< 43 IU/ml	128	U/l	128	34	3.76471	115	U/l	115	0.898438	76.4	U/l	76.4	89.7	U/l	89.7
KXQKNPT8T	35	31.12.1961	51.7528	1	167	59	3	0	774000	IU/ml	774000	5.88874	76900	neg	IU/ml	0	neg	IU/ml	0	0	0	5.88874	1	0	1	neg	IU/ml	Amplicor		50 IU/ml	37	U/l	37	45	0.822222	21	U/l	21	0.567568	29	U/l	29							52
l06s2cgep	21	12.04.1983	30.4694	1	188	90	3	0	6500000	IU/ml	6500000	6.81291		< 12	IU/ml	0	< 12	IU/ml	0	0	0	6.81291	1	< 12	1	< 12	IU/ml	Abbott Real Time PCR	Real Time Abbott	< 12 IU/ml	33	U/l	33	45	0.733333	60	U/l	60	1.81818	17	U/l	17	47	U/l	47				63
l0nd8syvp	67	28.03.1963	50.5083	1	164	70.5	3	0	4208000	IU/ml	4208000	6.62408		nd	IU/ml	0	nd		0	0	0	6.62408	1	< 15	1	< 15	IU/ml	TaqMan		< 15 IU/ml	94	U/l	94	45	2.08889	61	U/l	61	0.648936	77	U/l	77	68	U/l	68	6.3	KU/l	6.3
l0rmf015u	30	25.10.1955	57.9333	1	169	67.5	2	0	20000	IU/ml	20000	4.30103																			148	U/l	148	45	3.28889	133	U/l	133	0.898649	866	U/l	866	72	U/l	72	5.88	KU/l	5.88	43
l202s7ppy	21	03.12.1971	41.8278	0	164	57	3	0	1300000	IU/ml	1300000	6.11394		270	IU/ml	406	< 12	IU/ml	12	1.07918		7.19312	1	< 12	1	< 12	IU/ml	Abbott Real Time PCR	RealTime Abbott	< 12 U/l	39	U/l	39	34	1.14706	37	U/l	37	0.948718	20	U/l	20	47	U/l	47	9567	U/l	9.567	59.7
l24q11d8v	16	09.09.1977	36.0611	1	178	81	3	0	640000	IU/ml	640000	5.80618	817000										0					TaqMan		< 15	59.3	U/l	59.3	45	1.31778	30.1	U/l	30.1	0.507589	80.9	U/l	80.9	66	U/l	66	9.288	KU/l	9.288	43.6
l2e5pcxqk	21	30.06.1961	52.2528	1	180	80	3	0	869760	IU/ml	869760	5.9394		Schwachpositiv	IU/ml	14	< 12	IU/ml	0	0	0	5.9394	1	< 12	1	< 12	IU/ml	Abbott Real Time PCR	Real Time Abbott	< 12 IU/ml	83	U/l	83	45	1.84444	105	U/l	105	1.26506	36	U/l	36	103	U/l	103				60.6
L33YYK8U9	21	30.09.1982	31.0028	0	179	77	2	0	143980	IU/ml	143980	5.1583	740000	pos.	IU/ml	0															17	U/l	17	34	0.5	16	U/l	16	0.941176	11	U/l	11	47	U/l	47	5198	KU/l	5.198	63.3
l348d9xhj	21	13.04.1978	35.4667	1	182	83.7	3	0	850	IU/ml	850	2.92942		< 12	IU/ml	0	< 12	IU/ml	0	0	0	2.92942	1	< 12	1	< 12	IU/ml	Abbott Real Time PCR	RealTime Abbott	< 12 IU/l	19	U/l	19	45	0.422222	25	U/l	25	1.31579	17	U/l	17	73	U/l	73	4788	U/l	4.788	59.3
l6a0kg8p6	28	15.06.1981	32.2944	1	180	95	3	0	4750*10^3	IU/ml	4750000	6.67669	251000	neg	IU/ml	0		IU/ml	0	0	0	6.67669	1	0	1	neg	IU/ml	TaqMan		<15	321	U/l	321	45	7.13333	129	U/l	129	0.401869	120	U/l	120	96	U/l	96
l7gdr511u	42	28.10.1956	56.925	1	163	66	3	0	1800000	IU/ml	1800000	6.25527		81000	IU/ml		180	IU/ml	180	2.25527		8.51055	0								119	U/l	119	45	2.64444	170	U/l	170	1.42857	147	U/l	147	120	U/l	120	2.117	KU/l	2.117	3.9
L7NMRGVWQ	42	15.07.1965	48.2111	1	167	79	2	0	1600000	IU/ml	1600000	6.20412				0			0	0	0	6.20412									29	U/l	29	45	0.644444	29	U/l	29	1	18	U/l	18	49	U/l	49	10.175	KU/l	10.175	4.6
lalgyp2k4	42	05.01.1977	36.7389	1	182	78.3	3	0	510000	IU/ml	510000	5.70757																			31.5	U/l	31.5	45	0.7	55.7	U/l	55.7	1.76825	29	U/l	29	79	U/l	79	10.036	KU/l	10.036	4.7
lf3pa0469	33	28.07.1974	39.175	0	172	65	3	0	120000	IU/ml	120000	5.07918		40	IU/ml		< 10	IU/ml	10	1		6.07918	1	< 10	1			TaqMan		< 10	64	U/l	64	34	1.88235	41	U/l	41	0.640625	62	U/l	62
lfddsr35t	22	10.08.1971	42.1417	0	172	60	3	0	11300	IU/ml	11300	4.05308	0			0	neg	IU/ml	0	0	0	4.05308	1	0	1	neg	IU/ml	TaqMan		0,01 KUI/ml	86	U/l	86	34	2.52941	48	U/l	48	0.55814	15	U/l	15	48	U/l	48	9.3	KU/l	9.3	55.2
lg6hayvf0	57	03.02.1979	34.6611	0	156	65	3	0	470000	IU/ml	470000	5.6721		neg.	IU/ml	0	neg.	IU/ml	0	0		5.6721	1	0	1			TaqMan		< 15	28.4	U/l	28.4	34	0.835294	22.4	U/l	22.4	0.788732	23.2	U/l	23.2	56.9	U/l	56.9
lg9n92pdu	47	03.10.1956	56.9944	1	176	90	3	1	6610000	IU/ml	6610000	6.8202											0					TaqMan		< 20 IU/ml	75	U/l	75	45	1.66667	65	U/l	65	0.866667	156	U/l	156	81	U/l	81
lgfdlgk5j	33	18.08.1985	28.1194	1	184	81	3	0	77500	IU/ml	77500	4.8893		neg.<10	IU/ml		10	IU/ml	10	1		5.8893									89	U/l	89	45	1.97778	39	U/l	39	0.438202	22	U/l	22				10.6	KU/l	10.6
lgsdlgk5y	33	18.08.1985	28.1194	1	184	81	3	0	77500	IU/ml	77500	4.8893		neg. < 10	IU/ml		< 10	IU/ml	10	1		5.8893	0					TaqMan		< 10 IU/ml	89	U/l	89	45	1.97778	39	U/l	39	0.438202	22	U/l	22				10.6	KU/l	10.6
lhcpsmarx	57	28.12.1968	44.7583	1	187	105	3	0	77000	IU/ml	77000	4.88649	1040000	pos.	IU/ml	0	neg.	IU/ml	0	0	0	4.88649	1					TaqMan		< 15	79	U/l	79	45	1.75556	138	U/l	138	1.74684	73.3	U/l	73.3	66.2	U/l	66.2
lhxh8uqrp	47	14.04.1981	32.4639	1	183	76	3	0	76	IU/ml	76	1.88081	15	< 20	IU/ml	0							0					TaqMan		< 20 IU/ml	37	U/l	37	45	0.822222	30	U/l	30	0.810811	24	U/l	24	58	U/l	58
lls7mlcre	57	01.10.1977	36	0	160	83	3	0	280000	IU/ml	280000	5.44716	38600	neg.	IU/ml	0							0					TaqMan		< 15 IU/ml	67.7	U/l	67.7	34	1.99118	40.2	U/l	40.2	0.593796	43	U/l	43	74.8	U/l	74.8				4.01
lnphnredr	57	31.08.1971	42.0861	0	176	75	3	0	19000	IU/ml	19000	4.27875	5220	neg.	IU/ml		neg.	IU/ml	0	0		4.27875	1	0	1	neg.	IU/ml	TaqMan		< 15	244	U/l	244	34	7.17647	278	U/l	278	1.13934	483	U/l	483	120	U/l	120
LTF439TTM	47	14.11.1984	28.8806	1	183	76	2	0	169000	IU/ml	169000	5.22789	216000	100	IU/ml	205	<20	IU/ml	20	1.30103		6.52892	1	0	1			TaqMan		20 IU/ml	63	U/l	63	45	1.4	29	U/l	29	0.460317	33	U/l	33	90	U/l	90	14.8	KU/l	14.8	61.4
M71YTW0WJ	13	02.05.1963	50.4139	0	160	62	3	0	229000	IU/ml	229000	5.35984	22300	2360	IU/ml	992	neg.	IU/ml	0	0	0	5.35984	1	0	1	neg	IU/ml				39	U/l	39	34	1.14706	24	U/l	24	0.615385	18	U/l	18	103	U/l	103				41.6
m770wmxxr	30	05.07.1986	27.2389	1	175	90	2	0																										45
M7UV9DU0W	21	24.02.1972	41.6028	1	176	95	2	0	14893145	IU/ml	14893145	7.17299	15000000	neg	IU/ml	0	<12	IU/ml	0	0	0	7.17299						Abbott Real Time PCR	Realtime Abbott	<12 IU	54	U/l	54	45	1.2	44	U/l	44	0.814815	38	U/l	38	113	U/l	113	9.81	KU/l	9.81	58.7
m88wdv0jr	1	17.06.1971	42.2889	0	159	49	3	0	1780000	IU/ml	1780000	6.25042		neg.	IU/ml		neg.	IU/ml	0	0		6.25042	1	0	1	neg.	IU/ml	TaqMan		< 15 IU/ml	109	U/l	109	34	3.20588	56	U/l	56	0.513761	19	U/l	19	46	U/l	46	8.02	KU/l	8.02	39
m8d46ls2y	85	02.11.1973	39.9139	1	171	60		0	1700000	IU/ml	1700000	6.23045			IU/ml		< 10	IU/ml	10	1		7.23045	1	<10	1	< 10	IU/ml	TaqMan		< 10 IU/ml	146	U/l	146	45	3.24444	66	U/l	66	0.452055	28	U/l	28	45	U/l	45				70.7
ma97k60ty	152	18.11.1970	42.8694	1	184	105	3	0	2600000	IU/ml	2600000	6.41497	6040000	< 15	IU/ml	14	< 15	IU/ml	15	1.17609	15	7.59106	1	< 15	1	< 15	IU/ml	Amplicor		< 15	139	U/l	139	45	3.08889	60	U/l	60	0.431655	51	U/l	51	45	U/l	45	7.73	KU/l	7.73	45
mc1auh7sd	85	13.03.1972	41.55	1	183	88	3	0	240000	IU/ml	240000	5.38021		<10	IU/ml		< 10	IU/ml	10	1		6.38021	1	< 10	1	< 10	IU/ml	TaqMan		10 IU/ml				45						60	U/l	60	46	U/l	46				60
mcxv0c68v	152	15.10.1972	40.9611	1	170	73	2	1	2000000	IU/ml	2000000	6.30103	1920000	< 15	IU/ml		nd						0			< 15	IU/ml	TaqMan		< 15	163	U/l	163	45	3.62222	58	U/l	58	0.355828	88	U/l	88	101	U/l	101	12.32	KU/l	12.32	38
mhht6hr65	21	04.04.1978	35.4917	1	178	80	3	0	3233789	IU/ml	3233789	6.50971		< 12	IU/ml		<12	IU/ml	12	1.07918		7.58889	1	<12	1	<12	IU/ml	TaqMan		<12	313	U/l	313	45	6.95556	131	U/l	131	0.41853	42	U/l	42	64	U/l	64
mjtxm467p	152	15.11.1961	51.8778	0	165	54.5	3	0	130000	IU/ml	130000	5.11394		18	IU/ml								0					TaqMan		< 15 IU/ml	53	U/l	53	34	1.55882	37	U/l	37	0.698113	34	U/l	34	62	U/l	62	9.7	KU/l	9.7	41
ml0v585rq	1	03.04.1976	37.4944	1	167	70	3	0	2450000	IU/ml	2450000	6.38917		neg.	IU/ml		neg.	IU/ml	0	0		6.38917	1	0	1	neg.	IU/ml	TaqMan		< 15 IU/ml	209	U/l	209	45	4.64444	92	U/l	92	0.440191	40	U/l	40	70	U/l	70	7.45	KU/l	7.45	47
ml1s1r5mn	152	25.02.1963	50.6	0	160	65	3	0	4700000	IU/ml	4700000	6.6721		530	IU/ml								1	< 15	1	< 15	IU/ml	TaqMan		< 15 IU/ml	128	U/l	128	34	3.76471	62	U/l	62	0.484375	98	U/l	98	102	U/l	102	10.93	KU/l	10.93	38
mm5wjauqj	1	05.12.1974	38.8222	0	175	59	3	0	189000	IU/ml	189000	5.27646		1350	IU/ml			IU/ml					1					TaqMan		< 15 IU/ml	61	U/l	61	34	1.79412	39	U/l	39	0.639344	75	U/l	75	64	U/l	64	12.04	KU/l	12.04	44
MM8CYW9E9	42	27.08.1964	49.0944	0	171	61	3	0	2100000	IU/ml	2100000	6.32222	780000	410	IU/ml	320	neg	IU/ml	0	0	0	6.32222		0	1	<25		TaqMan		25 IU/ml	35.5	U/l	35.5	34	1.04412	32.2	U/l	32.2	0.907042	19.8	U/l	19.8	45	U/l	45	7.517	KU/l	7.517	4.2
mm9k3s06g	25	07.04.1980	33.4833	0	165	60	3	0	2199614	IU/ml	2199614	6.34235		< 12	IU/ml																33	U/l	33	34	0.970588	28	U/l	28	0.848485	20	U/l	20	37	U/l	37	8.1	KU/l	8.1	57.8
MQL7KFCQY	12	04.12.1976	36.825	1		80	3	0	829000	IU/ml	829000	5.91855	4570000	0	IU/ml	0							0					TaqMan		15 UI/ml	170	U/l	170	45	3.77778	81	U/l	81	0.476471	29	U/l	29
mqxaac8km	1	17.07.1965	48.2056	0	163	62	3	0	729000	IU/ml	729000	5.86273		< 15	IU/ml		neg	IU/ml	0	0	0	5.86273	1	0	1		IU/ml	TaqMan		<15	223	U/l	223	34	6.55882	123	U/l	123	0.55157	57	U/l	57	60	U/l	60	7.23	KU/l	7.23	40
mtet1dp0c	1			1	185	105	2	0	2070000	IU/ml	2070000	6.31597		neg.	IU/ml		neg.	IU/ml	0	0		6.31597	1	0	1	neg.	IU/ml	TaqMan		< 15 IU/ml	113	U/l	113	45	2.51111	38	U/l	38	0.336283	41	U/l	41	103	U/l	103	8.57	KU/l	8.57	46
mtk0r3qlr	25	14.11.1978	34.8806	1	178	63.4		0	70221	IU/ml	70221	4.84647		neg.	IU/ml								0								133	U/l	133	45	2.95556	71	U/l	71	0.533835	39	U/l	39	66	U/l	66				50.8
MUAYARSN6	1	09.09.1979	34.0611	1	175	68	3	0	390000	IU/ml	390000	5.59106		neg	IU/ml																84	U/l	84	45	1.86667	53	U/l	53	0.630952	43	U/l	43	73	U/l	73	7.36	KU/l	7.36	39
mv603st9m	18	05.10.1975	37.9889	0	155	52	3	0						neg.	IU/ml																0.43	µmol/sl	25.8	34	0.758824	0.4	µmol/sl	24	0.930233	0.3	µmol/sl	18	0.83	µmol/sl	49.8				43.9
mv7cg3nka	36	16.11.1954	58.875	1	170	88	3	0	555000	IU/ml	555000	5.74429	104000			125	0.02	KIU/ml	0	0	0	5.74429	1	0.02	0	neg.	IU/ml	TaqMan		< 0,02 KIU/ml	169	U/l	169	45	3.75556	96	U/l	96	0.568047	68	U/l	68	60	U/l	60
mwv9mktwg	36	14.10.1961	51.9639	0	162	74	3	0	197000	IU/ml	197000	5.29447		nd	IU/ml	0	10800	IU/ml	10800	4.03342	13600	9.32789	1	0.02	0	0.02	IU/ml	TaqMan		< 0,02	52	U/l	52	34	1.52941	45	U/l	45	0.865385	52	U/l	52	89	U/l	89
myhkn0a91	1	28.08.1968	45.0917	1	176	84	3	1	2180000	IU/ml	2180000	6.33846		17	IU/ml		neg.	IU/ml	0	0		6.33846	1	0	1			TaqMan		< 15 IU/ml	146	U/l	146	45	3.24444	106	U/l	106	0.726027	106	U/l	106	113	U/l	113	5.93	KU/l	5.93	37
myvvgx0qp	33	20.04.1978	35.4472	1	178	95	3	1			6510000	6.81358	6510000																		392	U/l	392	45	8.71111	216	U/l	216	0.55102	157	U/l	157				10.74	KU/l	10.74	61.2
mywmvh2hf	42	25.01.1952	61.6833	1	170	72	2	0	29000000	IU/ml	29000000	7.4624	28600000	bd		1610	<25	IU/ml	0	0	0	7.4624	1	0	1	54000000	IU/ml	TaqMan		25 IU/ml	26	U/l	26	45	0.577778	33	U/l	33	1.26923	13	U/l	13	60	U/l	60	8.212	KU/l	8.212	5
n0svrl1jk	43	09.03.1972	41.5611	0	164	80.5	3	1	11000	IU/ml	11000	4.04139		< 100	IU/ml		nd						1	0	1	neg.	IU/ml	TaqMan		< 43 IU/ml	0.81	µmol/sl	48.6	34	1.42941	1.1	µmol/sl	66	1.35802	2.57	µmol/sl	154.2	2.19	µmol/sl	131.4				34.9
n10tjqqyr	33	06.10.1957	55.9861	1	173	85.5	2	0		IU/ml				70	IU/ml		< 10	IU/ml	10	1			1	< 10	1			TaqMan		<10 U/l	501	U/l	501	45	11.1333	205	U/l	205	0.409182	358	U/l	358
n19cv2evn	85	09.11.1961	51.8944	1	176	90.4	2	0	4700000	IU/ml	4700000	6.6721		pos. < 10	IU/ml		<10	IU/ml	10	1		7.6721	1	<10	1	neg	IU/ml				265	U/l	265	45	5.88889	110	U/l	110	0.415094	91	U/l	91	66	U/l	66				60.9
n5cu7g050	44	11.02.1972	41.6389	1	178	71	3	0	47931	IU/ml	47931	4.68062	782000	< 15	IU/ml	160	neg	IU/ml	0	0	0	4.68062	1	0	1			TaqMan		< 15	135	U/l	135	45	3	139	U/l	139	1.02963	196	U/l	196	75	U/l	75				41.6
n6358lp3x	18	13.12.1981	31.8	1	175	65	3	0	301145	IU/ml	301145	5.47878		<25	IU/ml		neg.	IU/ml	0	0		5.47878	1	0	1			TaqMan		<25 IU/ml	1.13	µmol/sl	67.8	45	1.50667	0.72	µmol/sl	43.2	0.637168	0.49	µmol/sl	29.4	0.94	µmol/sl	56.4				48.5
N66G2GLVE	13							0
n6srmktww	5	21.08.1965	48.1111	1	185	93.3	3	0	6532000	IU/ml	6532000	6.81505		1482	IU/ml		< 15	IU/ml	0	0	0	6.81505	1	< 15	1	38930	IU/ml	TaqMan		15 IU/ml	219	U/l	219	45	4.86667	183	U/l	183	0.835616	70	U/l	70	50	U/l	50
n8ert0q05	18	02.03.1957	56.5806	0	168	70	2	0	4399354	IU/ml	4399354	6.64339		169	IU/ml		neg.	IU/ml	0	0		6.64339	1	0	1			TaqMan		<25 IU/ml	0.84	µmol/sl	50.4	34	1.48235	0.7	µmol/sl	42	0.833333	0.29	µmol/sl	17.4	1.01	µmol/sl	60.6				44.1
n91mtfm8n	85	12.07.1967	46.2194	1	170	83	2	0	2300000	IU/ml	2300000	6.36173		< 10	IU/ml		<10	IU/ml	10	1		7.36173	1	<10	1	<10	IU/ml	TaqMan		<10	47	U/l	47	45	1.04444	43	U/l	43	0.914894	28	U/l	28	75	U/l	75				65.4
nd0r0g0mr	18	05.08.1975	38.1556	1	186	90	3	0	20531	IU/ml	20531	4.31241		neg.	IU/ml													TaqMan		<25 IU/ml	1.28	µmol/sl	76.8	45	1.70667	0.63	µmol/sl	37.8	0.492188	0.71	µmol/sl	42.6	0.92	µmol/sl	55.2
nd4pcvakh	85	22.01.1944	69.6917	0	162	74	2	0	1600000	IU/ml	1600000	6.20412		pos. > 10	IU/ml	14	< 10	IU/ml	0	0	0	6.20412	1	<10	1	neg.	IU/ml				139	U/l	139	34	4.08824	82	U/l	82	0.589928	27	U/l	27	64	U/l	64				55.8
neqlyenr9	85	19.08.1970	43.1167	0	169	59	2	0	6600	IU/ml	6600	3.81954		< 10	IU/ml		< 10	IU/ml	10	1		4.81954	1	<10	1	<10	IU/ml	TaqMan		10 IU/ml	14	U/l	14	34	0.411765	17	U/l	17	1.21429	13	U/l	13	50	U/l	50				62.2
nfgv071xa	20	25.09.1977	36.0167	1	175	65	3	0																										45
nhep9082q	1	22.05.1969	44.3583	0	170	79	3	0	419000	IU/ml	419000	5.62221		<15	IU/ml		neg.	IU/ml	0	0		5.62221	0					TaqMan		<15.0 IE/ml	60	U/l	60	34	1.76471	40	U/l	40	0.666667	30	U/l	30	57	U/l	57	7.57	KU/l	7.57	39
nj1lc369p	11	19.02.1976	37.6167	1	176	75	3	0	460	IU/ml	460	2.66276	33	< NWG	IU/ml	0			0	0	0	2.66276									13	U/l	13	45	0.288889	13	U/l	13	1	20	U/l	20
njctjn1cp	126	28.09.1963	50.0083	1	170	100	3	0	29000	IU/ml	29000	4.4624				0	n.d.	IU/ml	0	0	0	4.4624	1	< 10	1	< 10	IU/ml	Sonstiges	PCR	< 10 IU/ml bis 69 Mio. IU/ml	90	U/l	90	45	2	63	U/l	63	0.7	89	U/l	89
NN031YSPV	21	20.06.1993	20.2806	0	167	63	3	0	165015	IU/ml	165015	5.21752	210000	pos.	IU/ml	0															32	U/l	32	34	0.941176	22	U/l	22	0.6875	11	U/l	11	63	U/l	63	8.162	KU/l	8.162	55.8
nna2mf2l0	126	22.11.1977	35.8583	1	178	100	3	0	13000	IU/ml	13000	4.11394		n.d.			n.d.	IU/ml	0	0	0	4.11394	1			< 10	IU/ml	Sonstiges	PCR	< 10 IU/ml bis 69 Mio. IU/ml	115	U/l	115	45	2.55556	77	U/l	77	0.669565	53	U/l	53
nngkqtrqa	85	15.04.1941	72.4611	1	170	88	3	0	2600000	IU/ml	2600000	6.41497																			551	U/l	551	45	12.2444	285	U/l	285	0.517241	68	U/l	68	48	U/l	48				58.3
nq993681v	1	04.05.1956	57.4083	0	165	157	3	0	123000	IU/ml	123000	5.08991			IU/ml		neg.	IU/ml	0	0		5.08991	1	0	1	neg.	IU/ml	TaqMan		< 15 IU/ml	74	U/l	74	34	2.17647	39	U/l	39	0.527027	92	U/l	92	54	U/l	54	11.8	KU/l	11.8	37
ns2me8la7	42	31.03.1956	57.5028	1	181	98	3	0	6000000	IU/ml	6000000	6.77815		60	IU/ml		neg.	IU/ml	0	0		6.77815	1	0	1	neg.	IU/ml	TaqMan		< 25	72.3	U/l	72.3	45	1.60667	41.9	U/l	41.9	0.57953	55	U/l	55	95	U/l	95	9.779	KU/l	9.779	4.5
nufeeqhux	42	24.07.1969	44.1861	1	176	70	3	0	1700000	IU/ml	1700000	6.23045		neg. < 25	IU/ml		nd						1	0	1	neg	IU/ml	TaqMan		< 25	84	U/l	84	45	1.86667	61.5	U/l	61.5	0.732143	87	U/l	87	87	U/l	87	8.854	KU/l	8.854	4.9
nv5fqs7gs	25	01.06.1959	54.3333	1	176	87.7	3	0	48706	IU/ml	48706	4.68758		14	IU/ml																44	U/l	44	45	0.977778	39	U/l	39	0.886364	30	U/l	30	65	U/l	65	9.5	KU/l	9.5	54.5
nvwcxl0aq	42	27.12.1971	41.7611	1	174	75	3	0	15000000	IU/ml	15000000	7.17609		neg. < 25	IU/ml		neg. < 25	IU/ml	25	1.39794		8.57403	1	0	1	neg.	IU/ml	TaqMan		25 IU/ml	56.4	U/l	56.4	45	1.25333	137.8	U/l	137.8	2.44326	21	U/l	21	51	U/l	51	7.918	KU/l	7.918	4.4
nw21yp2tk	148	02.08.1966	47.1639	0	163	92	2	0	3400000	IU/ml	3400000	6.53148	547000	pos. < 10	IU/ml	14	neg.	IU/ml	0	0	0	6.53148	1	< 10	1			TaqMan		< 10 IU/ml	51	U/l	51	34	1.5	39	U/l	39	0.764706	17	U/l	17	83	U/l	83	7.2	KU/l	7.2	44
nxhps5vkp	148	02.07.1970	43.2472	1	172	74	3	0	4400000	IU/ml	4400000	6.64345		<10	IU/ml	14	<10	IU/ml	0	0	0	6.64345	1	< 10	1			TaqMan		10 IU/ml	113	U/l	113	45	2.51111	50	U/l	50	0.442478	51	U/l	51	101	U/l	101	8.8	KU/l	8.8	65.2
p0ma3g33k	148	12.07.1959	54.2194	1	164	65	2	0	1600000	IU/ml	1600000	6.20412	465000	<10	IU/ml	465000	< 10	IU/ml	0	0	0	6.20412	1	< 10	1			TaqMan		10 IU/ml	53	U/l	53	45	1.17778	33	U/l	33	0.622642	25	U/l	25	55	U/l	55
P1V1PLEJ5	35							0			4000	3.60206	4000			0			0	0	0	3.60206
P1WPR7PG0	11	22.08.1978	35.1083	1	175	90	3	0	111872	IU/ml	111872	5.04872	328000	<15	IU/ml	14							0					TaqMan		<15	127	U/l	127	45	2.82222	66	U/l	66	0.519685	29	U/l	29	79	U/l	79
p2a3u6kqj	90	04.01.1974	39.7417	0	163	52	3	0	15000	IU/ml	15000	4.17609	15000	neg.	IU/ml		neg.	IU/ml	0	0	0	4.17609	1	0	1	< 10	IU/ml	TaqMan	Taqman quant./ Amplicor qual	40 IU/ml	92	U/l	92	34	2.70588	57	U/l	57	0.619565	32	U/l	32	43	U/l	43	6.5	KU/l	6.5	45.9
p2y6gy0gy	90	04.01.1966	47.7417	0	170	61	3	0		IU/ml	731000	5.86392	731000		IU/ml	0		IU/ml	0	0	0	5.86392	1	< 10	1	< 10	IU/ml	Sonstiges	PCR	40 IU/ml	46	U/l	46	34	1.35294	34	U/l	34	0.73913	20	U/l	20	56	U/l	56	7.6	KU/l	7.6	48.5
P45SVWML2	17	09.03.1971	42.5611	1	185	90	3	0	2650752	IU/ml	2650752	6.42337	760000	12	IU/ml	0	neg	IU/ml	0	0	0	6.42337									54	U/l	54	45	1.2	39	U/l	39	0.722222	67	U/l	67	105	U/l	105
P4A1599UR	44	10.11.1971	41.8917	0	159	61	3	0	396000	IU/ml	396000	5.5977	770000																		32	U/l	32	34	0.941176	44	U/l	44	1.375	114	U/l	114	79	U/l	79				41
p4d4x8t94	10	28.10.1961	51.925	1	182	94	3	0	200000	IU/ml	200000	5.30103		15	IU/ml	0															267	U/l	267	45	5.93333	140	U/l	140	0.524345	76	U/l	76	102	U/l	102	8.4	U/l	8.4	43
P4LHEG443	47							0			190000	5.27875	190000
P4N61USDS	47	29414	33.2194	1	178	80	2	0			600000	5.77815	600000						0	0		5.77815				0		TaqMan		20			64	45	1.42222			52	0.8125			32			84
p5pfmagqw	10	28.05.1976	37.3417	1	186	90	3	0		IU/ml																					151	U/l	151	45	3.35556	67	U/l	67	0.443709	52	U/l	52	54	U/l	54	10.52	U/l	10.52	48
p7k9jv498	21	12.03.1952	61.5528	0	156	70	3	1	149660	IU/ml	149660	5.17511		1240	IU/ml		< 12	IU/ml	12	1.07918		6.25429	1	schwach pos.	0	25870	IU/ml	Abbott Real Time PCR	Abbott Real Time PCR	< 12 IU/ml	156	U/l	156	34	4.58824	242	U/l	242	1.55128	107	U/l	107	105	U/l	105
p7m3uvvj5	42			0	176	85	3	0	450000	IU/ml	450000	5.65321		pos. < 25	IU/ml		nd		15	1.17609	15	6.8293	1	0	1	<25	IU/ml	TaqMan		<25	52	U/l	52	34	1.52941	44	U/l	44	0.846154	29	U/l	29	82	U/l	82	11.202	KU/l	11.202	4.9
p8eqa50va	92	05.03.1979	34.5722	1	183	81.8	3	0	3884000	IU/ml	3884000	6.58928	75900	< 30	IU/ml																1.22	µmol/ls	73.2	45	1.62667	0.84	µmol/ls	50.4	0.688525	0.3	µmol/ls	18	0.75	µmol/ls	45	154	µmol/ls	9.24	63.7
p8g65c73a	41	05.05.1972	41.4056	1	176	92	3	0						nd			neg.	IU/ml	0	0			1	0	1	neg.	IU/ml				98	U/l	98	45	2.17778	60	U/l	60	0.612245	38	U/l	38	82	U/l	82	11.582	KU/l	11.582	49.7
p8uhu52ng	42	15.02.1974	39.6278	0	174	129	2	0		IU/ml				< 25 pos.	IU/ml		neg.	IU/ml	0	0			1	<25	1	<25	IU/ml	TaqMan		<25	122	U/l	122	34	3.58824	55	U/l	55	0.45082	4	U/l	4	65	U/l	65	6.595	KU/l	6.595	4.4
P8WJS18KS	21	31.03.1975	38.5028	1	172	88	3	0	12923	IU/ml	12923	4.11136	180000	<12	IU/ml	0	neg	IU/ml	0	0	0	4.11136	1	<12	1	<12	IU/ml	TaqMan		<12	163	U/l	163	45	3.62222	58	U/l	58	0.355828	35	U/l	35	64	U/l	64	88.7	KU/l		59.3
pafhgpxn2	41	04.12.1971	41.825	1	184	95	3	0		IU/ml	1040000	6.01703	1040000	neg.	IU/ml	0	neg.	IU/ml	0	0	0	6.01703	1	0	1	neg.	IU/ml	Abbott Real Time PCR	PCR Abbott	30 IU/ml	235	U/l	235	45	5.22222	176	U/l	176	0.748936				54	U/l	54				50
pcey8yvft	21			1	168	61	3	0	430200	IU/ml	430200	5.63367		40	IU/ml		< 12	IU/ml	0	0	0	5.63367	1	< 12	1	< 12	IU/ml	Abbott Real Time PCR	Realtime Abbott	12 IU/ml	38	U/l	38	45	0.844444	35	U/l	35	0.921053	31	U/l	31		U/l		8016	U/l	8.016	60.6
PE9L3TQNC	13	24.02.1976	37.6028	1	168	70	3	0	2380000	IU/ml	2380000	6.37658	1440000	neg	IU/ml	0	neg	IU/ml	0	0	0	6.37658	1	0	1	neg	IU/ml	TaqMan		15 IU/ml	420	U/l	420	45	9.33333	949	U/l	949	2.25952	62	U/l	62	70	U/l	70				44.4
PH43KLQEM	11	05.07.1969	44.2389	1	184	96	3	0	1682000	IU/ml	1682000	6.22583	6300000	neg	IU/ml	0	neg	IU/ml	0	0	0	6.22583									146	U/l	146	45	3.24444	138	U/l	138	0.945205	51	U/l	51	100	U/l	100
phq6174aa	6	19.02.1957	56.6167	1	183	81	3	1	439	IU/ml	439	2.64246		< 15	IU/ml	0	0	IU/ml	0	0	0	2.64246	1	0	1			TaqMan		0	69	U/l	69	45	1.53333	80	U/l	80	1.15942	337	U/l	337	107	U/l	107
PJHQ72YR9	13	14.07.1966	47.2139	1	173	89	2	0	9180000	IU/ml	9180000	6.96284	9180000	neg	IU/ml								1	0	1			TaqMan		15 IU/ml	33	U/l	33	45	0.733333	27	U/l	27	0.818182	24	U/l	24	110	U/l	110	7.3	KU/l	7.3	46
pkmp421x2	125	04.08.1963	50.1583	1	186	80	3	0																										45
PMMSX94LC	47	03.05.1985	28.4111	1	166	74	3	0	178000	IU/ml	178000	5.25042		<20	IU/ml		0	IU/ml	0	0		5.25042	1	0	1			TaqMan		20 IU/ml	281	U/l	281	45	6.24444	121	U/l	121	0.430605	65	U/l	65	74	U/l	74
pp1vacxfh	85	17.05.1947	66.3722	1	183	79	2	0	5500000	IU/ml	5500000	6.74036		160	IU/ml		< 10	IU/ml	10	1		7.74036	1	<10	1	<10	IU/ml	TaqMan		10 IU/ml	99	U/l	99	45	2.2	53	U/l	53	0.535354	27	U/l	27	66	U/l	66				54.9
ppnhjg90t	23	11.01.1966	47.7222	0	168	66	2	0	159000	IU/ml	159000	5.2014	128000	nd		0	< 5	IU/ml	5	0.69897		5.90037	1	< 5	1			Sonstiges	Qnt Heptimax	5 IU/ml	70	U/l	70	34	2.05882	48	U/l	48	0.685714	16	U/l	16							46
pq51w6qc2	42	07.05.1971	42.4	1	175	67	2	0	5900000	IU/ml	5900000	6.77085		neg.	IU/ml		neg.	IU/ml	0	0		6.77085	1			<25	IU/ml	TaqMan		<25	37	U/l	37	45	0.822222	26	U/l	26	0.702703	35	U/l	35	60	U/l	60	7.37	KU/l	7.37	4.5
PRMUPHS74	55	29.03.1969	44.5056	1	196	98.5	3	0	332772	IU/ml	332772	5.52215		84	IU/ml	63		IU/ml	0	0	0	5.52215		0	1						76	U/l	76	45	1.68889	42	U/l	42	0.552632	41	U/l	41	64	U/l	64	12.8	KU/l	12.8	58.9
psqhjs8e5	125	25.06.1967	46.2667	1	172	79	3	0			29800	4.47422	29800	neg.	IU/ml	0	<15	IU/ml	15	1.17609		5.65031	1	<15	1			TaqMan		15 IU/ml	113	U/l	113	45	2.51111	52	U/l	52	0.460177	164	U/l	164	70	U/l	70	7.2	KU/l	7.2
pswdwu0en	23	30.12.1983	29.7528	1	170	70	2	0	8720	IU/ml	8720	3.94052	5450	nd	IU/ml		nd	IU/ml					1	< 5	1			Sonstiges	QNT Heptimax	< 5 IU/ml	37	U/l	37	45	0.822222	32	U/l	32	0.864865	18	U/l	18
ptt4u9xwr	42	01.01.1977	36.75	1	182	85	2	0	880	IU/ml	880	2.94448		neg. < 25	IU/ml			IU/ml					1	0	1	neg.	IU/ml	TaqMan		25 IU/ml	162.9	U/l	162.9	45	3.62	41.2	U/l	41.2	0.252916	101	U/l	101	60	U/l	60	9.826	KU/l	9.826	5
puwrdcy1d	23	08.10.1968	44.9806	1	176	78	3	0	106200	IU/ml	106200	5.02612		964	IU/ml		<615	IU/ml	615	2.78888		7.815	1	< 615	1			Sonstiges	Siemens Branched DNA	615 IU/ml	162	U/l	162	45	3.6	92	U/l	92	0.567901	27	U/l	27	52	U/l	52
puyp0ysda	42	27.08.1966	47.0944	1	182	95	3	0	28000000	IU/ml	28000000	7.44716		neg.	IU/ml		nd						1	0	1	neg.	IU/ml	TaqMan			257	U/l	257	45	5.71111	279	U/l	279	1.0856	507	U/l	507	107	U/l	107	9.053	KU/l	9.053	4.6
pvxljhve0	23	18.08.1982	31.1194	1	182	87	3	0	739	IU/ml	739	2.86864		<615	IU/ml		nd	IU/ml	615	2.78888	615	5.65752	1	< 615	1			Sonstiges	Siemens Branched DNA	615 IU/ml	17	U/l	17	45	0.377778	18	U/l	18	1.05882	63	U/l	63
pw0t8etyw	25	16.04.1976	37.4583	1	174	84	3	1	469769	IU/ml	469769	5.67188		5322	IU/ml		38	IU/ml	38	1.57978		7.25167						Sonstiges	PCR	12	150	U/l	150	45	3.33333	104	U/l	104	0.693333	379	U/l	379	148	U/l	148
pwhgt1aa7	1	28.10.1973	39.925	1	182	81	3	0	8070000	IU/ml	8070000	6.90687		< 15	IU/ml		neg	IU/ml	0	0		6.90687	1	0	1	neg	IU/ml	TaqMan		15 IU/ml	84	U/l	84	45	1.86667	55	U/l	55	0.654762	26	U/l	26	55	U/l	55	8.73	KU/l	8.73	41
PXASK1HXV	12							0			570000	5.75587	570000
PXUQ16W4L	39							0			190000	5.27875	190000			0
pyd055e53	1	07.05.1970	43.4	0	173	80.5	3	0	624000	IU/ml	624000	5.79518		neg.	IU/ml		neg.	IU/ml	0	0		5.79518	1	0	1	neg.	IU/ml	TaqMan		< 15 IU/ml	93	U/l	93	34	2.73529	68	U/l	68	0.731183	44	U/l	44	74	U/l	74	7.38	KU/l	7.38	40
pyx2uty3d	23	03.09.1980	33.0778	1		77.7		0	1051000	IU/ml	1051000	6.0216	3890000	<615	IU/ml	0	< 615	IU/ml	0	0	0	6.0216	1	< 615	1			Sonstiges	Siemens Branched DNA	615 IU/ml	38	U/l	38	45	0.844444	31	U/l	31	0.815789	37	U/l	37	96	U/l	96
Q09V848DV	6	08.01.1967	46.7306	1	176	93	3	0	90200	IU/ml	90200	4.95521		0	IU/ml	0	0	IU/ml	0	0	0	4.95521	1	0	1	0	IU/ml	TaqMan		0	61.2	U/l	61.2	45	1.36	52.3	U/l	52.3	0.854575	32.4	U/l	32.4							53
Q0D1CE1Y1	13	04.05.1962	51.4083	1	180	88	3	1	2920000	IU/ml	2920000	6.46538	632000	36	IU/ml	17	neg	IU/ml	0	0	0	6.46538	1	<25	1	neg	IU/ml	TaqMan		15 IU/ml	228	U/l	228	45	5.06667	165	U/l	165	0.723684	232	U/l	232	113	U/l	113				53.4
q0q7lut4j	1	25.09.1970	43.0167	1	147	76	3	0	4650000	IU/ml	4650000	6.66745		< 15	IU/ml		neg.	IU/ml	0	0		6.66745	1	0	1	neg.	IU/ml	TaqMan		< 15 IE/ml	43	U/l	43	45	0.955556	32	U/l	32	0.744186	11	U/l	11	66	U/l	66	5.9	KU/l	5.9	33
q1kjksawl	33	02.02.1985	28.6639	1	186	73	3	0	29800	IU/ml	29800	4.47422		< 10	IU/ml		< 10	IU/ml	10	1		5.47422	1	< 10	1	< 10	IU/ml	TaqMan		< 10	47	U/l	47	45	1.04444	74	U/l	74	1.57447	41	U/l	41	95	U/l	95
Q2W88HUE5	47	20.09.1983	30.0306	1	171	73	3	0	3240000	IU/ml	3240000	6.51055					<20	IU/ml	20	1.30103		7.81158	1	0	1	0	IU/ml	TaqMan			235	U/l	235	45	5.22222	96	U/l	96	0.408511	43	U/l	43	89	U/l	89	13	KU/l	13
q3d3cvvf5	33	14.01.1973	40.7139	1		85	3	0	1230800	IU/ml	1230800	6.09019		schwach pos.			< 10	IU/ml	10	1		7.09019	1	< 10	1	< 10	IU/ml	TaqMan		< 10	101	U/l	101	45	2.24444	60	U/l	60	0.594059	222	U/l	222
q9lmrt32f	33	29.10.1972	40.9222	1	178	73.5	2	0	19600000	IU/ml	19600000	7.29226		< 10	IU/ml		< 10	IU/ml	10	1		8.29226	1	0	1	< 10	IU/ml	TaqMan		< 10	44	U/l	44	45	0.977778	31	U/l	31	0.704545	26	U/l	26	77	U/l	77	8.77	KU/l	8.77	61
q9un6208l	43	28.01.1979	34.675	1	178	66.2	3	0	6353372	IU/ml	6353372	6.803		52	IU/ml		neg.	IU/ml	0	0		6.803	1	0	1			TaqMan		< 43 IU/ml	1.4	µmol/sl	84	45	1.86667	0.79	µmol/sl	47.4	0.564286	1.07	µmol/sl	64.2							43.8
qa9s96l7f	33	22.05.1979	34.3583	0	162	65.5	3	0	9300	IU/ml	9300	3.96848		< 10	IU/ml		< 10	IU/ml	10	1		4.96848	1	0	1	< 10	IU/ml	TaqMan		< 10	32	U/l	32	34	0.941176	38	U/l	38	1.1875	21	U/l	21							62.4
QANDN6HQ2	35							0			48000	4.68124	48000			0
qct0xd6sj	43	04.07.1976	37.2417	0	156	67.8	3	0	9154	IU/ml	9154	3.96161		1	IU/ml		neg.	IU/ml	0	0		3.96161	1	0	1	neg.	IU/ml	TaqMan		< 43 IU/ml				34		1.71	µmol/sl	102.6		1.21	µmol/sl	72.6	0.19	µmol/sl	11.4				43.7
QDF9N6310	22	29.10.1960	52.9222	1	181	90	3	0	1610000	IU/ml	1610000	6.20683	450000	110	IU/ml	220	neg	IU/ml	0	0	0	6.20683	1	0	1			TaqMan		0,01 KIU/ml	135	U/l	135	45	3	76	U/l	76	0.562963	62	U/l	62	65	U/l	65	9	KU/l	9	59.8
qdtgew0mv	85	24.04.1966	47.4361	0	170	78	2	0	140000	IU/ml	140000	5.14613		< 10	IU/ml		< 10	IU/ml	10	1		6.14613	1	< 10	1	neg.	IU/ml	TaqMan		10				34						19	U/l	19	56	U/l	56				57.7
QERLSUMGY	13	09.02.1960	53.6444	1	170	82	3	0	1140000	IU/ml	1140000	6.0569	170000	neg	IU/ml				0	0	0	6.0569									46	U/l	46	45	1.02222	31	U/l	31	0.673913	26	U/l	26	69	U/l	69				46.4
QFQ25T57K	85	03.09.1987	26.0778	0	165	63	3	0	39000	IU/ml	39000	4.59106		<15	IU/ml	14	neg	IU/ml	0	0	0	4.59106	1	<10	1	<10	IU/ml	TaqMan		10IU/ml	34	U/l	34	34	1	26	U/l	26	0.764706	26	U/l	26	44	U/l	44				58.9
qg293gkj4	30	23.04.1975	38.4389	0	160	70	2	0	1900000	IU/ml	1900000	6.27875		neg,	IU/ml																26	U/l	26	34	0.764706	36	U/l	36	1.38462	16	U/l	16	107	U/l	107	5.28	KU/l	5.28	41
qh8dr98ta	85	04.09.1963	50.075	1	190	91	3	1	3700000	IU/ml	3700000	6.5682		240	IU/ml		pos. < 10	IU/ml	10	1		7.5682	1	0	1	550000	IU/ml	TaqMan		10 IU/ml				45						81	U/l	81	51	U/l	51				60.1
qhqdvktcd	30	21.11.1960	52.8611	0	158	58	3	0	160000	IU/ml	160000	5.20412		11000	IU/ml																63	U/l	63	34	1.85294	51	U/l	51	0.809524	79	U/l	79	79	U/l	79	11.48	KU/l	11.48	48
qkyqhmtpy	85	01.09.1977	36.0833	0	158	60	3	0	4700000	IU/ml	4700000	6.6721					< 10	IU/ml	10	1		7.6721	1	< 10	1	< 10	IU/ml	TaqMan		10 IU/ml				34						40	U/l	40	47	U/l	47				58.9
qlmxldj5d	85	01.10.1951	62	0	153	76	2	1	18000	IU/ml	18000	4.25527		< 10	IU/ml		< 10	IU/ml	10	1		5.25527	1	< 10	1	< 10	IU/ml	TaqMan		10 IU/ml	72	U/l	72	34	2.11765	54	U/l	54	0.75	30	U/l	30	63	U/l	63				57
qnum64sq0	85	19.01.1965	48.7	1	175	75	2	0	59000	IU/ml	59000	4.77085		< 10	IU/ml		< 10	IU/ml	10	1		5.77085	1	0	1	< 10	IU/ml	TaqMan		10 IU/ml				45						54	U/l	54	76	U/l	76				65.7
QPU7LMHS0	12							0			420000	5.62325	420000
QQXDMFSTG	152							0			0	0	0
qsgcax1nq	85	26.01.1950	63.6806	1	172	90	3	0	290000	IU/ml	290000	5.4624		< 10	IU/ml								0											45						50	U/l	50	87	U/l	87				58.8
qtnkpe5r4	85	01.07.1958	55.25	1	172	82	2	0	6000000	IU/ml	6000000	6.77815					< 10	IU/ml	10	1		7.77815	1	< 10	1	< 10	IU/ml	TaqMan		10 IU/ml	32	U/l	32	45	0.711111	33	U/l	33	1.03125	31	U/l	31	75	U/l	75				57.2
qu86ga5hm	85	31.08.1970	43.0861	1	182	100	3	0	160000	IU/ml	160000	5.20412											0											45						227	U/l	227	76	U/l	76				56.7
qu9jrw2py	42	11.08.1960	53.1389	1	186	95.7	3	0	4300000	IU/ml	4300000	6.63347		< 25	IU/ml		neg	IU/ml	0	0	0	6.63347	1			neg	IU/ml	TaqMan		<25	127	U/l	127	45	2.82222	76	U/l	76	0.598425	29	U/l	29	70	U/l	70	6.287	KU/l	6.287	4.5
qv9rxg99x	85	20.01.1966	47.6972	1	182	85	3	0	2500000	IU/ml	2500000	6.39794		< 10	IU/ml		< 10	IU/ml	10	1		7.39794	1	< 10	1	< 10	IU/ml	TaqMan		10 IU/ml	110	U/l	110	45	2.44444	62	U/l	62	0.563636	81	U/l	81	96	U/l	96				62.6
QVHJ8WQWG	1	03.08.1969	44.1611	1	194	130	3	0	398000	IU/ml	398000	5.59988	398000	182	IU/ml	182															44	U/l	44	45	0.977778	38	U/l	38	0.863636	144	U/l	144	66	U/l	66	8.72	KU/l	8.72	41
QWH5WF0PL	12							0			1500000	6.17609	1500000			14
qwpddued1	42	03.01.1952	61.7444	0	163	76.3	2	0	1,4*10^6	IU/ml	1400000	6.14613	379000	neg	IU/ml	15															106	U/l	106	34	3.11765	115	U/l	115	1.08491	148	U/l	148	85	U/l	85	10572	KU/l	10.572	4.4
qwredtfjl	85	04.08.1962	51.1583		154	78	3	0	2800	IU/ml	2800	3.44716		190	IU/ml		< 10	IU/ml	0	0	0	3.44716	1	< 10	1	490	IU/ml	TaqMan		10 IU/ml										15	U/l	15	35	U/l	35				60.5
qws1adqdq	1	04.03.1956	57.575	0	160	54	3	0	5270000	IU/ml	5270000	6.72181			IU/ml		neg.	IU/ml	0	0		6.72181	1	0	1	neg.	IU/ml	TaqMan		15 IU/ml	117	U/l	117	34	3.44118	76	U/l	76	0.649573	74	U/l	74	86	U/l	86	10.35	KU/l	10.35	42
qy4n2aq9r	30	02.04.1957	56.4972	1	173	79	3	1	970000	IU/ml	970000	5.98677																			292	U/l	292	45	6.48889	175	U/l	175	0.599315	92	U/l	92	58	U/l	58	5.74	KU/l	5.74	45
qyal2kqww	87	17.11.1951	61.8722	0			2	1	1281000	IU/ml	1281000	6.10755	3750000	< 43	IU/ml	19												TaqMan	Amplicor/TaqMan	60 IU/ml(Serum) , 50 IU/ml(Pla	41	U/l	41	34	1.20588	45	U/l	45	1.09756	60	U/l	60	89	U/l	89				4.4
qyqhx6utp	13	03.11.1973	39.9111	0	173	78	2	0	164000	IU/ml	164000	5.21484	105000	<25	IU/ml	0	neg	IU/ml	0	0	0	5.21484	1	0	1	neg	IU/ml	TaqMan		15 IU/ml	34	U/l	34	34	1	29	U/l	29	0.852941	20	U/l	20	85	U/l	85
QYUAA5FVN	44	29.06.1955	58.2556	1	183	78	3	0	4517485	IU/ml	4517485	6.6549	2500000	<15	IU/ml	14							1	0	1			TaqMan		<25	20.3	U/l	20.3	45	0.451111	35.5	U/l	35.5	1.74877	82.1	U/l	82.1	78.5	U/l	78.5				37.1
r0axg627s	87	02.10.1966	46.9972	0	170	53	2	0	470	IU/ml	470	2.6721	47500	2850	IU/ml		< 15	IU/ml	15	1.17609		3.84819						TaqMan		< 43 IU/ml	45	U/l	45	34	1.32353	35	U/l	35	0.777778	16	U/l	16	58	U/l	58
R1KA786X1	13							0
r1prv1ea1	11	27.04.1948	65.4278	1	180	80	3	0	2950000	IU/ml	2950000	6.46982		313	IU/ml		< NWG		15	1.17609	15	7.64591	1	0	1	1513000	IU/ml	TaqMan		15 IU/ml	281	U/l	281	45	6.24444	249	U/l	249	0.886121	70	U/l	70	59	U/l	59				45
r1yq4x0uv	28	19.12.1959	53.7833	0	168	70	2	0	1670000	IU/ml	1670000	6.22272	74000	neg	IU/ml	0		IU/ml	0	0	0	6.22272	1	0	1	neg	IU/ml	TaqMan		<15				34						39	U/l	39	71	U/l	71				4.4
r2yy30f0s	13	10.08.1978	35.1417	1	168	78	3	0	545000	IU/ml	545000	5.7364	123000	neg	IU/ml	0	neg	IU/ml	0	0	0	5.7364	1	0	1			TaqMan		15 IU/ml	87	U/l	87	45	1.93333	49	U/l	49	0.563218	55	U/l	55	94	U/l	94
r786qme04	30	22.02.1956	57.6083	0	168	55	3	0																										34
r7xxf16pn	28	04.11.1981	31.9083	1	176	89	3	0	59800	IU/ml	59800	4.7767		neg	IU/ml	14		IU/ml	0	0	0	4.7767	1	0	1			TaqMan		<15				45						52	U/l	52	69	U/l	69				4.8
rak4ktdco	28	15.05.1964	49.3778	1	172	78	3	0			23300	4.36736	23300	neg	IU/ml			IU/ml	0	0	0	4.36736	1	0	1	neg	IU/ml	TaqMan		<15				45						53	U/l	53	72	U/l	72	6.5	KU/l	6.5	4.8
rcw7quxv2	152	19.11.1963	49.8667	0	163	49		0	1700000	IU/ml	1700000	6.23045	1290000	< 15	IU/ml	0			0	0	0	6.23045									16	U/l	16	34	0.470588	25	U/l	25	1.5625	20	U/l	20	123	U/l	123	9.36	KU/l	9.36	37
rds692ped	28	01.07.1965	48.25	0	163	75	2	0	1280000	IU/ml	1280000	6.10721	37700	neg	IU/ml	0	neg	IU/ml	0	0	0	6.10721	1	0	1	neg	IU/ml	TaqMan		<15				34						18	U/l	18	70	U/l	70	8	KU/l	8	4.6
rfj3eyyd7	7	25.07.1967	46.1833	1	170	73	3	0	5180000	IU/ml	5180000	6.71433	1550000	102000	IU/ml	102000	1180	IU/ml	1180	3.07188	706	9.78621	1	1090000	0			TaqMan		<25	120	U/l	120	45	2.66667				0	727	U/l	727	178	U/l	178	3.074	KU/l	3.074
rjx72cgqj	28	13.03.1981	32.55	0	168	67.5	3	0	12400	IU/ml	12400	4.09342	1990	neg	IU/ml	0	neg	IU/ml	0	0	0	4.09342	1	0	1	neg	IU/ml	TaqMan		<15	69	U/l	69	34	2.02941	40	U/l	40	0.57971	36	U/l	36	143	U/l	143	8.5	KU/l	8.5	4.3
RL5C6KCDM	17	01.11.1983	29.9167	0	169	63.6	3	0	452226	IU/ml	452226	5.65536		17	IU/ml	14	neg	IU/ml	0	0	0	5.65536		0	1						50	U/l	50	34	1.47059	38	U/l	38	0.76				57	U/l	57
rnn4ejmax	28	25.02.1958	55.6	1	186	80	3	0	826*10^3	IU/ml	826000	5.91698	3790	neg	IU/ml	0							0					TaqMan		<15	89	U/l	89	45	1.97778	100	U/l	100	1.1236	50	U/l	50	68	U/l	68	9.4	KU/l	9.4	4.2
rptl66gcf	85	14.05.1943	70.3806	0	156	74	2	0	3000000	IU/ml	3000000	6.47712		<10	IU/ml		<10	IU/ml	10	1		7.47712	1	< 10	1	< 10	IU/ml	TaqMan		10 IU/ml	221	U/l	221	34	6.5	191	U/l	191	0.864253	29	U/l	29	82	U/l	82				48.8
rq4k61alh	14	16.01.1980	33.7083	0	160	68	3	0	101000	IU/ml	101000	5.00432		nachgewiesen	IU/ml	0	< 15	IU/ml	0	0	0	5.00432	1	0	1			Sonstiges	PCR	< 15 IU/ml	55	U/l	55	34	1.61765	30	U/l	30	0.545455	36	U/l	36	71	U/l	71	6.84	KU/l	6.84	48.5
rqs3mjq36	81	24.06.1980	33.2694	1	168	81.5	3	0	1820000	IU/ml	1820000	6.26007		< 10	IU/ml	10															66	U/l	66	45	1.46667	68	U/l	68	1.0303	36	U/l	36	71	U/l	71	14	KU/l	14	45.2
rt0wlu4vf	14	07.06.1979	34.3167	1	170	84	3	0	930000	IU/ml	930000	5.96848	105000	neg.	IU/ml	0	neg.	IU/ml	0	0	0	5.96848	1	0	1			Sonstiges	PCR	50 IU/ml	55	U/l	55	45	1.22222	43	U/l	43	0.781818	59	U/l	59	93	U/l	93	10.99	KU/l	10.99	64.3
ruxna440a	1	12.03.1962	51.5528	1	186	101	3	1	360000	IU/ml	360000	5.5563		311	IU/ml		neg.	IU/ml	0	0		5.5563						TaqMan		15 IU/ml	122	U/l	122	45	2.71111	143	U/l	143	1.17213	54	U/l	54	98	U/l	98	2.41	KU/l	2.41	27
ryh00x2wq	17	19.11.1977	35.8667	1	190	162	3	0	57000	IU/ml	57000	4.75587		nd	IU/ml		0	IU/ml	0	0	0	4.75587	1	0	1	0	IU/ml	Abbott Real Time PCR	Abbott Real Time	<15-50 IU/ml	49	U/l	49	45	1.08889	31	U/l	31	0.632653	55	U/l	55	76	U/l	76	76	KU/l		49.6
S251JMRN6	12	26.07.1965	48.1806	1	186		3	0	1780000	IU/ml	1780000	6.25042	5670000	neg	IU/ml	0	neg	IU/ml	0	0		6.25042	1	0	1	neg	IU/ml	TaqMan		15 IU/ml	55	U/l	55	45	1.22222	43	U/l	43	0.781818	13	U/l	13
s4162qc1e	78	30.03.1959	54.5028	0	164	54	3	0	180000	IU/ml	180000	5.25527											0					TaqMan		< 15 IU/ml	224	U/l	224	34	6.58824	310	U/l	310	1.38393	249	U/l	249
S4EG4E0GE	47	27538	38.3528	1	177	104	3	0			460000	5.66276	460000						20	1.30103		6.96379						TaqMan		20			111	45	2.46667			109	0.981982			102			95
s4r5tmnv2	85	03.11.1983	29.9111	1	191	103	3	0	280000	IU/ml	280000	5.44716	432000	< 10	IU/ml	0	<10	IU/ml	0	0	0	5.44716	1	<10	1			TaqMan		10IU/ml				45						36	U/l	36	55	U/l	55				64.7
s6a4hnj2r	78	15.08.1981	32.1278	1	172	71	3	0	92000	IU/ml	92000	4.96379	2160	neg.	IU/ml		neg.	IU/ml	0	0		4.96379	1					TaqMan		< 15 IU/ml	258	U/l	258	45	5.73333	85	U/l	85	0.329457	31	U/l	31	85	U/l	85
s73cklkya	78	02.11.1961	51.9139	1	170	66	3	0	8300	IU/ml	8300	3.91908	155000	neg.	IU/ml		neg.	IU/ml	0	0		3.91908	1	0	1	neg.	IU/ml	TaqMan		< 15 IU/ml	83	U/l	83	45	1.84444	101	U/l	101	1.21687	48	U/l	48
sa2kcu8dh	78	04.12.1972	40.825	1	173	65	3	0	4900	IU/ml	4900	3.6902	27300	neg.	IU/ml		neg.	IU/ml	0	0		3.6902	1	0	1			TaqMan		15 IU/ml	27	U/l	27	45	0.6	29	U/l	29	1.07407	29	U/l	29
SAQW286RC	12	22.11.1968	44.8583	1	188	120	2	0	4170000	IU/ml	4170000	6.62014		<15	IU/ml	14	neg	IU/ml	0	0	0	6.62014	1	0	1			TaqMan		15 IU/ml	49	U/l	49	45	1.08889	31	U/l	31	0.632653	33	U/l	33	97	U/l	97
sdnvym5qe	78	04.09.1977	36.075	1	172	59	3	0	260000	IU/ml	260000	5.41497	979000	170000	IU/ml		180	IU/ml	180	2.25527		7.67025	1	0	1			TaqMan		< 15 IU/ml	75	U/l	75	45	1.66667	47	U/l	47	0.626667	78	U/l	78
SFEHGVVHA	12							0			11000000	7.04139	11000000
sge1ax6ye	16	16.06.1965	48.2917	1	183	110	3	0	894000	IU/ml	894000	5.95134		27	IU/ml	75															64.8	U/l	64.8	45	1.44	38.5	U/l	38.5	0.594136	55.8	U/l	55.8	65	U/l	65
SH82SPDJT	39	16.03.1982	31.5417	0	168	59	3	0	765200	IU/ml	765200	5.88377	246000	1720	IU/ml	1720	<12	IU/ml	0	0	0	5.88377	1	63000	0			Abbott Real Time PCR	Abbott	<12	52	U/l	52	34	1.52941	35	U/l	35	0.673077	77	U/l	77	53	U/l	53	8.7	KU/l	8.7	48
shpy2y4sw	88	05.05.1954	59.4056	0			3	0	27700	IU/ml	27700	4.44248	11700		IU/ml	0		IU/ml	0	0	0	4.44248	1	0	1	neg.	IU/ml	TaqMan		0,010 IU/ml	43	U/l	43	34	1.26471	43	U/l	43	1	29	U/l	29	111	U/l	111				4.9
skqtqj26s	25	12.07.1972	41.2194	1	182	100	3	0	6282890	IU/ml	6282890	6.79816		0	IU/ml		0	IU/ml	0	0		6.79816	1	0	1						181	U/l	181	45	4.02222	387	U/l	387	2.13812	91	U/l	91	59	U/l	59	4.1	KU/l	4.1
sl4uspl39	55	04.04.1979	34.4917	0	160	55	3	0	162000	IU/ml	162000	5.20952		neg.	IU/ml	0	n.nachw.	IU/ml	0	0		5.20952	1	0	1						125	U/l	125	34	3.67647	73	U/l	73	0.584	30	U/l	30	62	U/l	62	8.7	KU/l	8.7	55.6
snk16ef9q	14	03.05.1951	62.4111	1	188	85	2	0	13000000	IU/ml	13000000	7.11394		<15	IU/ml		<15	IU/ml	15	1.17609		8.29003	1	0	1	neg.	IU/ml	Sonstiges	PCR	15 IU/ml	26	U/l	26	45	0.577778	26	U/l	26	1	24	U/l	24	68	U/l	68	7.27	KU/l	7.27	45
snr5c1q7k	134	04.12.1962	50.825	0	162	54	3	0	951000	IU/ml	951000	5.97818	878000		IU/ml	99000		IU/ml	42300	4.62634	42300	10.6045	1								105	U/l	105	34	3.08824	74	U/l	74	0.704762	148	U/l	148	112	U/l	112				4.3
spk2dnjyx	6	08.02.1981	32.6472	1	181	70	3	0	2440233	IU/ml	2440233	6.38743		< 15	IU/ml	14	0	IU/ml	0	0	0	6.38743	1	0	1			TaqMan		0	82.2	U/l	82.2	45	1.82667	41.4	U/l	41.4	0.50365	40.2	U/l	40.2	78	U/l	78	7.41	KU/l	7.41
sq4jsy1aq	14	25.01.1958	55.6833	0	173	79	3	0	1780000	IU/ml	1780000	6.25042		n.d.		108	<15	IU/ml	15	1.17609		7.42651	1	0	1	neg.	IU/ml	Sonstiges	PCR	ca. 15 IU/ml	127	U/l	127	34	3.73529	85	U/l	85	0.669291	21	U/l	21	41	U/l	41	7.05	KU/l	7.05	4.27
sr7055r4q	6	06.02.1954	59.6528	1	167	76	3	0	5130000	IU/ml	5130000	6.71012		23	IU/ml	14	0	IU/ml	0	0	0	6.71012	1	0	1	0	IU/ml	TaqMan		0	40.8	U/l	40.8	45	0.906667	37.2	U/l	37.2	0.911765	42.6	U/l	42.6	67	U/l	67	7.16	KU/l	7.16
SWG24F1RD	85	09.01.1961	52.7278	1	162	96.8	3	0	740000	IU/ml	740000	5.86923	740000	<10	IU/ml	14	neg	IU/ml	0	0	0	5.86923	1	<10	1	neg	IU/ml	TaqMan		10IU/ml	217	U/l	217	45	4.82222	124	U/l	124	0.571429	91	U/l	91	80	U/l	80
syfe85va6	47	07.01.1965	48.7333	1	185	62	3	0	2190000	IU/ml	2190000	6.34044	3170000	225	IU/ml	0	<20	IU/ml	20	1.30103		7.64147	1	0	1			TaqMan		< 20 IU/ml	56	U/l	56	45	1.24444	46	U/l	46	0.821429	271	U/l	271	64	U/l	64
t0mpvtke3	137	16.04.1970	43.4583	1	186	100	3	1	853254	IU/ml	853254	5.93108	44700	100	IU/ml	14		IU/ml					1	< 12	1	< 12	IU/ml	Abbott Real Time PCR	Abbott Realtime HCV Assay	< 12 IU/ml	231	U/l	231	45	5.13333	129	U/l	129	0.558442	115	U/l	115	66	U/l	66				57.2
t37fm29mv	47	16.03.1956	57.5417	1	160	77	2	0	162000	IU/ml	162000	5.20952	57800	< 20	IU/ml	14	0	IU/ml	0	0	0	5.20952	1	0	1	0	IU/ml	TaqMan		20 IU/ml	109	U/l	109	45	2.42222	54	U/l	54	0.495413	55	U/l	55	88	U/l	88				0.9
T4E4JTFWG	35							0			1200000	6.07918	1200000
t4n81sn8n	25	11.06.1978	35.3056	1	182	61	3	0	74582	IU/ml	74582	4.87263											0								53	U/l	53	45	1.17778	48	U/l	48	0.90566	26	U/l	26	118	U/l	118
t55g2xvac	86	14.03.1969	44.5472	0	167	59	2	0	294000	IU/ml	294000	5.46835		16	IU/ml	14															45	U/l	45	34	1.32353	81	U/l	81	1.8	14	U/l	14	40	U/l	40	6.918	KU/l	6.918
T5RFETVRA	22	24.03.1973	40.5194	1	172	81	3	0	42100	IU/ml	42100	4.62428	15	neg	IU/ml	0	neg	IU/ml	0	0	0	4.62428									443	U/l	443	45	9.84444	162	U/l	162	0.365688	96	U/l	96	85	U/l	85	7.6	KU/l	7.6	56.9
t7m9543ts	25	08.04.1959	54.4806	1	172	70	3	0	17440	IU/ml	17440	4.24155		0	IU/ml		0	IU/ml	0	0		4.24155	0								48	U/l	48	45	1.06667	45	U/l	45	0.9375	262	U/l	262	116	U/l	116				51.9
t92wftap1	7	15.07.1978	35.2111	0	163	50	3	0	3640000	IU/ml	3640000	6.5611	1280000	0	IU/ml	0	0	IU/ml	0	0	0	6.5611	1	0	1	0	IU/ml	TaqMan		<25	129	U/l	129	34	3.79412				0	44	U/l	44	56	U/l	56	5.865	KU/l	5.865	3.85
t9dj96l8r	21	14.09.1987	26.0472	0	170	60	3	0	1662169	IU/ml	1662169	6.22068		509	IU/ml		>12	IU/ml	12	1.07918		7.29986	1	<12	1			Abbott Real Time PCR	Real Time Abbott	< 12 IU/ml	48	U/l	48	34	1.41176	38	U/l	38	0.791667	16	U/l	16	85	U/l	85	8.748	KU/l	8.748	55
t9jjmdrwg	33	23.03.1978	35.5222	1	190	83	3	1	5550000	IU/ml	5550000	6.74429																			148	mg%		45		115	mg%			21	mg%
T9RH2CCFM	35	01.02.1973	40.6667	0	175	76	3	0	11000	IU/ml	11000	4.04139	1900	neg	IU/ml	0	neg	IU/ml	0	0	0	4.04139									61	U/l	61	34	1.79412	39	U/l	39	0.639344	9	U/l	9	65	U/l	65				43
t9w8ycq1c	25	25.02.1964	49.6	1	176	52	3	0	1564169	Kopien/ml	601603	5.77931											0								96	U/l	96	45	2.13333	60	U/l	60	0.625	54	U/l	54	26	U/l	26
tagj5hkyq	17	17.11.1981	31.8722	1	178	66	3	0	4100000	IU/ml	4100000	6.61278		17	IU/ml		0	IU/ml	0	0	0	6.61278	1	0	1						248	U/l	248	45	5.51111	115	U/l	115	0.46371	11	U/l	11	46	U/l	46				51.2
TC113DC9D	14	23.08.1978	35.1056	1	179	78	3	0	300759	IU/ml	300759	5.47822	87000	<30	IU/ml	0	<15	IU/ml	15	1.17609		6.65431	1	<15	1	<15	IU/ml	Sonstiges	PCR	15	169	U/l	169	45	3.75556	85	U/l	85	0.502959	61	U/l	61	80	U/l	80	14.07	KU/l	14.07	61.6
tc9wdghe7	25	07.02.1959	54.65	0	157	49	3	1																										34
tedsgxf6c	47	13.02.1949	64.6333	1	183	80	2	0	1600000	IU/ml	1600000	6.20412	512000	< 20	IU/ml	0	neg.	IU/ml	0	0	0	6.20412	1	0	1	neg.	IU/ml	TaqMan		< 20 IU/ml	125	U/l	125	45	2.77778	58	U/l	58	0.464	18	U/l	18	69	U/l	69	5.3	KU/l	5.3
tex3lxnep	33	04.03.1985	28.575	1	179	75	3	0	1480000	IU/ml	1480000	6.17026		10-25	IU/ml																1273	U/l	1273	45	28.2889	361	U/l	361	0.283582	70	U/l	70	100	U/l	100	8.58	KU/l	8.58	59.7
tfypfsg8j	25	14.10.1986	26.9639	1	186	77	3	0	3706628	IU/ml	3706628	6.56898		0	IU/ml		0	IU/ml	0	0		6.56898	1	0	1	0	IU/ml	Abbott Real Time PCR	Abbott Realtime	0	177	U/l	177	45	3.93333	489	U/l	489	2.76271	66	U/l	66	124	U/l	124	9.5	KU/l	9.5	7.6
tg1dgxt75	33	12.09.1975	38.0528	0	172	65	3	0	7250000	IU/ml	7250000	6.86034											0								170	U/l	170	34	5	102	U/l	102	0.6	44	U/l	44	69	U/l	69				60
THTP830RF	47	23.12.1969	43.7722	1	172	81	3	0	43000	IU/ml	43000	4.63347	121000	<20	IU/ml	14	0	IU/ml	0	0		4.63347	1	0	1	0	IU/ml	TaqMan			31	U/l	31	45	0.688889	23	U/l	23	0.741935	30	U/l	30	62	U/l	62	12.4	KU/l	12.4	60.2
thy43cc1x	16	09.04.1968	45.4778	0	171	51	3	0	269000	IU/ml	269000	5.42975	36100	<15	IU/ml	0			0	0	0	5.42975						TaqMan		<15	126.5	U/l	126.5	34	3.72059	98.5	U/l	98.5	0.778656	192.9	U/l	192.9	59	U/l	59	6215	KU/l	6.215	37.4
tl7j5g70h	11	20.11.1971	41.8639	1	172	68	3	0	15546000	IU/ml	15546000	7.19162	8430000	~10	IU/ml		neg	IU/ml	0	0	0	7.19162						TaqMan		15 IU/ml	105	U/l	105	45	2.33333	51	U/l	51	0.485714	31	U/l	31	49	U/l	49	11.2	KU/l	11.2	39.8
tllxk80xw	23	14.05.1965	48.3806	0	160	64	3	0	647700	IU/ml	647700	5.81137		<615	IU/ml		neg.	IU/ml	0	0	0	5.81137	1	< 615	1			Sonstiges	Siemens Branched DNA	615 IU/ml	164	U/l	164	34	4.82353	68	U/l	68	0.414634	43	U/l	43	65	U/l	65
tlt435w8q	23	07.08.1983	30.15	1	170	73	3	0	4843000	IU/ml	4843000	6.68511	1340000	<615	IU/ml	134	neg.	IU/ml	0	0	0	6.68511	1	< 615	1			Sonstiges	Siemens Branched DNA		431	U/l	431	45	9.57778	150	U/l	150	0.348028	54	U/l	54
TLXV7DU4D	1	15.05.1969	44.3778	1	193	130	2	0	1800000	IU/ml	1800000	6.25527		neg	IU/ml		neg	IU/ml	0	0		6.25527	1			neg.	IU/ml	TaqMan		<15 IU/ml	48	U/l	48	45	1.06667	36	U/l	36	0.75	23	U/l	23	77	U/l	77	8.96	KU/l	8.96	44
TM2R723M0	47							0
tprg2ppcc	44	19.07.1970	43.2	0	170	63	3	0	132626	IU/ml	132626	5.12263	135000	< 25	IU/ml		neg.	IU/ml	0	0	0	5.12263	1	0	1	neg.	IU/ml	TaqMan		< 25	76.3	U/l	76.3	34	2.24412	49.8	U/l	49.8	0.652687	45.4	U/l	45.4	116	U/l	116				38.4
tr1uqluxg	44	09.11.1959	53.8944	1	178	82	3	0	2577723	IU/ml	2577723	6.41124	13500	< 25	IU/ml	14	neg.	IU/ml	0	0		6.41124	0					TaqMan		< 25	140	U/l	140	45	3.11111	136	U/l	136	0.971429	181	U/l	181	99.6	U/l	99.6				35.4
trku2162m	21	21.12.1977	35.7778	0	167	62	3	0	251780	IU/ml	251780	5.40102		18	IU/ml		<12	IU/ml	12	1.07918		6.4802	1	<12	1	<12	IU/ml	Abbott Real Time PCR	Realtime Abbott	12 IU/ml	238	U/l	238	34	7	120	U/l	120	0.504202	43	U/l	43	61	U/l	61	9.004	KU/l	9.004	52.8
TS504Q3P1	13	06.08.1975	38.1528	1	175	146.7	3	0	8340	IU/ml	8340	3.92117	1700	neg	IU/ml	14	neg	IU/ml	0	0	0	3.92117	1	0	1	neg	IU/ml	TaqMan		15 IU/ml	120	U/l	120	45	2.66667	47	U/l	47	0.391667	103	U/l	103	107	U/l	107
tt7mjnnpd	13	05.07.1974	39.2389	0	160	80	3	0	3030000	IU/ml	3030000	6.48144	801000	neg	IU/ml	14	neg	IU/ml	0	0	0	6.48144	1	0	1	neg	IU/ml	TaqMan		15 IU/ml	137	U/l	137	34	4.02941	76	U/l	76	0.554745	24	U/l	24	87	U/l	87				45.5
ttg83f8uw	6	12.10.1953	59.9694	0	172	85	3	0	166000	IU/ml	166000	5.22011		3357	IU/ml	11900							1					TaqMan		0	84.6	U/l	84.6	34	2.48824	53.4	U/l	53.4	0.631206	64.2	U/l	64.2	81	U/l	81	7.68	KU/l	7.68
tv33fm6xa	22	27.10.1952	60.9278	1	183	98	2	0	90900	IU/ml	90900	4.95856		neg.	IU/ml		neg.	IU/ml	0	0		4.95856	1	0	1	neg.	IU/ml	TaqMan		0,01 KiU/ml	347	U/l	347	45	7.71111	147	U/l	147	0.423631	114	U/l	114	126	U/l	126	11.8	KU/l	11.8	61.4
tvhthvlqm	25	07.02.1978	35.65	1	176	76	3	1	2065480	Kopien/ml	794415	5.90005		22	Kopien/ml																298	U/l	298	45	6.62222	164	U/l	164	0.550336	31	U/l	31	81	U/l	81	7.2	KU/l	7.2	55.9
TWQRKFVCG	12							0			390000	5.59106	390000
twx9hytdk	22	31.05.1959	54.3361	1	183	132	3	0	11400	IU/ml	11400	4.0569		neg.	IU/ml		neg.	IU/ml	0	0		4.0569	0					TaqMan		ca. 0,01 KiU/ml	248	U/l	248	45	5.51111	167	U/l	167	0.673387	133	U/l	133	96	U/l	96	11.2	KU/l	11.2	49.3
TXSM1AMKV	7	01.03.1960	53.5833	0	160	59	3	0	7890000	IU/ml	7890000	6.89708	2500000	40700	IU/ml	48000	<25	IU/ml	0	0	0	6.89708	1	0	1	0	IU/ml	TaqMan		<25 IU/ml	71	U/l	71	34	2.08824				0	36	U/l	36	61	U/l	61	10.44	KU/l	10.44
txume7p2t	44	24.03.1965	48.5194	1	195	91	3	1	3017948	IU/ml	3017948	6.47971	1750000	132	IU/ml		1008681	IU/ml	1008681	6.00375	320000	12.4835	1					TaqMan		< 25	11.4	U/l	11.4	45	0.253333	21.9	U/l	21.9	1.92105	54.3	U/l	54.3	55.2	U/l	55.2				33.5
u1jvyfljy	22	12.12.1971	41.8028	1	179	91	3	0	69500	IU/ml	69500	4.84198		neg.	IU/ml		neg.	IU/ml	0	0		4.84198	1	0	1	neg.	IU/ml	TaqMan		0,01 KiU/ml	129	U/l	129	45	2.86667	64	U/l	64	0.496124	36	U/l	36	61	U/l	61	13.6	KU/l	13.6	59.8
u3rflm6ce	44	03.11.1962	50.9111	0	163	71.5	3	1	96907	IU/ml	96907	4.98636		neg.	IU/ml	14	< 25	IU/ml	25	1.39794		6.3843	1	< 25	1	neg.	IU/ml	TaqMan		< 25	168	U/l	168	34	4.94118	143	U/l	143	0.85119	405	U/l	405	78.1	U/l	78.1				39.4
u4qxwdf6p	44	23.12.1962	50.7722	1	172	75.8	3	0	4292108	IU/ml	4292108	6.63267	2020000	117	IU/ml	109	neg.	IU/ml	0	0	0	6.63267	1	0	1			TaqMan		< 25,0	59.1	U/l	59.1	45	1.31333	57.8	U/l	57.8	0.978003	100	U/l	100	95.7	U/l	95.7				39.4
u58lge1xa	73	25.08.1947	66.1	1	178	80	3	0	212000	IU/ml	212000	5.32634											0											45						90	U/l	90	63	U/l	63
u5vpjsjrx	124	07.10.1962	50.9833	1	176	105	3	0																										45
u688umgmy	44	20.09.1958	55.0306	1	183	90	2	0	38062	IU/ml	38062	4.58049	322000	< 25	IU/ml	14	neg.	IU/ml	0	0		4.58049	1	0	1	neg.	IU/ml	TaqMan		< 25	16.8	U/l	16.8	45	0.373333	34.4	U/l	34.4	2.04762	23.8	U/l	23.8	80.6	U/l	80.6				41
u71ax70wh	21	20.04.1958	55.4472	0	165	87	2	0	64270	IU/ml	64270	4.80801		schwach pos.	IU/ml		nd						1	<12	1	<12	IU/ml	Abbott Real Time PCR	Real Time Abbott	<12	30	U/l	30	34	0.882353	38	U/l	38	1.26667	57	U/l	57				9.62	KU/l	9.62	58.2
u8hwrnnvc	66	08.07.1986	27.2306	0		42	3	0	50100	IU/ml	50100	4.69984			IU/ml	0	<0,023	IU/ml	0	0		4.69984	1	< 0,023	1	< 0,023	IU/ml	Sonstiges		<0,023 IU/ml	71	U/l	71	34	2.08824	47	U/l	47	0.661972	43									38
u8u2k09mj	44	21.04.1980	33.4444	0	155	47	3	0	69906	IU/ml	69906	4.84451	52000	< 0,125	IU/ml	0	< 25	IU/ml	0	0	0	4.84451	1	0	1			TaqMan		< 0,125	156	U/l	156	34	4.58824	120	U/l	120	0.769231	34.6	U/l	34.6	58.4	U/l	58.4				42.6
uegn084r8	88	17.12.1960	52.7889	1	175	113	3	1	253000	IU/ml	253000	5.40312	675000	< 15	IU/ml			IU/ml	0	0	0	5.40312				neg.	IU/ml	TaqMan		15 IU/ml	180	U/l	180	45	4	158	U/l	158	0.877778	72	U/l	72	97	U/l	97
uehx6tu7q	78	28.11.1985	27.8417	0	158	58	3	0	8000	IU/ml	8000	3.90309											0					TaqMan		< 15 IU/ml	37	U/l	37	34	1.08824	29	U/l	29	0.783784	17	U/l	17	101	U/l	101	10.7	KU/l	10.7
UEU7KP23W	7	05.07.1954	59.2389	1	179	73	3	0	7310000	IU/ml	7310000	6.86392	4000000	2430	IU/ml	3500	<25	IU/ml	15	1.17609	15	8.04001	1	0	1	922000	IU/ml	TaqMan		<25	132	U/l	132	45	2.93333				0	91	U/l	91	49	U/l	49	10.63	KU/l	10.63
ug2gg0f5g	7	20.12.1963	49.7806	0	172	67	3	0	31300000	IU/ml	31300000	7.49554	11700000	<25	IU/ml	14	0	IU/ml	0	0	0	7.49554	1	0	1	0	IU/ml	TaqMan		<25	186	U/l	186	34	5.47059				0	16	U/l	16	53	U/l	53	5.461	KU/l	5.461
uhhaesjqy	6	05.10.1950	62.9889	0	170	70	3	0	213197	IU/ml	213197	5.32878		0	IU/ml	14	0	IU/ml	0	0	0	5.32878	1	0	1	15	IU/ml	TaqMan		0	114	U/l	114	34	3.35294	91	U/l	91	0.798246	47	U/l	47	129	U/l	129	5.848	KU/l	5.848	56
ujysd0qrv	85	13.05.1974	39.3833	1	170	64	3	0	2200000	IU/ml	2200000	6.34242		< 10	IU/ml		<10	IU/ml	10	1		7.34242	1	<10	1	<10	IU/ml	TaqMan		10 IU/ml	50	U/l	50	45	1.11111	40	U/l	40	0.8	20	U/l	20	62	U/l	62				64.9
uk13v04c5	6	02.05.1966	47.4139	1	183	90	3	0	206000	IU/ml	206000	5.31387		neg.	IU/ml	0	neg.	IU/ml	0	0	0	5.31387	1	0	1	0	IU/ml	TaqMan		0 IU/ml	26	U/l	26	45	0.577778	25.6	U/l	25.6	0.984615	21	U/l	21	47	U/l	47	9.228	KU/l	9.228
umk53rxwk	6	14.02.1957	56.6306	0	170	62	3	0	33100	IU/ml	33100	4.51983		880	IU/ml	2400	0	IU/ml	0	0	0	4.51983	1	0	1	0	IU/ml	TaqMan		0 IU/ml	49.9	U/l	49.9	34	1.46765	49.6	U/l	49.6	0.993988	87	U/l	87	54	U/l	54				55.8
UP1EL838C	12	27.02.1956	57.5944	0	182	100	2	0	239000	IU/ml	239000	5.3784		0	IU/ml		0	IU/ml	0	0		5.3784	1	0	1	0	IU/ml	TaqMan		15 u/l	224	U/l	224	34	6.58824	138	U/l	138	0.616071	31	U/l	31	73	U/l	73	8.1	KU/l	8.1
UQ5S467V5	47	29.04.1981	32.4222	1	169	70	3	0	7180000	IU/ml	7180000	6.85612	7700000	<20	IU/ml	0	0	IU/ml	0	0	0	6.85612	1	0	1	0	IU/ml				170	U/l	170	45	3.77778	87	U/l	87	0.511765	36	U/l	36	75	U/l	75	9.4	KU/l	9.4	48.4
urs295vm2	6	20.12.1945	67.7806	0	165	80	3	0	168000	IU/ml	168000	5.22531		< 15	IU/ml	0	neg.	IU/ml	0	0	0	5.22531	1	0	1	0	IU/ml	TaqMan		0 IU/ml	60.3	U/l	60.3	34	1.77353	39.8	U/l	39.8	0.660033	46	U/l	46	111	U/l	111	14.01	KU/l	14.01	56.7
ush2w3pt4	6	23.05.1966	47.3556	1	174	82	3	0	19173696	IU/ml	19173696	7.28271		< 15	IU/ml	0	0	IU/ml	0	0	0	7.28271	1	0	1	0	IU/ml	TaqMan		0	224	U/l	224	45	4.97778	103	U/l	103	0.459821	47	U/l	47	62	U/l	62	11.42	KU/l	11.42
uu6x17su3	6	12.10.1952	60.9694	1	175	92	3	0	1086886	IU/ml	1086886	6.03618	431000	152	IU/ml	446	0	IU/ml	0	0	0	6.03618	1	0	1	0	IU/ml	TaqMan		0	55.2	U/l	55.2	45	1.22667	70.2	U/l	70.2	1.27174	313	U/l	313	148	U/l	148	4.9	KU/l	4.9	4030
uve6tjkln	6	27.03.1963	50.5111	1	175	80	2	0	2216452	IU/ml	2216452	6.34566		0	IU/ml	14	0	IU/ml	0	0	15	6.34566	1	0	1			TaqMan		0	36	U/l	36	45	0.8	25.8	U/l	25.8	0.716667	19.2	U/l	19.2	44	U/l	44	6.97	KU/l	6.97	63
uwxdg6t8m	25	12.03.1974	39.5528	1	180	114	3	0	4870390	IU/ml	4870390	6.68756																			43	U/l	43	45	0.955556	40	U/l	40	0.930233	29	U/l	29	75	U/l	75	7.5	KU/l	7.5	57.9
uxkmylqec	1	26.02.1980	33.5972	0	158	57.8	3	0		IU/ml	29800	4.47422	29800		IU/ml		neg.	IU/ml	0	0		4.47422						TaqMan		15 IU/ml	40.9	U/l	40.9	34	1.20294	23.5	U/l	23.5	0.574572	10	U/l	10	101.4	U/l	101.4	6.602	KU/l	6.602
uxue743uj	7	01.07.1973	40.25	1	170	73	3	0	15900000	IU/ml	15900000	7.2014	7180000	0	IU/ml	0	0	IU/ml	0	0	0	7.2014	1	0	1	0	IU/ml	TaqMan		<25	149	U/l	149	45	3.31111				0	96	U/l	96	59	U/l	59	8.665	KU/l	8.665
uyg08eatp	124	29.08.1964	49.0889	1	185	78	3	0																										45
v1l89dx99	7	29.08.1978	35.0889	1	185	87	3	0	12400000	IU/ml	12400000	7.09342	2510000	0	IU/ml	0							0					TaqMan		<25	213	U/l	213	45	4.73333				0	17	U/l	17	55	U/l	55	8.559	KU/l	8.559	4.09
v3npa3xv5	118	25.08.1976	37.1	1	182	74	3	1	2330000	IU/ml	2330000	6.36736	1250000															TaqMan		25 IU/ml	156	U/l	156	45	3.46667	247	U/l	247	1.58333	192	U/l	192	98	mg/dl	98
V40P5GKQA	33	04.04.1969	44.4917	0	160	61	3	0	247000	IU/ml	247000	5.3927																			55	U/l	55	34	1.61765	30	U/l	30	0.545455	21	U/l	21	46	U/l	46	6.77	KU/l	6.77
v4thehgq1	118	17.01.1981	32.7056	1	182	101	3	0	984000	IU/ml	984000	5.993	984000															TaqMan		25 IU/ml <391 Mio	111	U/l	111	45	2.46667	141	U/l	141	1.27027	96	U/l	96	97	U/l	97	201	mg/dl
v5ynvd89j	7	13.08.1938	75.1333	1	175	80	2	1	3090000	IU/ml	3090000	6.48996	541000	<25	IU/ml	0	0	IU/ml	0	0	0	6.48996	1	0	1	0	IU/ml	TaqMan		<25	286	U/l	286	45	6.35556				0	56	U/l	56	64	U/l	64	8.092	KU/l	8.092	3.95
V6DAF1MM7	85	25.11.1957	55.85	1	177	73	2	0	1500000	IU/ml	1500000	6.17609		560	IU/ml	660	<10	IU/ml	0	0	0	6.17609	1	0	1						41	U/l	41	45	0.911111	33	U/l	33	0.804878	37	U/l	37	59	U/l	59				59.6
v7tn6pnke	118	27.02.1984	29.5944	1	169	58	3	0	221000	IU/ml	221000	5.34439	2210000															TaqMan		25 IU/ml	231	U/l	231	45	5.13333	95	U/l	95	0.411255	91	U/l	91	92	U/l	92
v9g6x2e6p	42	25.02.1955	58.6	1	185	80	3	0	n.d.		3800000	6.57978	3800000	120	IU/ml	14	<25	IU/ml	0	0	0	6.57978	1	<25	1	<25	IU/ml	TaqMan		<25 IU/ml	76	U/l	76	45	1.68889	39	U/l	39	0.513158	18	U/l	18	61	U/l	61	6774	KU/l	6.774	4.5
va0fgtfvt	73	25.10.1955	57.9333	1	184	75	3	0	25000	IU/ml	25000	4.39794		25000	IU/ml								0											45						22	U/l	22	69	U/l	69				4.33
VAEPLLTC0	1	15.07.1969	44.2111	1	175	90	3	1	1200000	IU/ml	1200000	6.07918		neg	IU/ml																108	U/l	108	45	2.4	106	U/l	106	0.981481	104	U/l	104	97	U/l	97	7.16	KU/l	7.16	40
vaq131n9d	7	30.05.1963	50.3361	1	200	91	3	0	17100000	IU/ml	17100000	7.233	4110000	0	IU/ml	0							0					TaqMan		<25	97	U/l	97	45	2.15556				0	123	U/l	123	91	U/l	91	8.287	KU/l	8.287
VDF1GE8JD	47	24.03.1965	48.5194	0	173	73	3	1	336000	IU/ml	336000	5.52634		<25	IU/ml	14	neg	IU/ml	0	0		5.52634	1	<20	1	0	IU/ml	TaqMan		<15	45	U/l	45	34	1.32353	63	U/l	63	1.4	48	U/l	48	70	U/l	70
VE6CNJL8F	47	05.03.1975	38.5722	1	185	77	3	0	269000	IU/ml	269000	5.42975	282000	<20	IU/ml		0	IU/ml	0	0		5.42975	1	0	1			TaqMan		20	149	U/l	149	45	3.31111	62	U/l	62	0.416107	71	U/l	71	67	U/l	67	12.5	KU/l	12.5
velqc0842	7	12.09.1968	45.0528	1	174	85	2	0	1310000	IU/ml	1310000	6.11727	433000	0	IU/ml	14	0	IU/ml	0	0	0	6.11727	1	0	1	0	IU/ml	TaqMan		<25	262	U/l	262	45	5.82222				0	70	U/l	70	80	U/l	80	10.844	KU/l	10.844
vg4m1gvnt	7	27.02.1962	51.5944	1	187	110	3	0	5400000	IU/ml	5400000	6.73239	2780000	0	IU/ml	0	neg	IU/ml	0	0	0	6.73239	1	0	1	0	IU/ml	TaqMan		<25 IU/ml	163	U/l	163	45	3.62222				0	129	U/l	129	96	U/l	96				4.81
vgsvynmxq	7	04.02.1957	56.6583	0	160	67.5	2	0	15700000	IU/ml	15700000	7.1959	9430000	0	IU/ml	14	0	IU/ml	0	0	0	7.1959	1	0	1	0	IU/ml	TaqMan		<25	40	U/l	40	34	1.17647				0	23	U/l	23	77	U/l	77	9.439	KU/l	9.439
vjuuxyelw	88	03.10.1965	47.9944	1	185	87	3	0	4820	IU/ml	4820	3.68305			IU/ml																30	U/l	30	45	0.666667	23	U/l	23	0.766667	27	U/l	27	57	U/l	57
vjyhdf9ps	118	23.11.1972	40.8556	1	173	64	3	1	1790000	IU/ml	1790000	6.25285	179000															TaqMan		25 IU/ml	84	U/l	84	45	1.86667	112	U/l	112	1.33333	56	U/l	56
vkec2sv4n	98	27.01.1978	35.6778	1	167	66.5	3	0	17600	IU/ml	17600	4.24551		640	IU/ml	14															93	U/l	93	45	2.06667	55	U/l	55	0.591398	31	U/l	31	65	U/l	65	6.8	KU/l	6.8	48.6
vkxrl6crx	6	08.09.1941	72.0639	0	168	78	2	0	57000	IU/ml	57000	4.75587		0	IU/ml	0	neg.	IU/ml	0	0	0	4.75587	1	0	1	0	IU/ml	TaqMan		0	71	U/l	71	34	2.08824	58	U/l	58	0.816901	31	U/l	31				9.211	KU/l	9.211	42.5
vl0kt6aj1	1	17.04.1958	55.4556	1	187	103	2	1	905000	IU/ml	905000	5.95665		96	IU/ml		neg.	IU/ml	0	0		5.95665						TaqMan		15 IU/ml	420	U/l	420	45	9.33333	140	U/l	140	0.333333	158	U/l	158	49	U/l	49	7.39	KU/l	7.39	41
vle1nccx8	42	11.05.1974	39.3889	0	160	57	3	0	570000	IU/ml	570000	5.75587		neg.	IU/ml		neg.	IU/ml	0	0		5.75587	1	<25	1	<25	IU/ml	TaqMan		<25	63	U/l	63	34	1.85294	42	U/l	42	0.666667	13	U/l	13	57	U/l	57	6.475	KU/l	6.475	4.5
vlv1cvscx	8	26.05.1968	45.3472	1	180	74	3	1		IU/ml																					212	U/l	212	45	4.71111	109	U/l	109	0.514151	88	U/l	88	89	U/l	89				4.3
vma0ysguj	7	05.07.1967	46.2389	1	170	78	3	0	471000	IU/ml	471000	5.67302	4740000	465	IU/ml	424	0	IU/ml	0	0	0	5.67302	1	0	1	0	IU/ml	TaqMan		<25	66	U/l	66	45	1.46667				0	102	U/l	102	59	U/l	59	8.043	KU/l	8.043
vp51k9x4x	16	10.06.1975	38.3083	1	175	73	3	0	27300	IU/ml	27300	4.43616		neg.	IU/ml								0					TaqMan		< 15 IU/ml	68.2	U/l	68.2	45	1.51556	32.2	U/l	32.2	0.472141	35.6	U/l	35.6	71	U/l	71
vpufsa806	30	10.02.1987	26.6417	1	170	72		0																										45
vqc9pknh0	7	20.09.1960	53.0306	1	186	86	3	0	13600000	IU/ml	13600000	7.13354	10300000	0	IU/ml	14	0	IU/ml	0	0	0	7.13354	1	0	1	0	IU/ml	TaqMan		<25	129	U/l	129	45	2.86667				0	21	U/l	21	75	U/l	75				3.95
vr47slxmf	25	21.06.1974	39.2778	1	170	70	3	0	772730	IU/ml	772730	5.88803		4682153	IU/ml																132	U/l	132	45	2.93333	88	U/l	88	0.666667	79	U/l	79	109	U/l	109				57.4
vt4jq0t1a	47	10.08.1952	61.1417	0	164	64	3	0	1830000	IU/ml	1830000	6.26245	120000	< 20	IU/ml	0	< 20	IU/ml	0	0	0	6.26245	1	0	1	neg.	IU/ml	TaqMan		< 20 IU/ml	131	U/l	131	34	3.85294	75	U/l	75	0.572519	76	U/l	76	69	U/l	69
VTGP04WAE	55	04.01.1974	39.7417	1	165	88	3	0	55600	IU/ml	55600	4.74507				0			0	0	0	4.74507				0		TaqMan		25 IU/ml	105	U/l	105	45	2.33333	39	U/l	39	0.371429	85	U/l	85	80	U/l	80	7.1	KU/l	7.1	45.8
vtppguj3x	33	25.12.1977	35.7667	1	178	82	3	0	651000	IU/ml	651000	5.81358		neg. <10	IU/ml		neg.	IU/ml	0	0		5.81358	1	0	1			TaqMan		<10 U/l	514	U/l	514	45	11.4222	227	U/l	227	0.441634	91	U/l	91							60.8
vu6k0tm8p	1	05.04.1969	44.4889	1	169	62	2	0	4000000	IU/ml	4000000	6.60206		1680000	IU/ml		neg.	IU/ml	0	0		6.60206	1	0	1			TaqMan		15 IU/ml	44	U/l	44	45	0.977778	35	U/l	35	0.795455	43	U/l	43	86	U/l	86	8.07	KU/l	8.07	39
vv3xwj9km	47	07.07.1967	46.2333	1	173	100	3	0	1520000	IU/ml	1520000	6.18184	317000	< 25	IU/ml	33	< 20	IU/ml	0	0	0	6.18184	1	< 20	1			TaqMan		< 20 IU/ml	166	U/l	166	45	3.68889	83	U/l	83	0.5	151	U/l	151	77	U/l	77	2.9	KU/l	2.9
vv8n4favm	1	04.04.1952	61.4917	0	160	66	2	0	19000000	IU/ml	19000000	7.27875		8990	IU/ml		neg.	IU/ml	0	0		7.27875						TaqMan		< 15 IE/ml	34	U/l	34	34	1	38	U/l	38	1.11765	13	U/l	13	98	U/l	98	9.17	KU/l	9.17	37
vvnj3ph40	47	05.05.1956	57.4056	0	160	44	3	1	228000	IU/ml	228000	5.35793	330000	< 25	IU/ml	14	neg.	IU/ml	0	0	0	5.35793	1	0	1	204000	IU/ml	TaqMan		< 20 IU/ml	101	U/l	101	34	2.97059	54	U/l	54	0.534653	43	U/l	43	53	U/l	53
vxms06aml	1	22.06.1973	40.275	1	175	66	3	0	794000	IU/ml	794000	5.89982		144	IU/ml		neg.	IU/ml	0	0		5.89982	1	0	1			TaqMan		< 15 IU/ml	329	U/l	329	45	7.31111	163	U/l	163	0.495441	146	U/l	146	71	U/l	71	8.84	KU/l	8.84	47
VXUTQXQYF	1	02.06.1964	49.3306	1	176	110	2	0	23000	IU/ml	23000	4.36173		<15	IU/ml		<15	IU/ml	15	1.17609		5.53782	1	0	1	neg	IU/ml	TaqMan		<15 IU/ml	91	U/l	91	45	2.02222	54	U/l	54	0.593407	30	U/l	30	86	U/l	86	9.3	KU/l	9.3	43
W08MCHY8T	13	08.04.1955	58.4806	1	180	80	3	0	4920	IU/ml	4920	3.69197	21200	neg	IU/ml	0	neg	IU/ml	0	0	0	3.69197	1	0	1	neg.	IU/ml	TaqMan		15 IU/ml	195	U/l	195	45	4.33333	53	U/l	53	0.271795	35	U/l	35	52	U/l	52
w4wd0duuk	47	28.07.1975	38.175	0	152	60	3	0	5980000	IU/ml	5980000	6.7767		< 20	IU/ml	0	neg.	IU/ml	0	0	0	6.7767	1	0	1			TaqMan		< 20 IU/ml	105	U/l	105	34	3.08824	86	U/l	86	0.819048	21	U/l	21	15	U/l	15	6.5	KU/l	6.5	55.9
w5u6c82kr	1	26.07.1986	27.1806	1	180	84	2	0	2340000	IU/ml	2340000	6.36922		neg.	IU/ml		neg.	IU/ml	0	0		6.36922	1	0	1	neg.	IU/ml	TaqMan		< 15 IU/ml	70	U/l	70	45	1.55556	53	U/l	53	0.757143	16	U/l	16	51	U/l	51	9.22	KU/l	9.22	47
w6d68e0yr	47	12.06.1942	71.3028	1	174	78	2	0	2570000	IU/ml	2570000	6.40993	2710000	< 20	IU/ml	0	< 20	IU/ml	0	0	0	6.40993	1	0	1	< 5	IU/ml	TaqMan		20 IU/ml	16	U/l	16	45	0.355556	15	U/l	15	0.9375	22	U/l	22	48	U/l	48	7.1	KU/l	7.1	58.2
w7nwggw16	47	03.05.1985	28.4111	1	168	66	3	0	1050000	IU/ml	1050000	6.02119	14000	< 20	IU/ml		< 20	IU/ml	0	0	0	6.02119	1					TaqMan		< 20 IU/ml	269	U/l	269	45	5.97778	80	U/l	80	0.297398	73	U/l	73	82	U/l	82	9.5	KU/l	9.5	58.7
W7S4X695C	13	22.06.1954	59.275	0	167	95	3	0			1150000	6.0607				0																	39	34	1.14706			32	0.820513			33			75
wc289e40v	47	09.01.1954	59.7278	1	178	82	3	0	5830000	IU/ml	5830000	6.76567		< 20	IU/ml	14	< 20	IU/ml	0	0	0	6.76567	1	< 20	1	< 20	IU/ml	TaqMan		20 IU/ml	120	U/l	120	45	2.66667	86	U/l	86	0.716667	151	U/l	151	74	U/l	74
WD7Y274NN	8	10.03.1965	48.5583	0	159	59	3	0	238000	IU/ml	238000	5.37658	430000						0	0	0	5.37658						TaqMan		15 IE/ml	54	U/l	54	34	1.58824	37	U/l	37	0.685185	30	U/l	30	60	U/l	60				4.4
WFKFD39SX	22	06.05.1947	66.4028	0	160	73	2	0	6660000	IU/ml	6660000	6.82347				34	neg.	IU/ml	0	0		6.82347	1	0	1			TaqMan		0,01 KIU/ml	22	U/l	22	34	0.647059	26	U/l	26	1.18182	14	U/l	14	69	U/l	69	8.4	KU/l	8.4
wg593hag9	17	08.03.1984	29.5639	1	176	71	3	0	64000	IU/ml	64000	4.80618	64000	< 12	IU/ml	12	< 12	IU/ml	12	1.07918	12	5.88536	1	<12	1			Sonstiges	PCR	< 12 - 50 IU/ml	163	U/l	163	45	3.62222	67	U/l	67	0.411043	70	U/l	70	113	U/l	113	9.93	KU/l	9.93	5.2
WH7XVYNHP	47	22.06.1961	52.275	1	172	70	3	0	3500000	IU/ml	3500000	6.54407	5020000				0	IU/ml	0	0		6.54407	0					TaqMan			115	U/l	115	45	2.55556	72	U/l	72	0.626087	31	U/l	31	109	U/l	109	6.7	KU/l	6.7	47
wh9nl012j	17	06.10.1969	43.9861	1	193	100	3	0	193300	IU/ml	193300	5.28623		96100	IU/ml		neg.	IU/ml	0	0		5.28623	1			< NWG	IU/ml	Abbott Real Time PCR	Abbott Real Time PCR	< 12 - 50	11	U/l	11	45	0.244444	17	U/l	17	1.54545	12	U/l	12	82	U/l	82	7.869	KU/l	7.869	7.9
wjpwngc5r	17	08.05.1979	34.3972	1	175	118	3	0	204800	IU/ml	204800	5.31133		20	IU/ml		neg.	IU/ml	0	0		5.31133	1	0	1	neg.	IU/ml	Abbott Real Time PCR	Abbott Realtime PCR	< 12 - 50	100	U/l	100	45	2.22222	48	U/l	48	0.48	124	U/l	124	102	U/l	102	1.2622	KU/l	1.2622	7.2
WJVHW5L5V	13	23.06.1964	49.2722	1	176	80	2	0	2480000	IU/ml	2480000	6.39445	1100000	<25	IU/ml	450	neg	IU/ml	0	0	0	6.39445									322	U/l	322	45	7.15556	127	U/l	127	0.39441	38	U/l	38	68	U/l	68
WLG3TS7DJ	44							0			530000	5.72428	530000
wltuajygp	5	16.08.1968	45.125	0	162	72.3	3	0	2545000	IU/ml	2545000	6.40569	267000	< 15	IU/ml	0	< 15	IU/ml	0	0	0	6.40569	1	< 15	1	< 15	IU/ml	TaqMan		15 IU/ml	59	U/l	59	34	1.73529	40	U/l	40	0.677966	22	U/l	22
wm0sncnh9	130	21.12.1979	33.7778	1	172	60	3	0	25322	IU/ml	25322	4.4035	132000	neg.	IU/ml	0	neg.	IU/ml	0	0	0	4.4035	1	0	1	neg.	IU/ml	TaqMan		< 43	204	U/l	204	45	4.53333	65	U/l	65	0.318627	33	U/l	33	72	U/l	72
wn51umrqx	44	05.08.1969	44.1556	1	181	85	2	0	6521779	IU/ml	6521779	6.81437	5460000										0					TaqMan		< 25 IU/ml	92.1	U/l	92.1	45	2.04667	62.8	U/l	62.8	0.681868	17	U/l	17	59.6	U/l	59.6				38.4
wpqha86rk	5	07.06.1983	30.3167	1	182	85	3	0	398600	IU/ml	398600	5.60054	24600	< 15	IU/ml	0	< 15	IU/ml	0	0	0	5.60054	1	< 15	1	< 15	IU/ml	TaqMan		< 15 IU/ml	114	U/l	114	45	2.53333	69	U/l	69	0.605263	99	U/l	99	78	U/l	78				43.3
wqvdvja6y	5	19.03.1967	46.5333	1	178	84	2	0	1137000	IU/ml	1137000	6.05576	895000		IU/ml	830000															77	U/l	77	45	1.71111	56	U/l	56	0.727273	68	U/l	68	94	U/l	94				42.8
wr3qr7mru	130	06.10.1978	34.9861	0	163	52	3	0	16771	IU/ml	16771	4.22456		neg.	IU/ml	0	nd		0	0	0	4.22456	1					TaqMan		< 43	99	U/l	99	34	2.91176	45	U/l	45	0.454545	22	U/l	22	31	U/l	31	7.957	KU/l	7.957	64.3
WS3UNUX1J	17	30.01.1976	37.6694	1	176	70	3	0	150000	IU/ml	150000	5.17609		66	IU/ml			IU/ml					0					Sonstiges	PCR	12	426	U/l	426	45	9.46667	406	U/l	406	0.953052	611	U/l	611	80	U/l	80	9.251	KU/l	9.251	46.2
wsfa5tu00	5	04.01.1966	47.7417	1	168	66	3	0	1407000	IU/ml	1407000	6.14829	1240000	< 15	IU/ml	0	< 15	IU/ml	0	0	0	6.14829	1	< 15	1	< 15	IU/ml	TaqMan		< 15 IU/ml	59	U/l	59	45	1.31111	49	U/l	49	0.830508	32	U/l	32	64	U/l	64
wsqtmlhjm	130	29.05.1970	43.3389	0	164	94	3	0	57249	IU/ml	57249	4.75777	366000	6262	IU/ml	675	neg.	IU/ml	0	0	0	4.75777	1	0	1	neg.	IU/ml	TaqMan		< 43	22	U/l	22	34	0.647059	34	U/l	34	1.54545	20	U/l	20	67	U/l	67
wvpru70lm	118	07.12.1975	37.8167	1	177	70	3	0	1550000	IU/ml	1550000	6.19033																TaqMan		25 IU/ml	65	U/l	65	45	1.44444	76	U/l	76	1.16923	52	U/l	52
wwja34au3	143	27.12.1964	48.7611	1	182	66	3	0										IU/ml													90	U/l	90	45	2	100	U/l	100	1.11111	116	U/l	116	60	U/l	60
WXNLTGYK9	47	25.03.1961	52.5167	1	178	100	3	1	79000	IU/ml	79000	4.89763	645000	<25	IU/ml								0					TaqMan			93	U/l	93	45	2.06667	176	U/l	176	1.89247	129	U/l	129	250	U/l	250
x09v3sg73	25	10.10.1974	38.975	0	175	99	3	0	73809	IU/ml	73809	4.86811		0	IU/ml		0	IU/ml	0	0		4.86811									30	U/l	30	34	0.882353	30	U/l	30	1	75	U/l	75	67	U/l	67	11.4	KU/l	11.4
x3jn0j3q0	120	23.02.1971	42.6056	1	176	70	3	0															1	0	1	neg	IU/ml	Abbott Real Time PCR	abbot real time	12 IU/ml	2.69	µkat/l	161.368	45	3.58595	6.4	µkat/l	383.923	2.37918	2.22	µkat/l	133.173	1.4	µkat/l	83.9832				46.1
X6PS4HFQ6	66							0			380000	5.57978	380000			14			0	0	0	5.57978
X7DF1G769	47	10.09.1966	47.0583	1	173	81	3	0	551000	IU/ml	551000	5.74115	134000	45	IU/ml	38	neg	IU/ml	0	0		5.74115	1	0	1			TaqMan		<15	50	U/l	50	45	1.11111	39	U/l	39	0.78	83	U/l	83	74	U/l	74
x9fhelsxc	1	19.03.1981	32.5333	0	170	148	3	0	1180000	IU/ml	1180000	6.07188		<15	IU/ml		neg.	IU/ml	0	0		6.07188	1	0	1			TaqMan		< 15 IE/ml	267	U/l	267	34	7.85294	162	U/l	162	0.606742	137	U/l	137	69	U/l	69	7.21	KU/l	7.21	39
X9TUA4J1N	1	06.07.1977	36.2361	1	184	74	3	0	6700000	IU/ml	6700000	6.82607		neg	IU/ml																174	U/l	174	45	3.86667	64	U/l	64	0.367816	34	U/l	34	89	U/l	89	8.52	KU/l	8.52	45
xaeexcegd	148	02.07.1957	56.2472	0	168	114	3	1	140000	IU/ml	140000	5.14613	648000	80	IU/ml	152	<10	IU/ml	0	0	0	5.14613	0					TaqMan		10 IU/ml	58	U/l	58	34	1.70588	48	U/l	48	0.827586	131	U/l	131	75	U/l	75	10.3	KU/l	10.3	43.6
xc66w22fr	142	07.08.1971	42.15	1	180	100	3	0	146276	IU/ml	146276	5.16517	14800	< 12	IU/ml	0	< 12	IU/ml	0	0	0	5.16517	1	< 12	1	< 12	IU/ml	Abbott Real Time PCR	Abott Realtime PCR	< 12 IU/ml	59	U/l	59	45	1.31111	43	U/l	43	0.728814	27	U/l	27	110	U/l	110				60.1
xd3et4qfv	1	09.12.1983	29.8111	0	172	62	2	0	916000	IU/ml	916000	5.9619		< 15	IU/ml		neg.	IU/ml	0	0		5.9619	1	0	1	neg.	IU/ml	TaqMan		< 15 IU/ml	36	U/l	36	34	1.05882	33	U/l	33	0.916667	13	U/l	13	40	U/l	40	6.14	KU/l	6.14	46
xfj2ydrgl	142	28.04.1958	55.425	0	164	65	3	0	401312	IU/ml	401312	5.60348	309000	< 12	IU/ml	0	< 12	IU/ml	0	0	0	5.60348	1	< 12	1	< 12	IU/ml	Abbott Real Time PCR	Abbott m2000 rt	< 12 IU/ml	185	U/l	185	34	5.44118	157	U/l	157	0.848649	57	U/l	57	90						59.2
xggxmcm80	10	04.01.1957	56.7417	1	178	80	2	0	9000000	IU/ml	9000000	6.95424		15	IU/ml		15	IU/ml	15	1.17609		8.13033									236	U/l	236	45	5.24444	127	U/l	127	0.538136	175	U/l	175	50	U/l	50	8.41	U/l	8.41	44
XH4V1393X	142	27.07.1973	40.1778	1	178	97.6	3	1	1466491	IU/ml	1466491	6.16628	1300000			0			12	1.07918		7.24546		12	0	12		Abbott Real Time PCR	Abott	15	214	U/l	214	45	4.75556	86	U/l	86	0.401869	91	U/l	91	61	U/l	61				55.7
xk4tn1hkj	142	14.01.1964	49.7139	1	170	88	3	1	374178	IU/ml	374178	5.57308	189000	7377	IU/ml	9460	<12	IU/ml	0	0	0	5.57308	1	<12	1	<12	IU/ml	Abbott Real Time PCR	Abbott	<12 IU/ml	149	U/l	149	45	3.31111	124	U/l	124	0.832215	88	U/l	88	145	U/l	145				52.9
XL7HQFQYM	42	12.04.1968	45.4694	1	173	79.9	3	0	140000	IU/ml	140000	5.14613	1300000	<25	IU/ml	0	<15	IU/ml	15	1.17609	15	6.32222	1	<25	1	<25	IU/ml	TaqMan		<25 IU/ml	140	U/l	140	45	3.11111	63	U/l	63	0.45	76	U/l	76	70	U/l	70	8061	U/l	8.061	4.5
xq75x49a4	16	21.08.1957	56.1111	0	160	65	2	0	127000	IU/ml	127000	5.1038	87300	neg	IU/ml	0	nd	IU/ml	0	0	0	5.1038	1					TaqMan		<15	54.7	U/l	54.7	34	1.60882	44	U/l	44	0.804388	68.4	U/l	68.4	89	U/l	89	6.093	KU/l	6.093
xrmyst3a1	142	21.01.1979	34.6944	1	176	65	3	0	3562613	IU/ml	3562613	6.55177	3180000	< 12	IU/ml	0	< 12	IU/ml	0	0	0	6.55177	1	< 12	1	< 12	IU/ml	Abbott Real Time PCR	Abott Realtime PCR	< 12 IU/ml	110	U/l	110	45	2.44444	57	U/l	57	0.518182	61	U/l	61	63	U/l	63				70.1
XSJFFCYSJ	13							0
xt4g1mej5	142	24.06.1974	39.2694	0	175	88	3	0	1258443	IU/ml	1258443	6.09983	1300000	1367	IU/ml	0	< 12	IU/ml	12	1.07918		7.17901	1	< 12	1	< 12	IU/ml	Abbott Real Time PCR	Abott Realtime PCR m2000	< 12 IU/ml	50	U/l	50	34	1.47059	39	U/l	39	0.78	45	U/l	45	52	U/l	52				3.9
xtwk519ve	152	01.01.1966	47.75	1			3	0	120000	IU/ml	120000	5.07918	94200	< 15	IU/ml		< 15	IU/ml	0	0	0	5.07918	1					TaqMan		< 15 IU/ml	84	U/l	84	45	1.86667	55	U/l	55	0.654762	151	U/l	151	112	U/l	112	12.11	KU/l	12.11	36
xvhlald5v	152	18.04.1972	41.4528	1		114	3	0	nd	IU/ml	907000	5.95761	907000	100	IU/ml	98	< 15	IU/ml	0	0	0	5.95761						TaqMan		< 15 IU/ml	239	U/l	239	45	5.31111	205	U/l	205	0.857741	339	U/l	339	117	U/l	117	13.18	KU/l	13.18	38
xwa9xc1dp	152	21.04.1967	46.4444	0	155	70	3	0	3200000	IU/ml	3200000	6.50515	4580000	< 15	IU/ml	14	nd		15	1.17609	15	7.68124	0					TaqMan		< 15	108	U/l	108	34	3.17647	81	U/l	81	0.75	103	U/l	103	158	U/l	158	9.52	KU/l	9.52	36
XX8Q54C6Q	38	31.08.1981	32.0861	0	174	72.7	3	0	7435930	IU/ml	7435930	6.87134				0		IU/ml	0	0	0	6.87134		0	1	0		Sonstiges	PCR	15	231	U/l	231	34	6.79412	142	U/l	142	0.614719	250	U/l	250	65	U/l	65	5.96	KU/l	5.96	44.8
XY8NSSU8P	13							0
Y11FE64UM	38	06.11.1961	51.9028	1	182	81.4	3	0	23055	IU/ml	23055	4.36277		neg	IU/ml	0	neg	IU/ml	0	0	0	4.36277	1	0	1	neg	IU/ml	Sonstiges	PCR	10.5	88	U/l	88	45	1.95556	65	U/l	65	0.738636	48	U/l	48	68	U/l	68	7.47	KU/l	7.47
Y16QJ5DF9	17	07.05.1975	38.4	1	175	83	2	0	1890000	IU/ml	1890000	6.27646		neg	IU/ml																52	U/l	52	45	1.15556	32	U/l	32	0.615385	29	U/l	29	58	U/l	58
y2ul65lng	38	01.09.1988	25.0833	1	179	71	3	0	7437005	IU/ml	7437005	6.8714		< 12	IU/ml		neg	IU/ml	0	0		6.8714	1	0	1	neg	IU/ml	Sonstiges	PCR	10,5 IU/ml	254	U/l	254	45	5.64444	102	U/l	102	0.401575	115	U/l	115	63	U/l	63	7.35	KU/l	7.35
y3e80str6	88			1	179	76	3	0	360000	IU/ml	360000	5.5563			IU/ml	14		IU/ml	0	0	0	5.5563	1	0	1			TaqMan		15 IU/ml	142	U/l	142	45	3.15556	122	U/l	122	0.859155	101	U/l	101
Y3PKK9NXS	44	21.05.1975	38.3611	1	190	96	3	0	780	IU/ml	780	2.89209	9200			0															110	U/l	110	45	2.44444	81	U/l	81	0.736364	67	U/l	67	62	U/l	62				53
Y5M32CF8C	47	23.07.1987	26.1889	0	181	70	3	0	202000	IU/ml	202000	5.30535	94100	<15	IU/ml		<20	IU/ml	0	0	0	5.30535	1	0	1			TaqMan			63	U/l	63	34	1.85294	63	U/l	63	1	21	U/l	21	108	U/l	108	9	KU/l	9	60.6
Y6H0W7F8L	85	11.02.1983	30.6389	0	173	99.8	3	0	10000	IU/ml	10000	4		<10	IU/ml	0	<10	IU/ml	0	0	0	4	1	<10	1	neg.	IU/ml	TaqMan		10 IU/ml	58	U/l	58	34	1.70588	36	U/l	36	0.62069	94	U/l	94	65	U/l	65				59.8
y7aryek8g	55	22.11.1972	40.8583	1	181	92	3	0	5910000	IU/ml	5910000	6.77159		neg.	IU/ml		neg.	IU/ml	0	0		6.77159	1	0	1	neg.	IU/ml				177	U/l	177	45	3.93333	89	U/l	89	0.502825	66	U/l	66	67	U/l	67	11.6	KU/l	11.6	57
y8fkaax7v	55	17.10.1978	34.9556	1	174	82	3	0	3260000	IU/ml	3260000	6.51322		<25	IU/ml	14	neg	IU/ml	0	0		6.51322	1	0	1	neg	IU/ml				71	U/l	71	45	1.57778	66	U/l	66	0.929577	107	U/l	107	82	U/l	82	13	KU/l	13	51.7
y9dt8cn9v	7	12.07.1949	64.2194	1	174	78.5	3	0	7310000	IU/ml	7310000	6.86392		492	IU/ml	872	0		0	0	0	6.86392	1	6840000	0			TaqMan		<25 IU/ml	66	U/l	66	45	1.46667				0	59	U/l	59	78	U/l	78	8.268	KU/l	8.268	5.13
yac6s429e	55	05.06.1981	32.3222	1	177	73	3	0	4710000	IU/ml	4710000	6.67302		< NWG	IU/ml		neg.	IU/ml	0	0		6.67302	1	0	1	n.nachw.	IU/ml				73			45		38				41			75			7.7			55.7
yapf2ky2m	55	16.10.1973	39.9583	1	173	74	2	0	4750000	IU/ml	4750000	6.67669		< NWG	IU/ml		neg.	IU/ml	0	0		6.67669	1	0	1						37			45		39				15			59			8.6			63.4
yc6jry679	67	28.02.1980	33.5917	1	178	80	3	0	94550	IU/ml	94550	4.97566	61300	< 15	IU/ml	0			0	0	0	4.97566	1	< 15	1			TaqMan		< 15 IU/ml	54	U/l	54	45	1.2	31	U/l	31	0.574074	39	U/l	39	60	U/l	60	7.4	KU/l	7.4	66.9
yl2mehg7s	93	27.01.1967	46.6778	1	182	61	3	0	1260000	IU/ml	1260000	6.10037	23500	14	IU/ml	0	neg.	IU/ml	0	0	0	6.10037									52.8	U/l	52.8	45	1.17333	45	U/l	45	0.852273	30.6	U/l	30.6	78	U/l	78	11.2	KU/l	11.2	42.3
yl9v064pm	152	25.02.1965	48.6	0	167	63.5	3	0	9400000	IU/ml	9400000	6.97313		< 15	IU/ml								0					TaqMan		< 15	117	U/l	117	34	3.44118	65	U/l	65	0.555556	29	U/l	29	60	U/l	60	8.61	KU/l	8.61	44
yn33t9hyq	77	19.07.1977	36.2	1	176		3	1	12000	IU/ml	12000	4.07918	6140		IU/ml																50	U/l	50	45	1.11111	83	U/l	83	1.66	41	U/l	41	88	U/l	88
ynpmacqt5	25	08.05.1990	23.3972	0	168	61.5	3	0	25506	IU/ml	25506	4.40664																			150	U/l	150	34	4.41176	99	U/l	99	0.66	31	U/l	31	96	U/l	96	10.8	KU/l	10.8	57.4
ysg1m1wxk	55	31.03.1938	75.5028	1	176	70	2	0	1600000	IU/ml	1600000	6.20412											1					Sonstiges		nd	241			45		160				78			84			8.7			47.7
yslapgd0w	55	22.12.1964	48.775	0	156	55	3	0	590000	IU/ml	590000	5.77085											1	0	1	neg	IU/ml				105	U/l	105	34	3.08824	89	U/l	89	0.847619	71	U/l	71	96	U/l	96	5.7	KU/l	5.7	49.7
yt3ugukt5	7	09.11.1954	58.8944	0	160	55	3	0	657000	IU/ml	657000	5.81757	676000	2000	IU/ml	1060							0			811000	IU/ml	TaqMan		<25	22	U/l	22	34	0.647059				0	27	U/l	27	64	U/l	64	10.723	KU/l	10.723
yujkqtes1	152	01.01.1941	72.75	1	172	73	2	0	620000	IU/ml	620000	5.79239		< 15	IU/ml	0	< 15	IU/ml	0	0	0	5.79239	1	< 15	1	< 15	IU/ml	TaqMan		< 15 IU/ml	171	U/l	171	45	3.8	78	U/l	78	0.45614	36	U/l	36	80	U/l	80	9.88	KU/l	9.88	36
yvg7vq2mg	1	31.05.1961	52.3361	0	161	63	2	0	54800	IU/ml	54800	4.73878		< 15	IU/ml		neg	IU/ml	0	0	0	4.73878	1	0	1	neg	IU/ml	TaqMan		<15	57	U/l	57	34	1.67647	51	U/l	51	0.894737	37	U/l	37	45	U/l	45	8.59	KU/l	8.59	39
ywk6224yc	152	01.08.1972	41.1667	1	172	80	3	0	180000	IU/ml	180000	5.25527		nd	IU/ml	14	nd	IU/ml	0	0	0	5.25527						TaqMan		< 15 IU/ml	324	U/l	324	45	7.2	88	U/l	88	0.271605	65	U/l	65	85	U/l	85	14.73	KU/l	14.73	40
yxyp4r8pe	152	22.03.1962	51.525	0	160	46		0	500000	IU/ml	500000	5.69897		< 15	IU/ml	14															37	U/l	37	34	1.08824	27	U/l	27	0.72973	40	U/l	40	114	U/l	114	13.07	KU/l	13.07	39
yyxgpe73v	152	15.09.1960	53.0444	1	177	74	3	0	1500000	IU/ml	1500000	6.17609	1600000	nd	IU/ml	51	< 15	IU/ml	0	0	0	6.17609				neg	IU/ml	TaqMan		< 15 IU/ml	440	U/l	440	45	9.77778	292	U/l	292	0.663636	105	U/l	105	182	U/l	182	8.58	KU/l	8.58	38
0yhm596s9	38	24957	45.4222	1	182	149	2	0			8600000	6.9345		0					0	0		6.9345		0	1	0		Sonstiges	PCR	10.5			100	45	2.22222			62	0.62			68			68			10.29
h8sln5vwx	47	27582	38.2333	0	160	60	3	0			13500	4.13033														nd		TaqMan		20			33	34	0.970588			28	0.848485			13			53
[truncated: 31 more columns]
